# Supplementary material for: C2-symmetric proline-derived tetraamine as highly effective catalyst for direct asymmetric Michael addition of ketones to chalcones
Source: Royal Society of Chemistry journal article supplement (doi:10.1039/c2ob06897d), 2012-01-01
Supplement: c2ob06897d.pdf [file c2ob06897d.pdf]

### $^1\text{H}$ NMR and $^{13}\text{C}$ NMR of catalysts

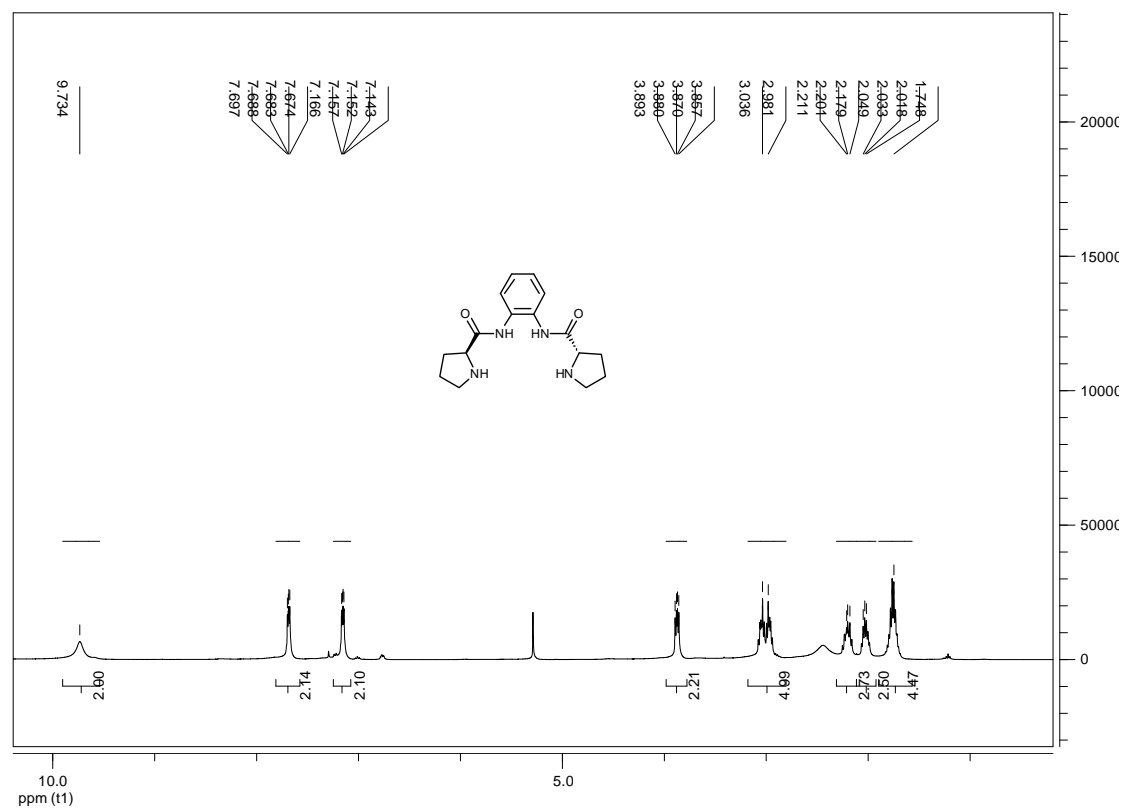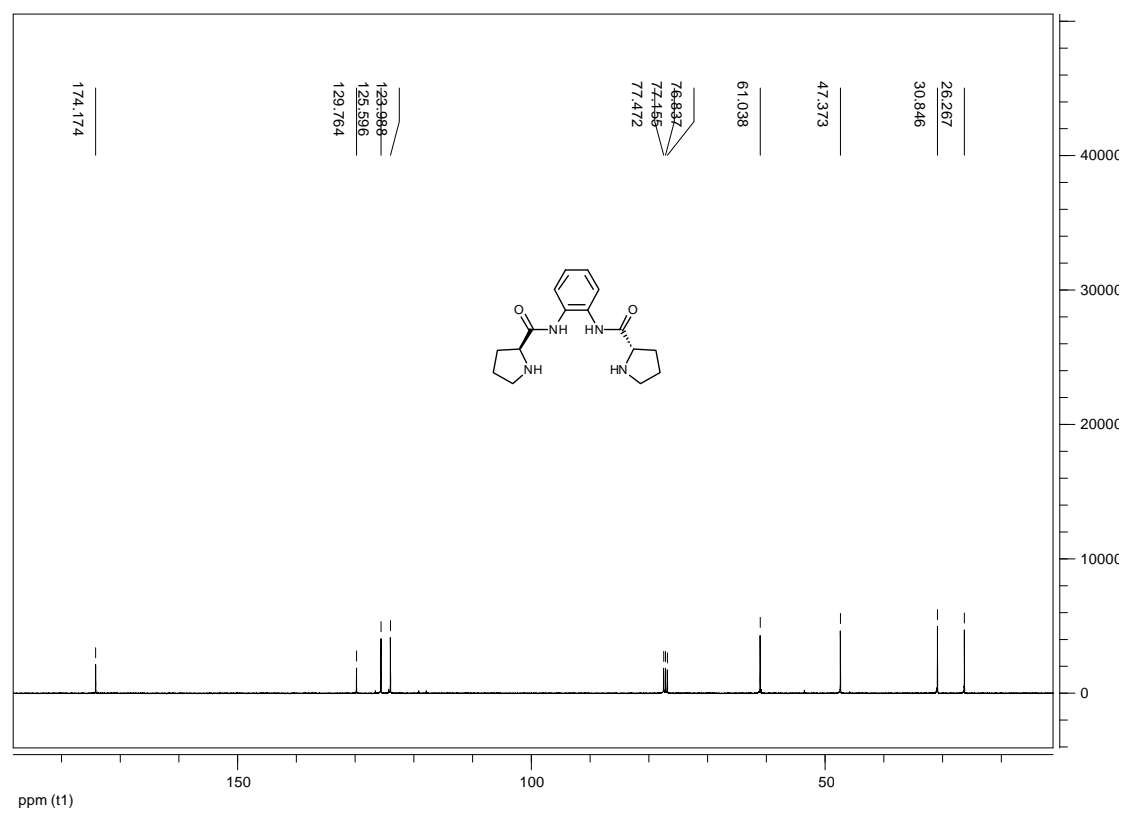

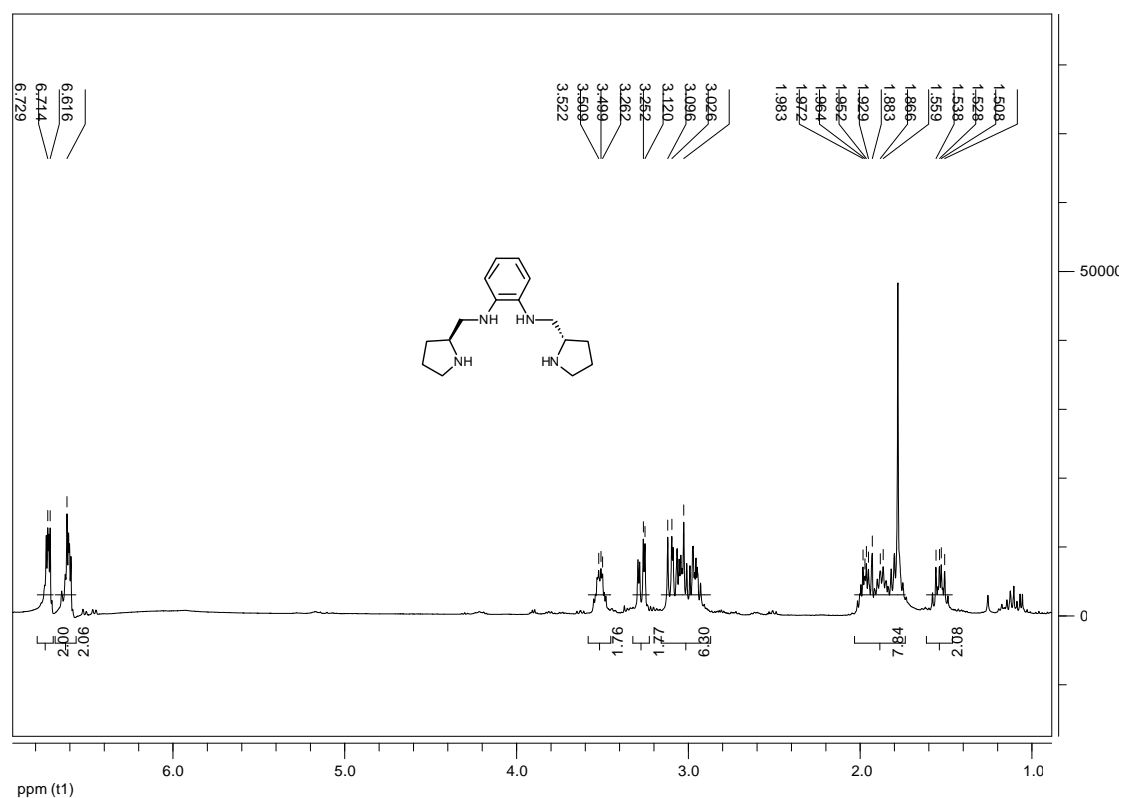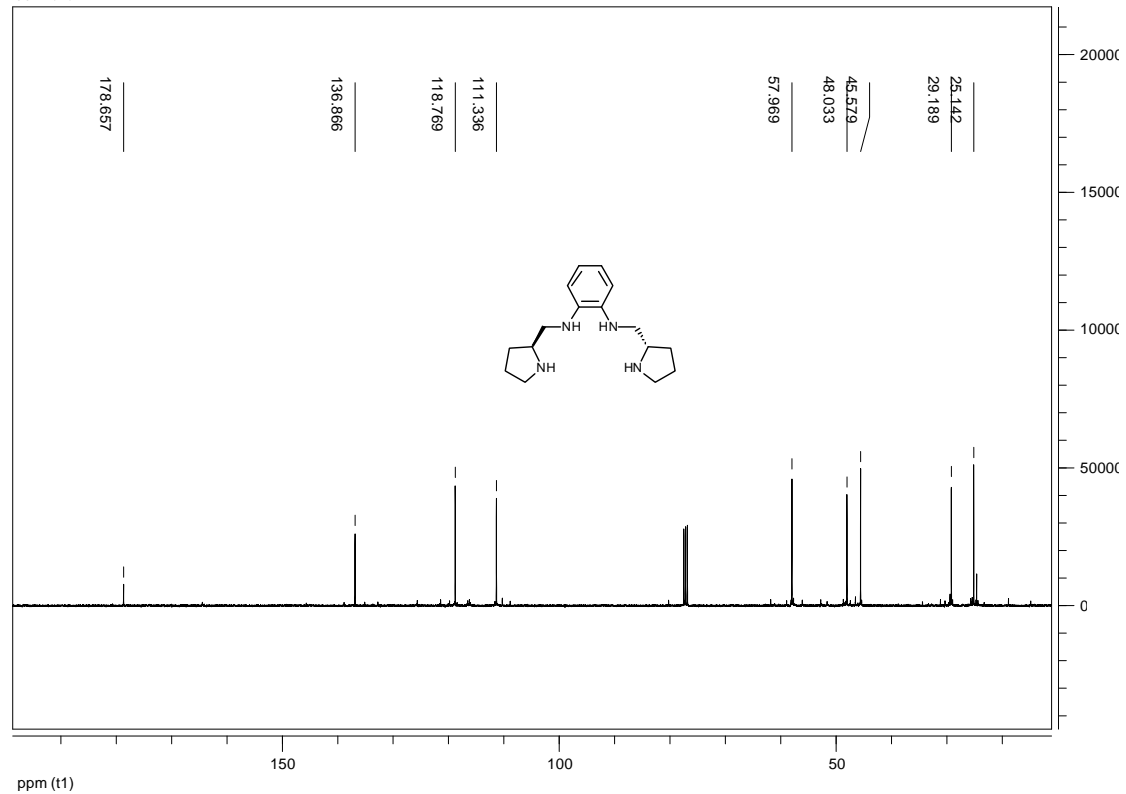

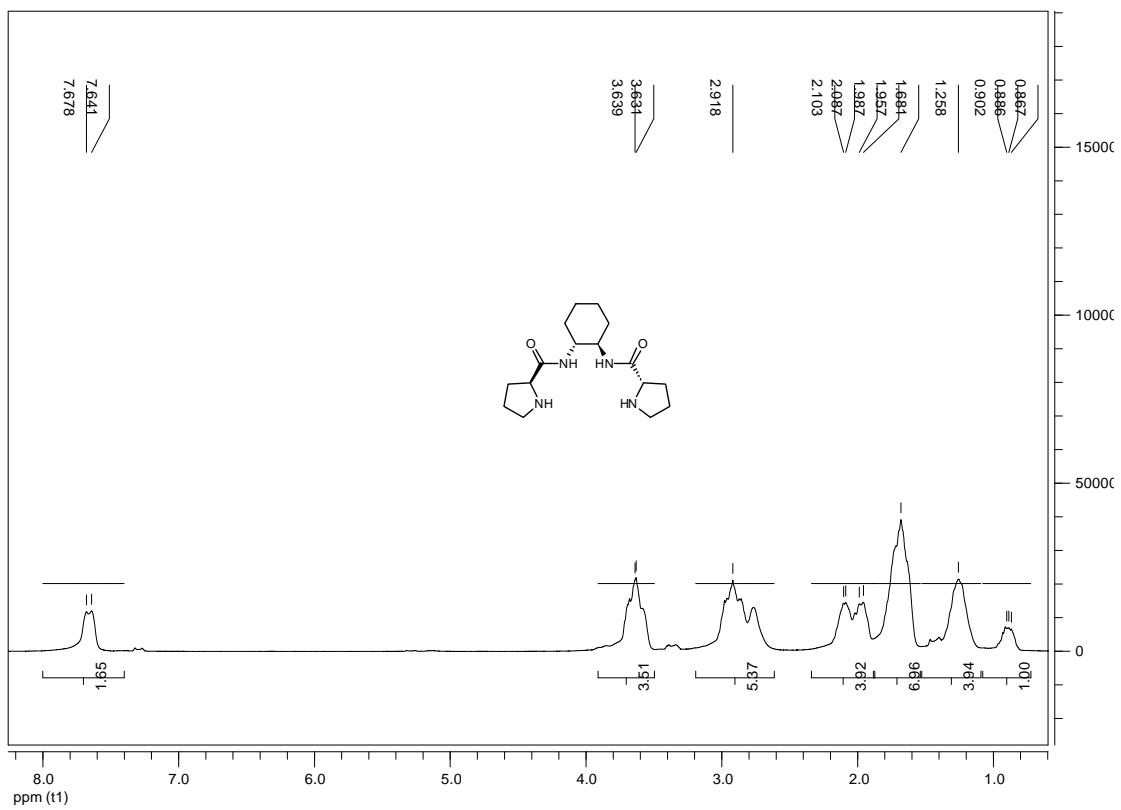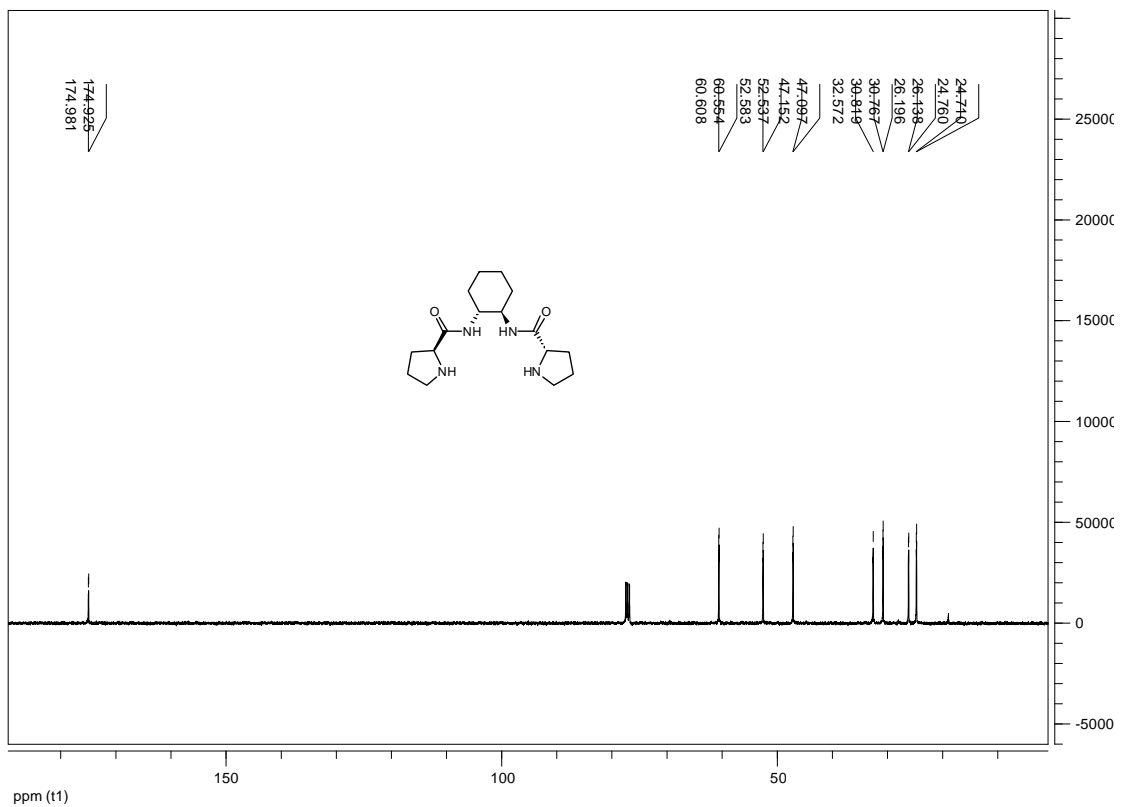

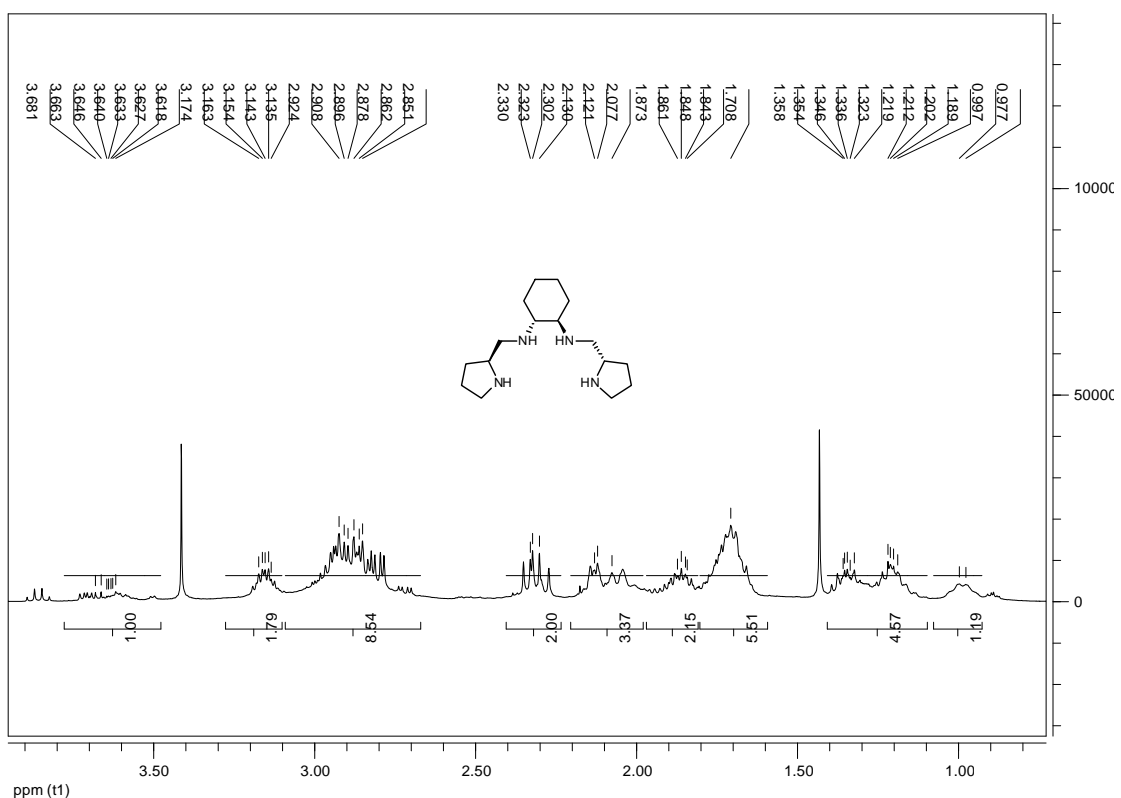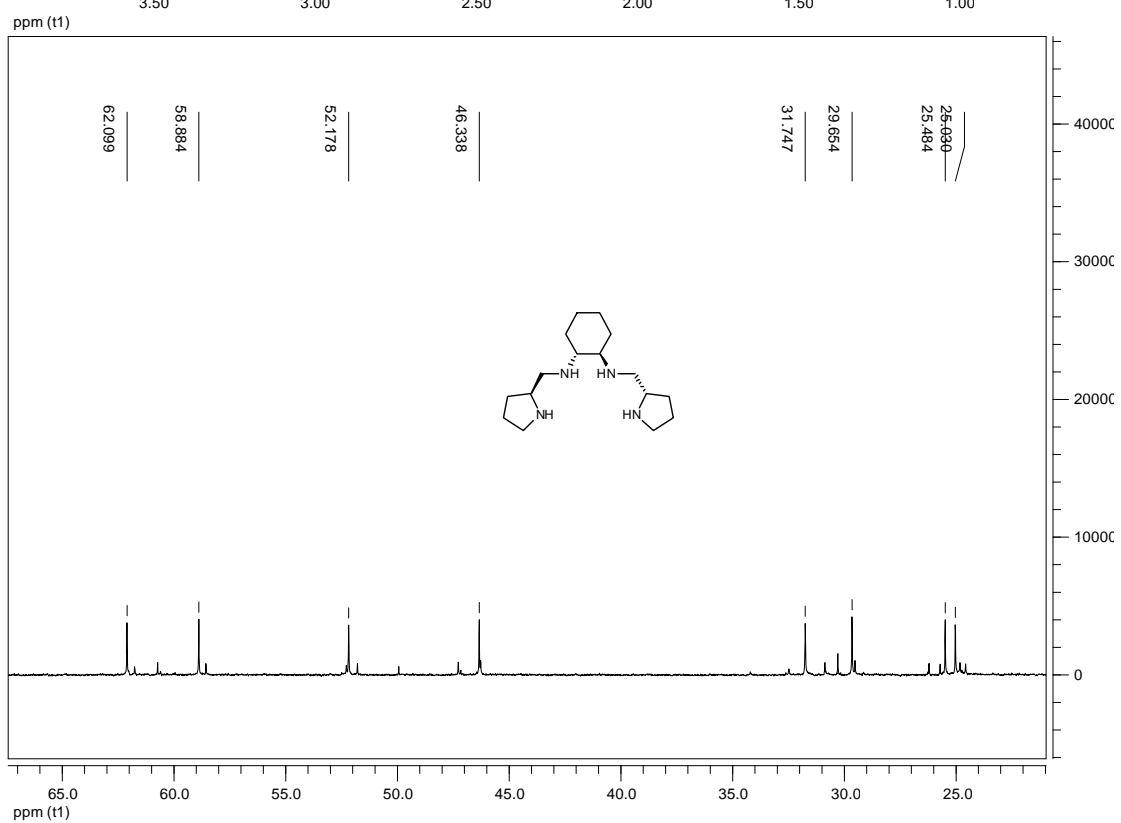

### $^1\text{H}$ NMR and $^{13}\text{C}$ NMR of Michael products

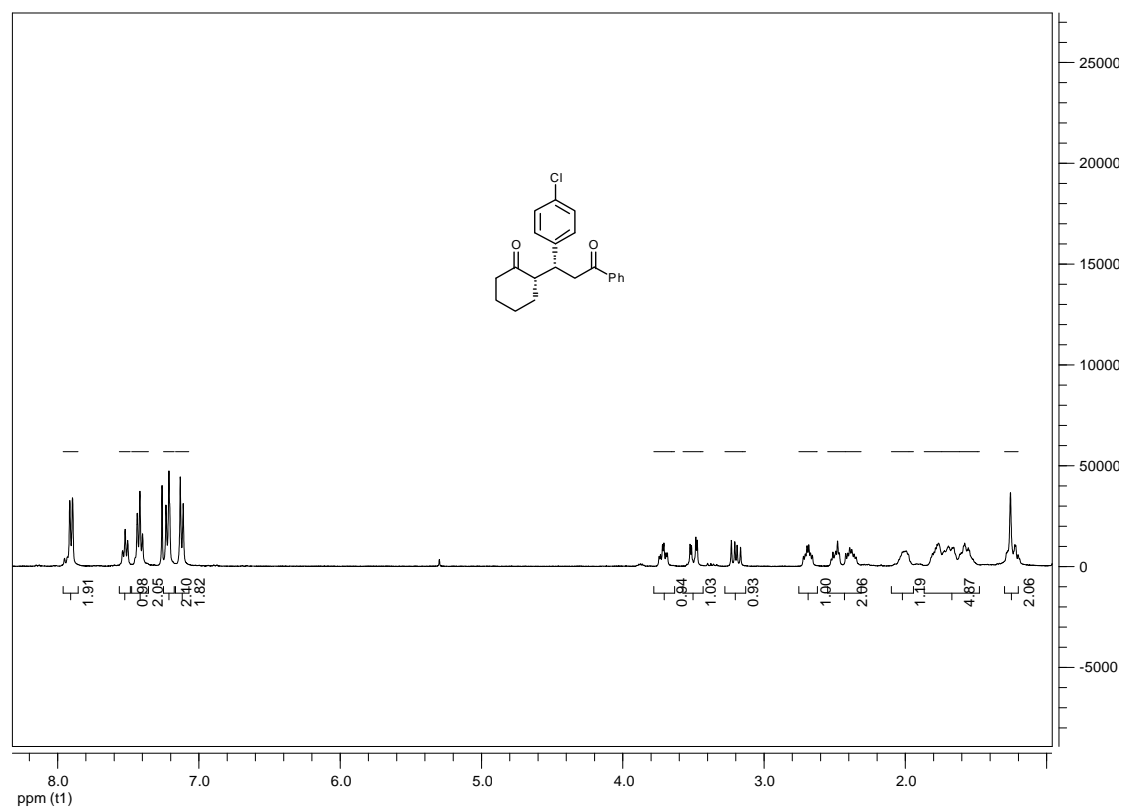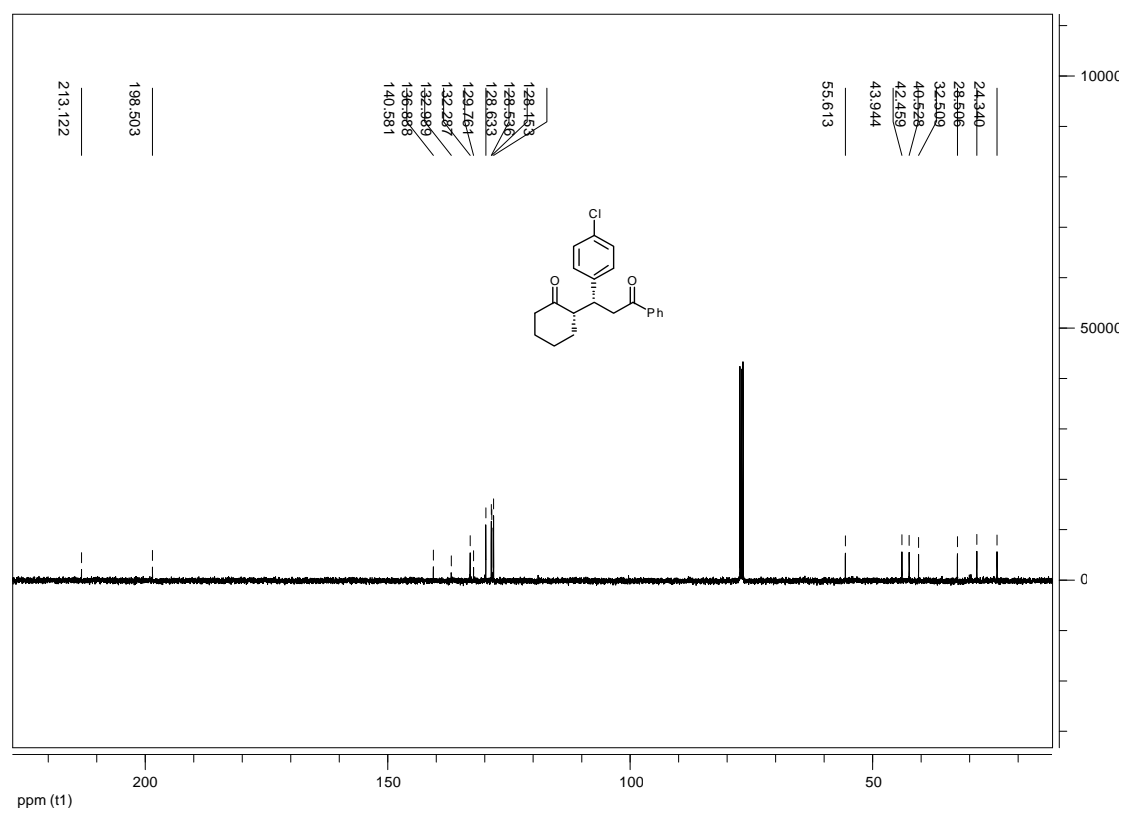

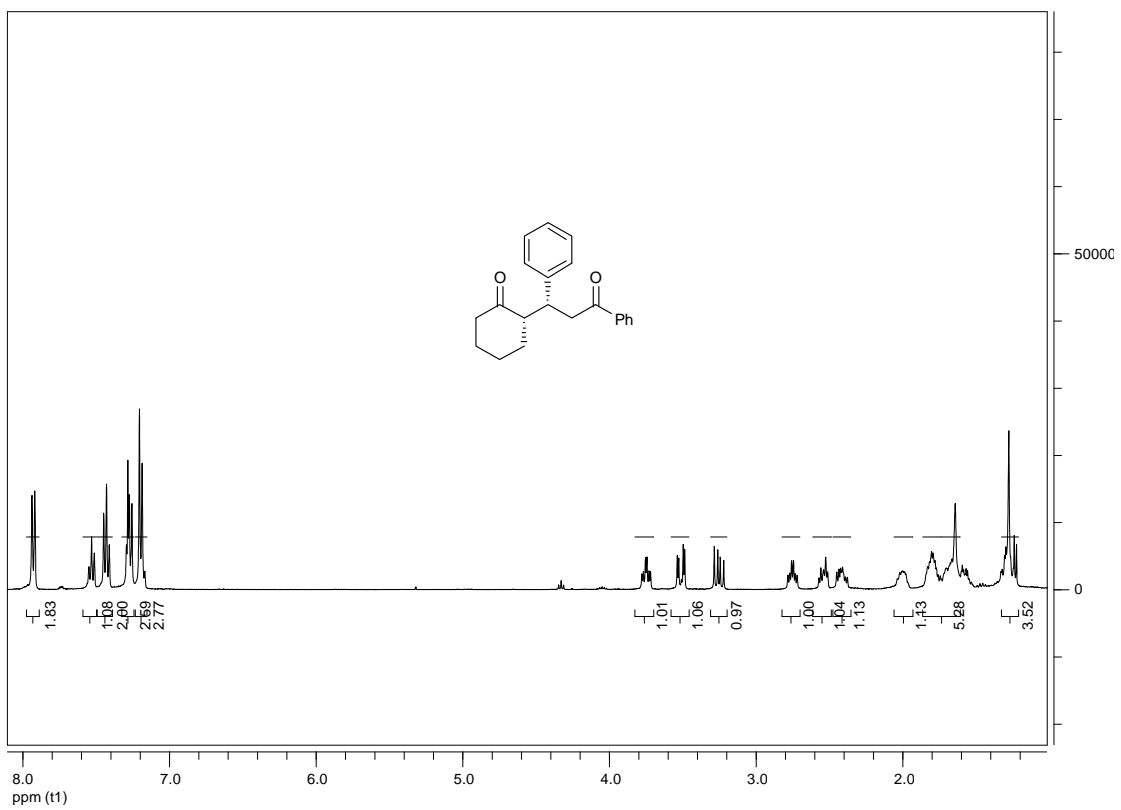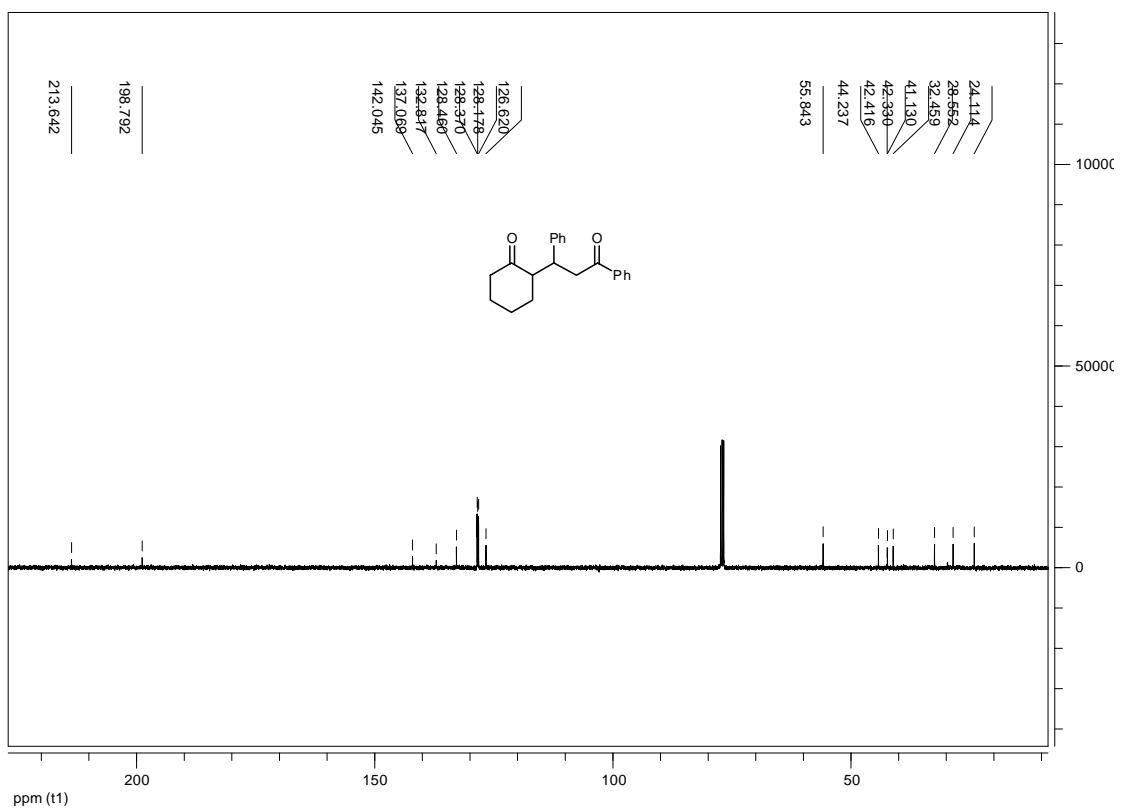

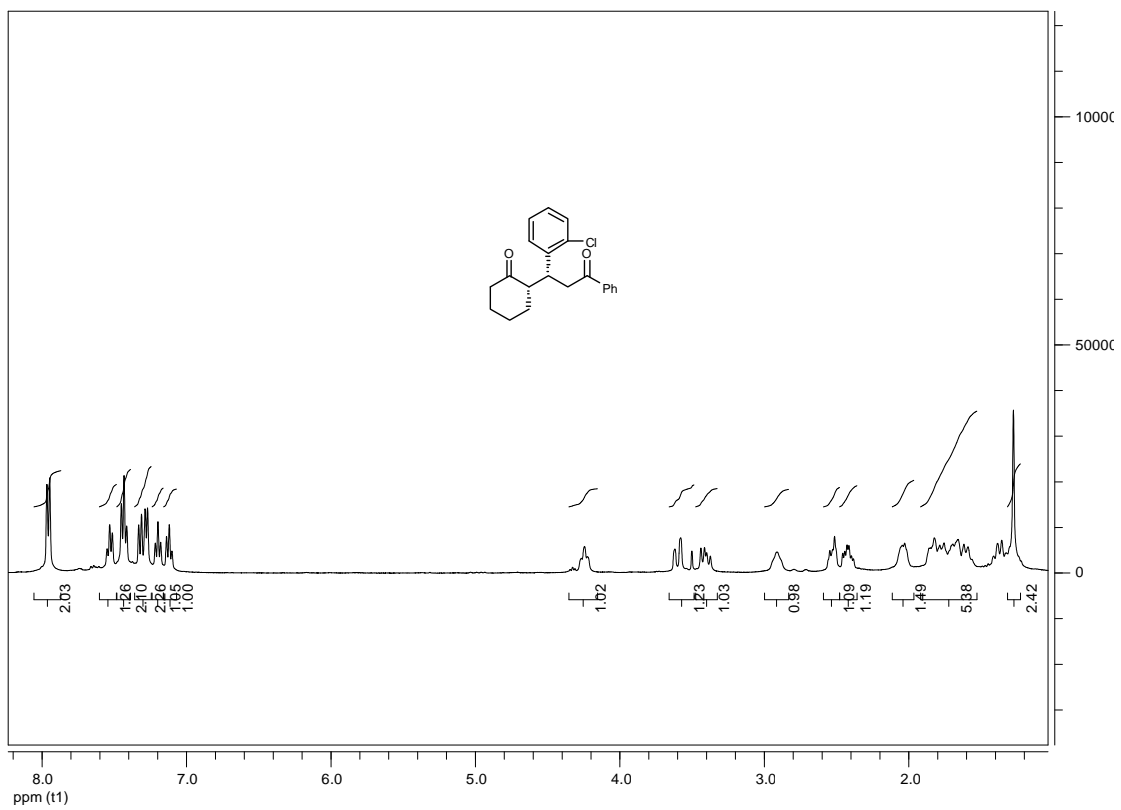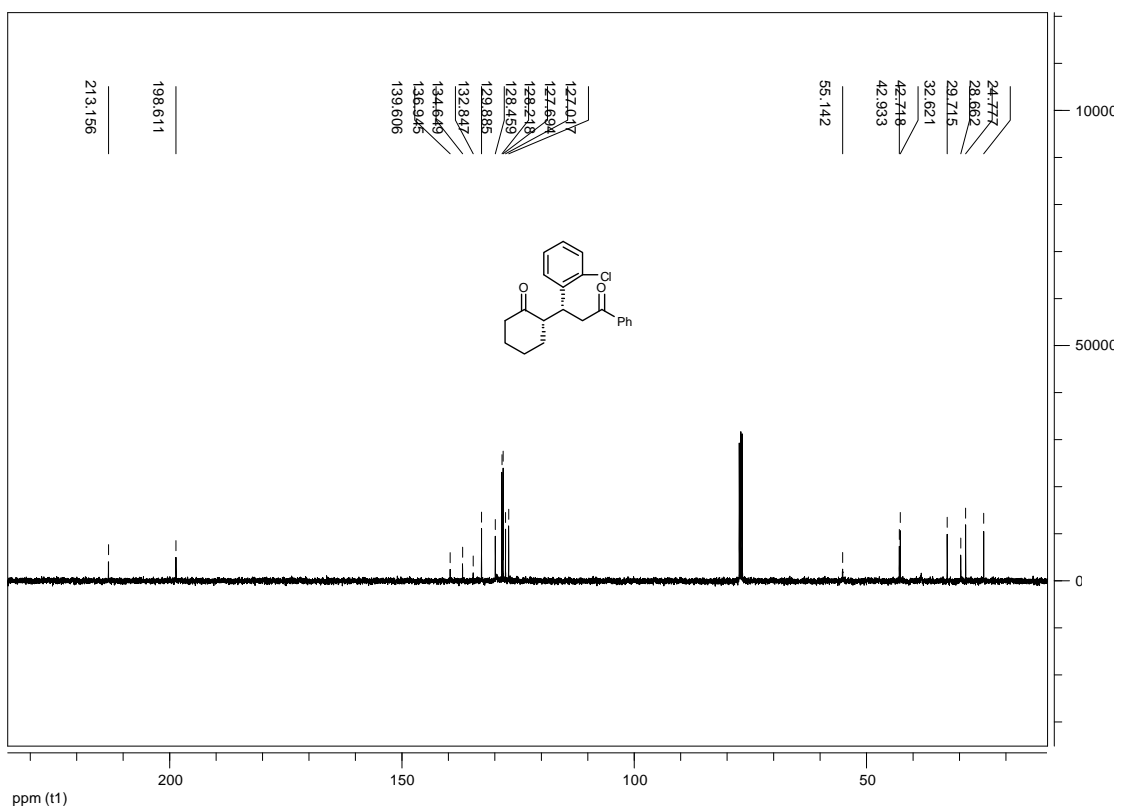

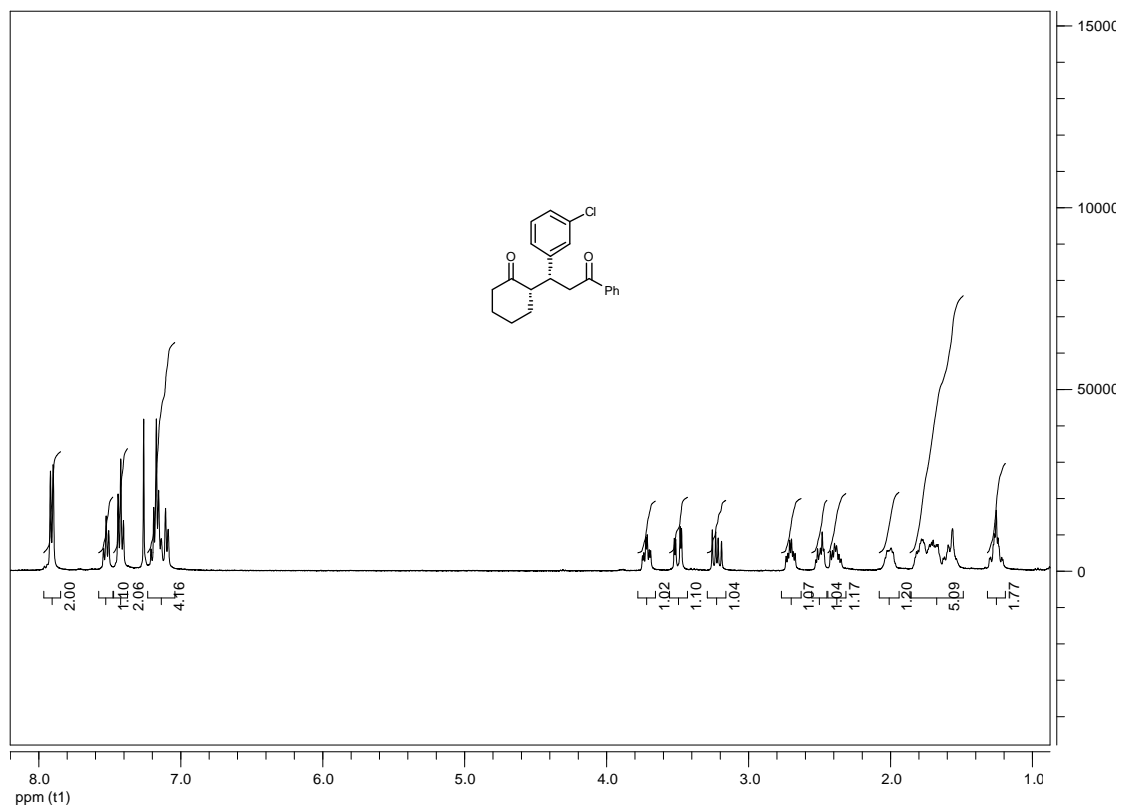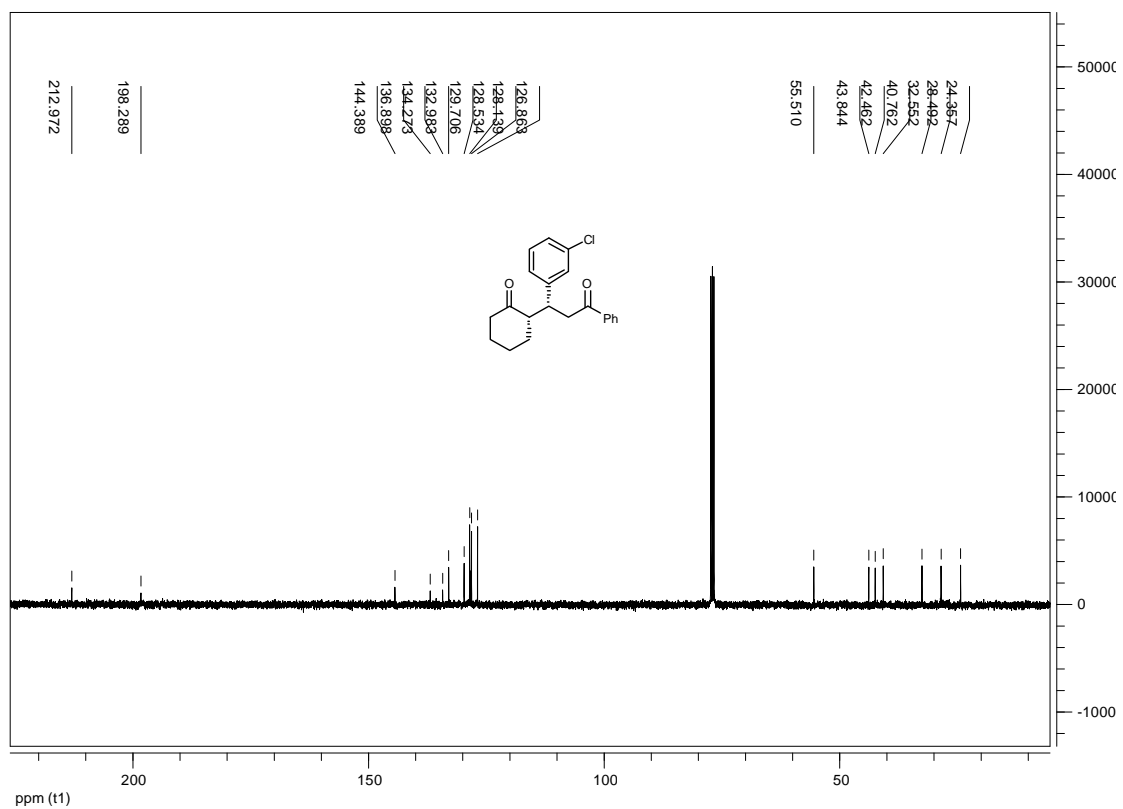



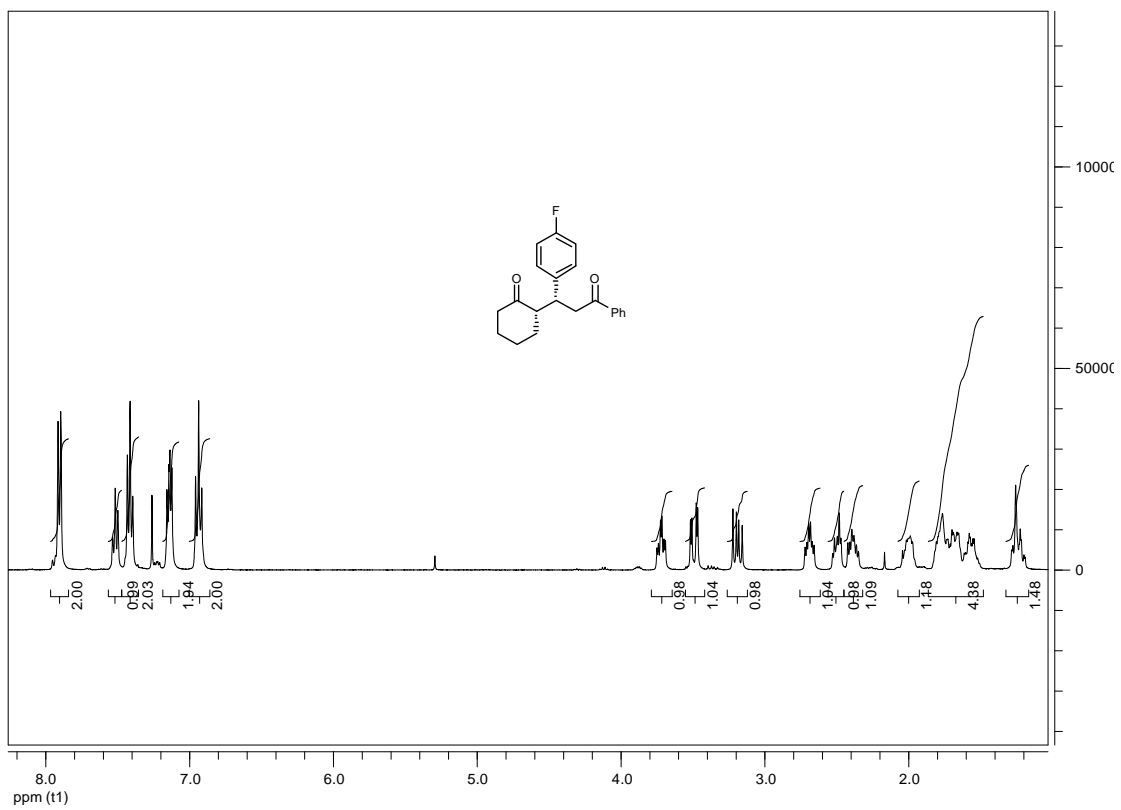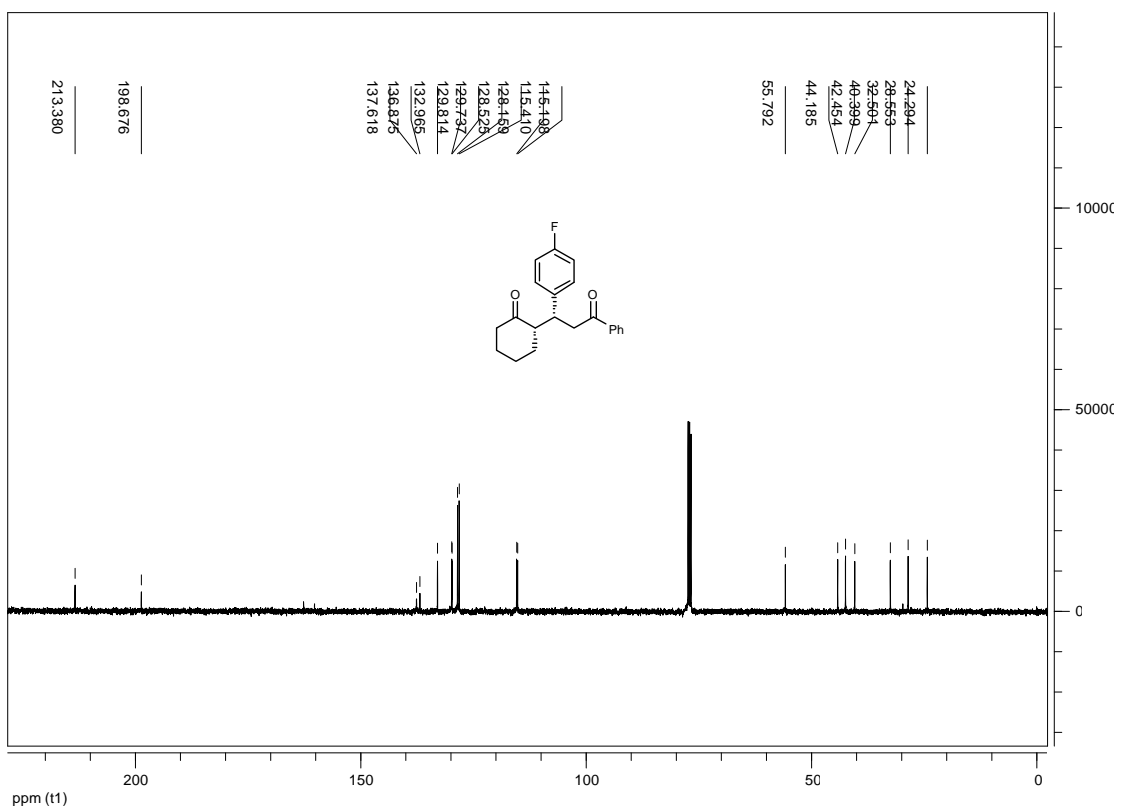

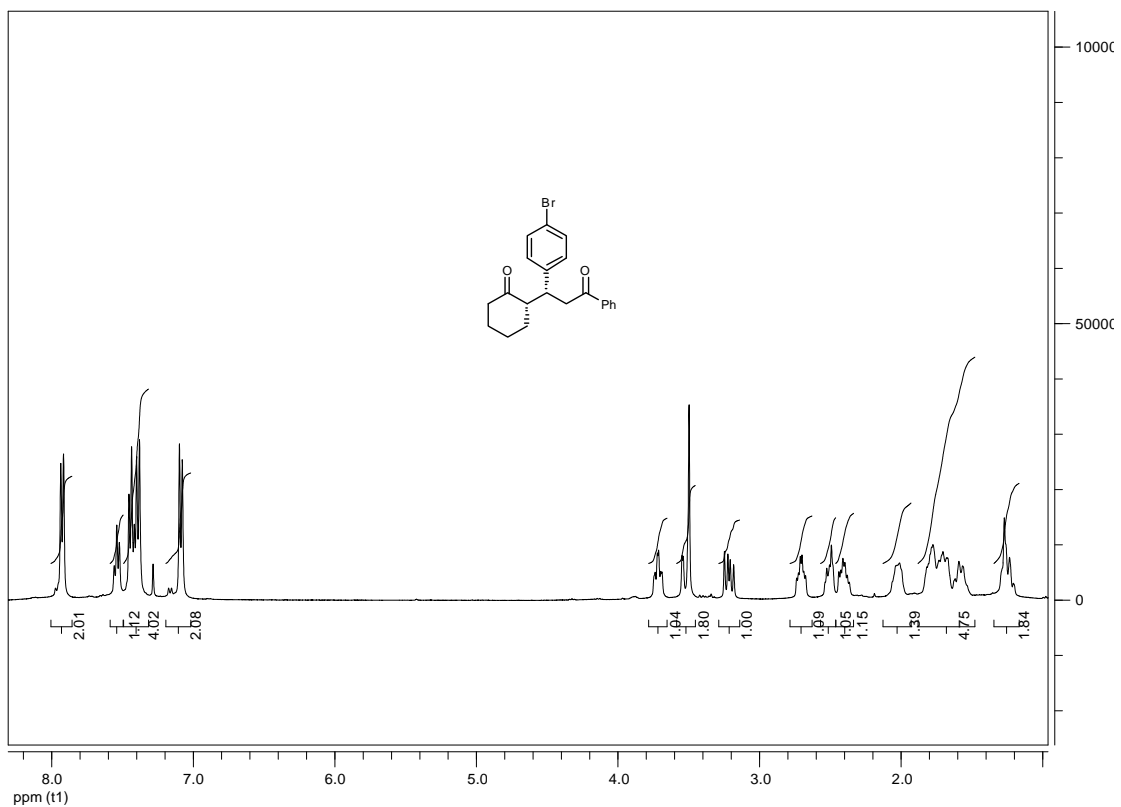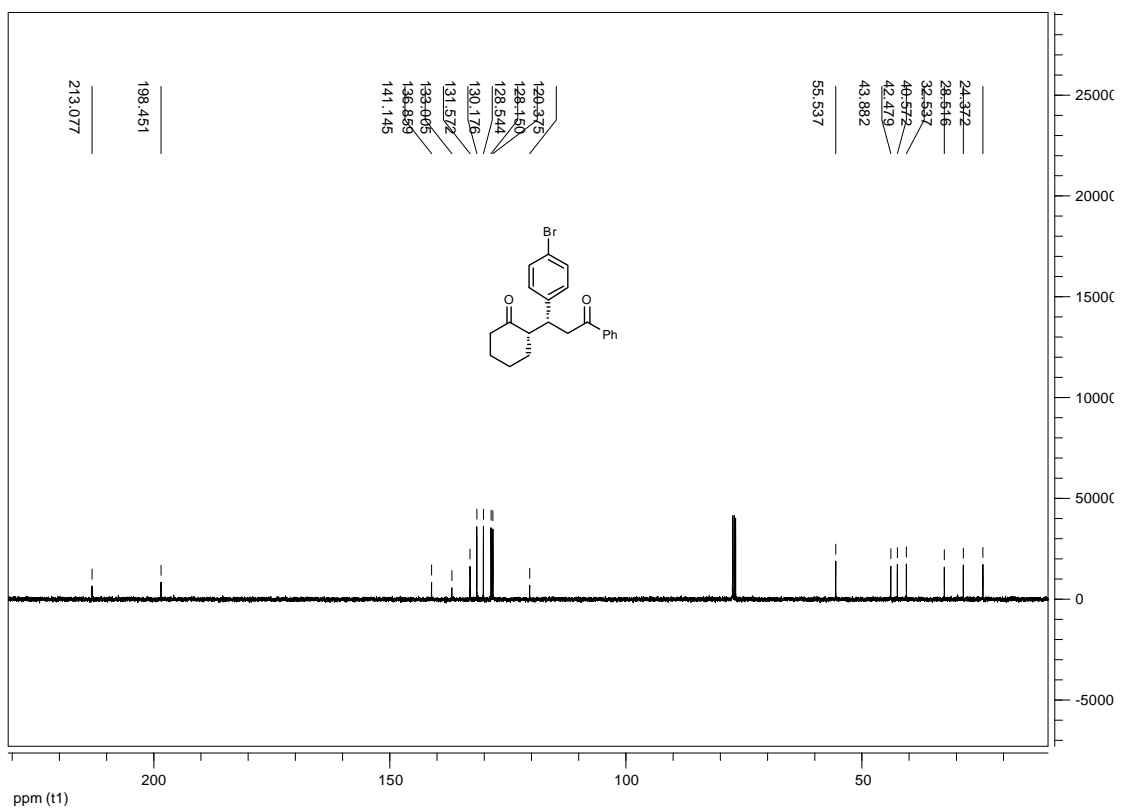

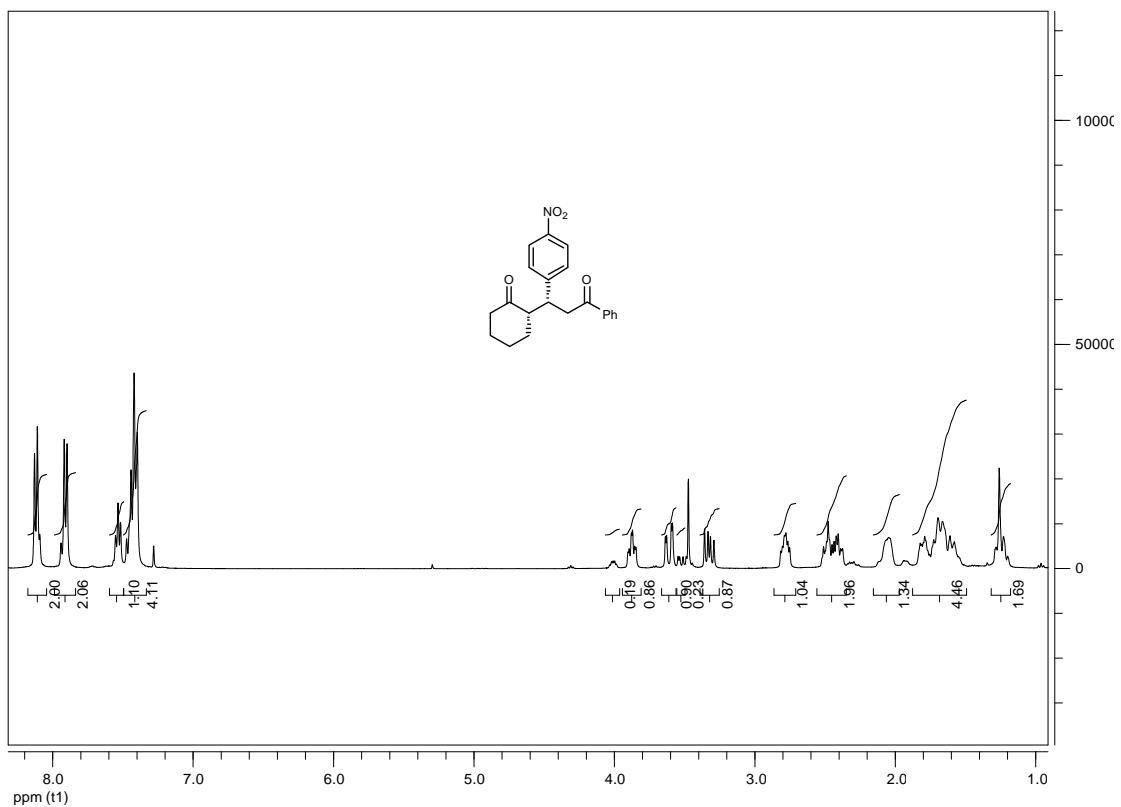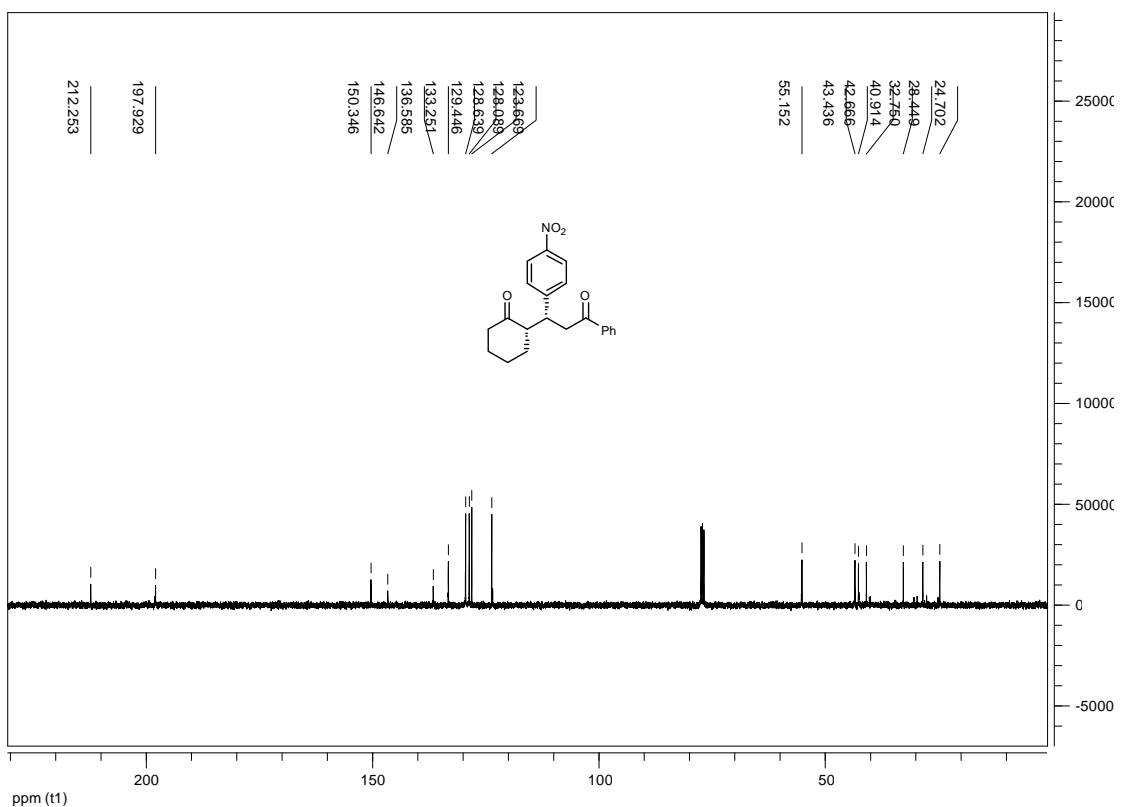

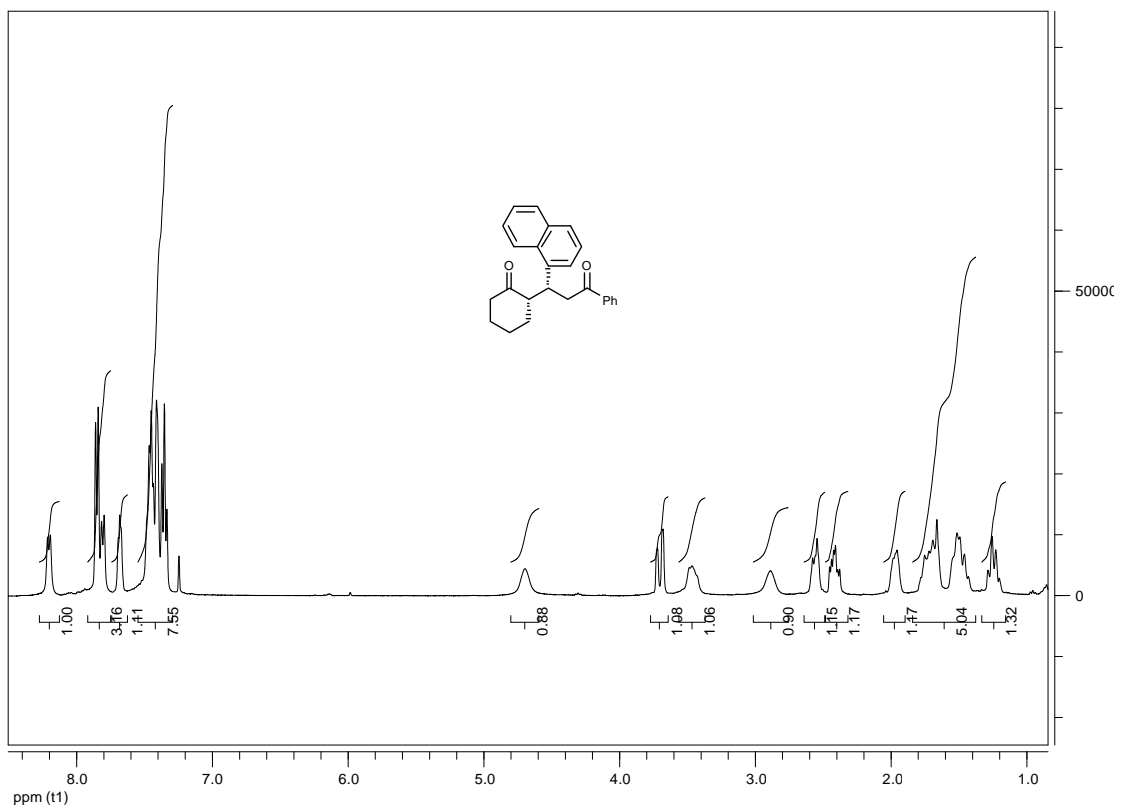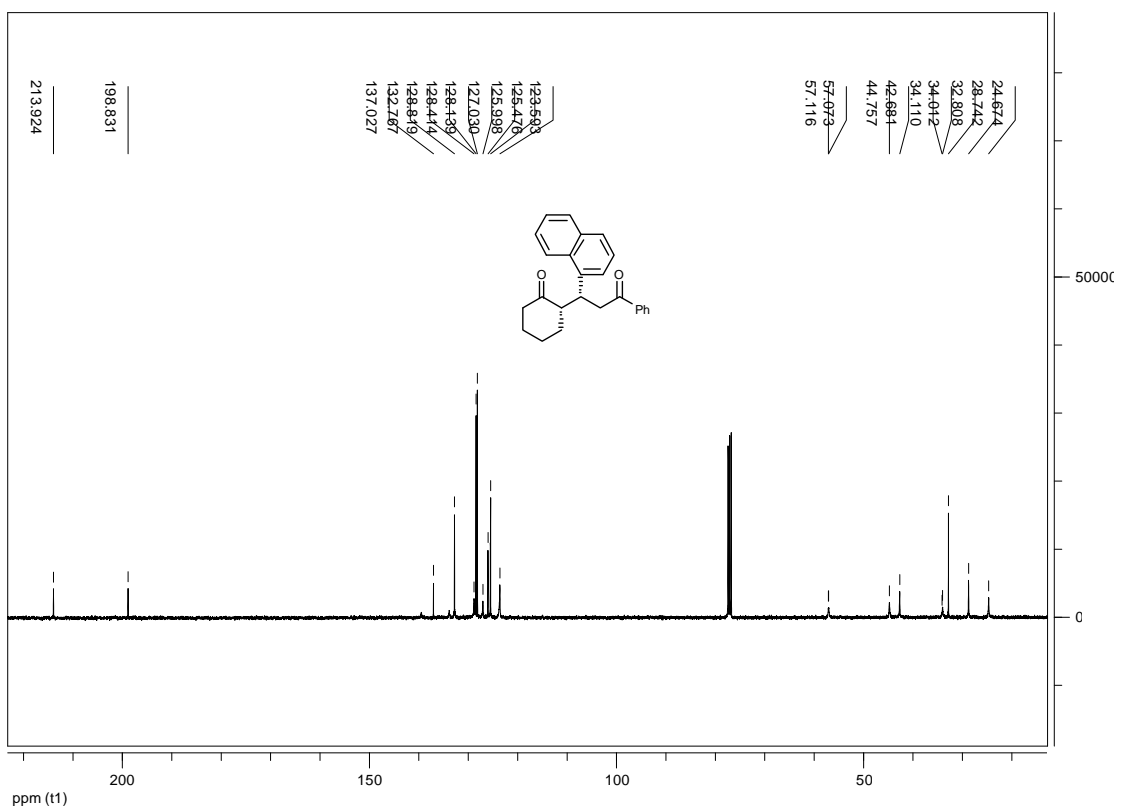

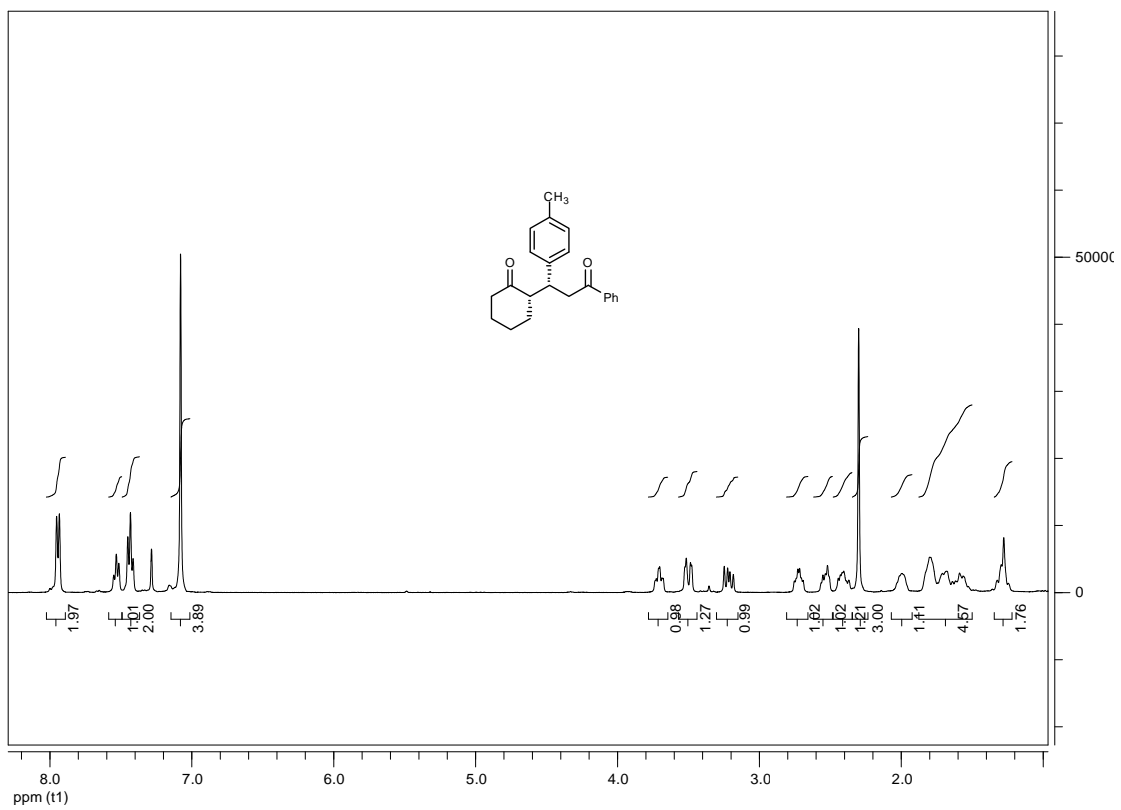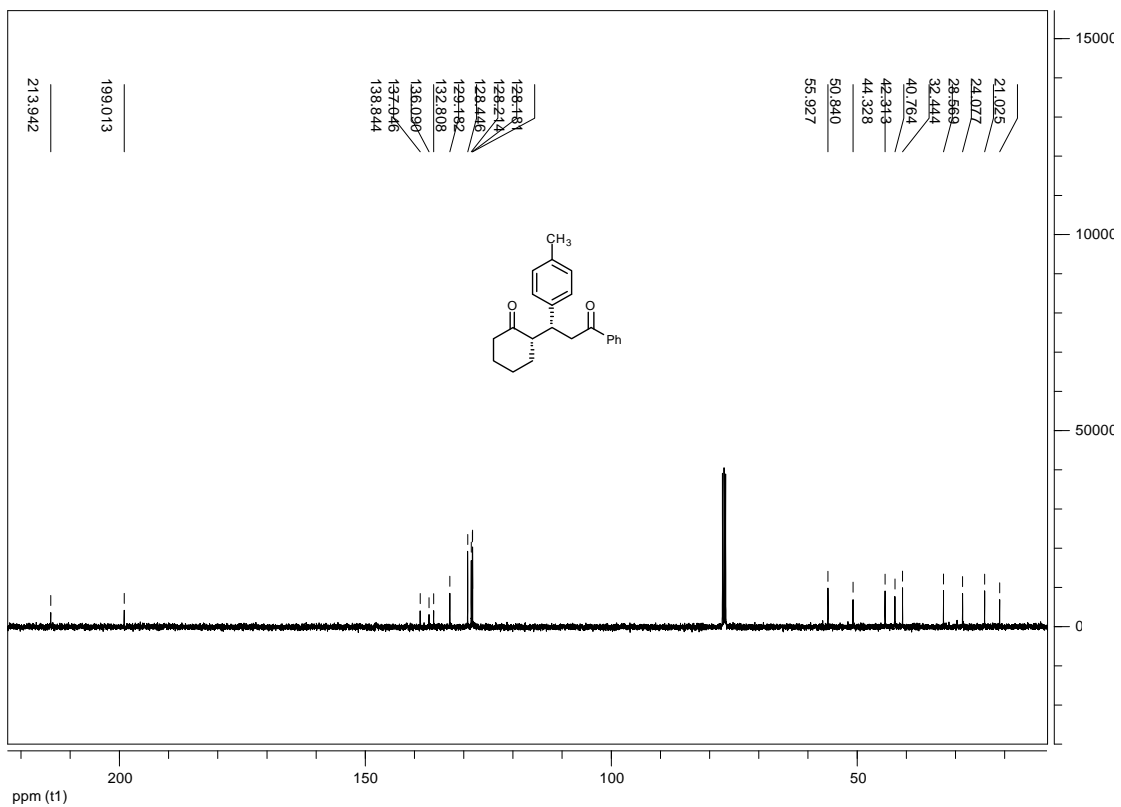

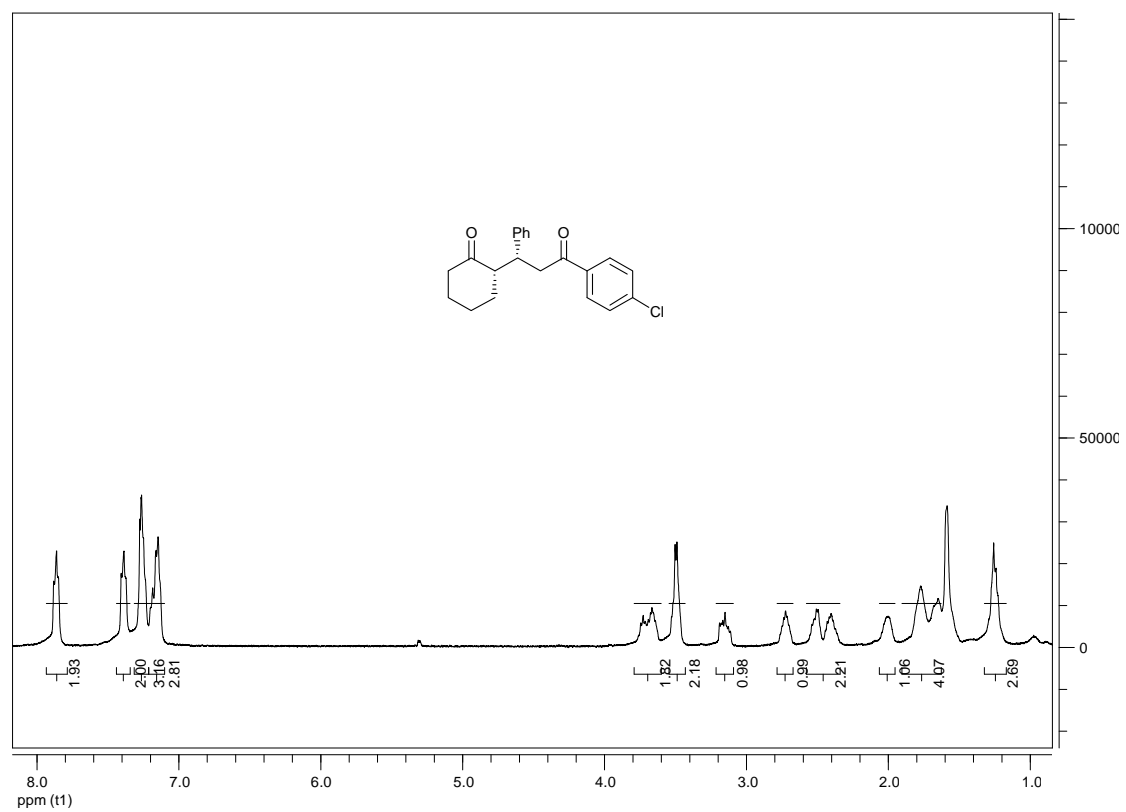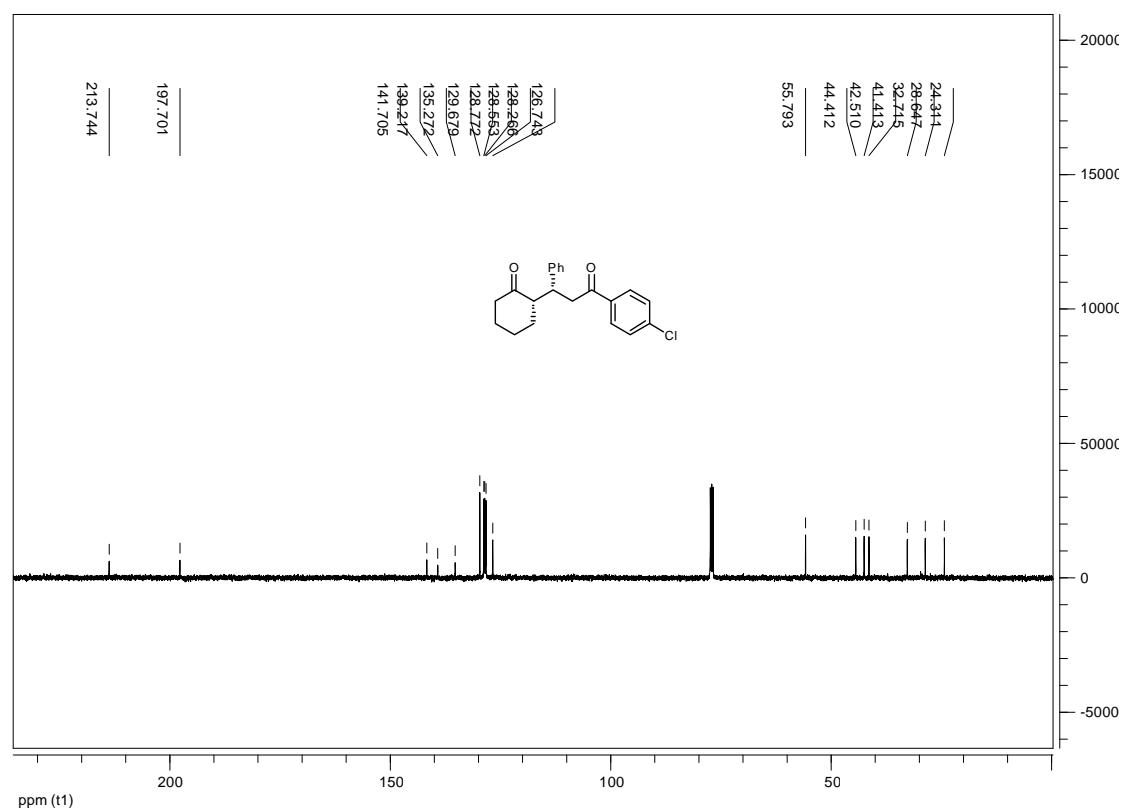

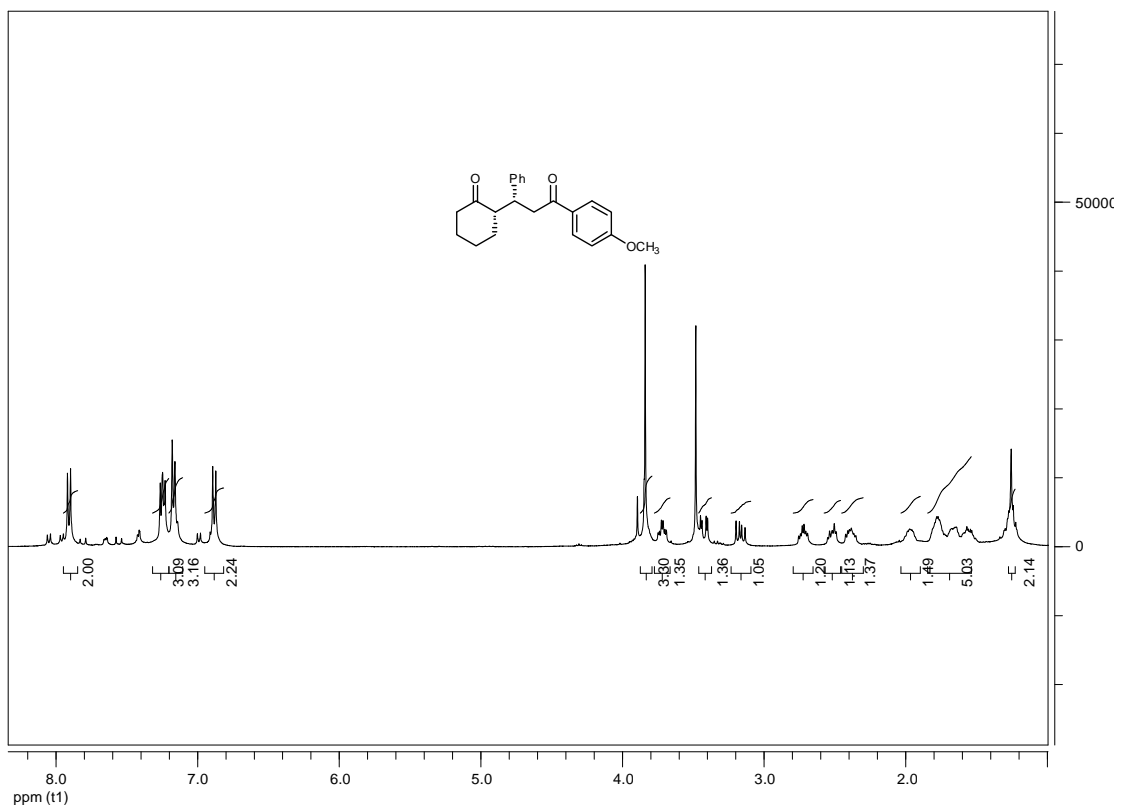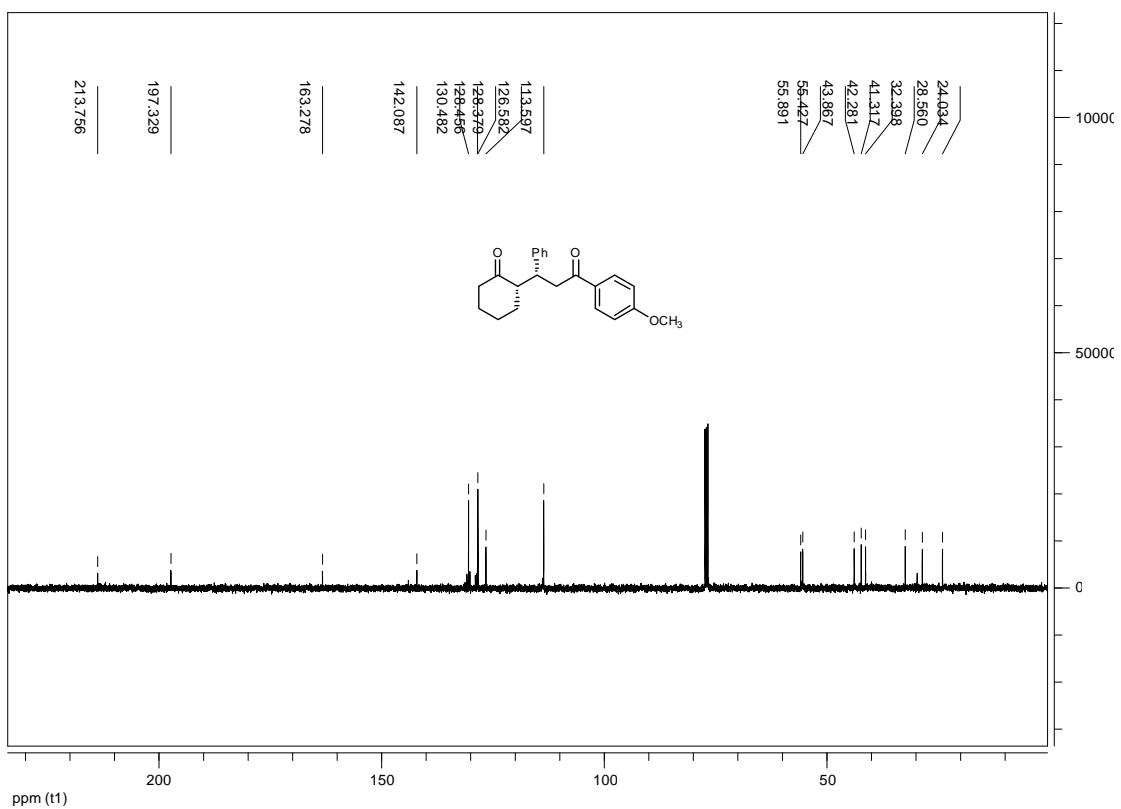

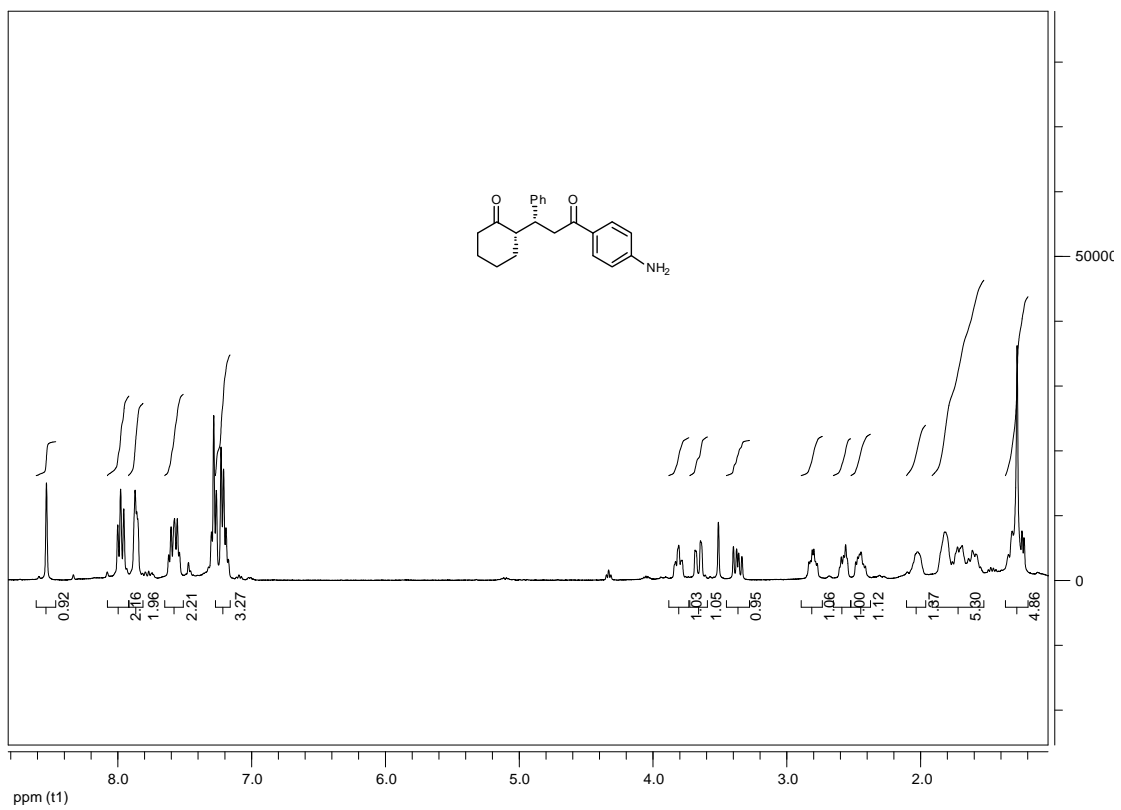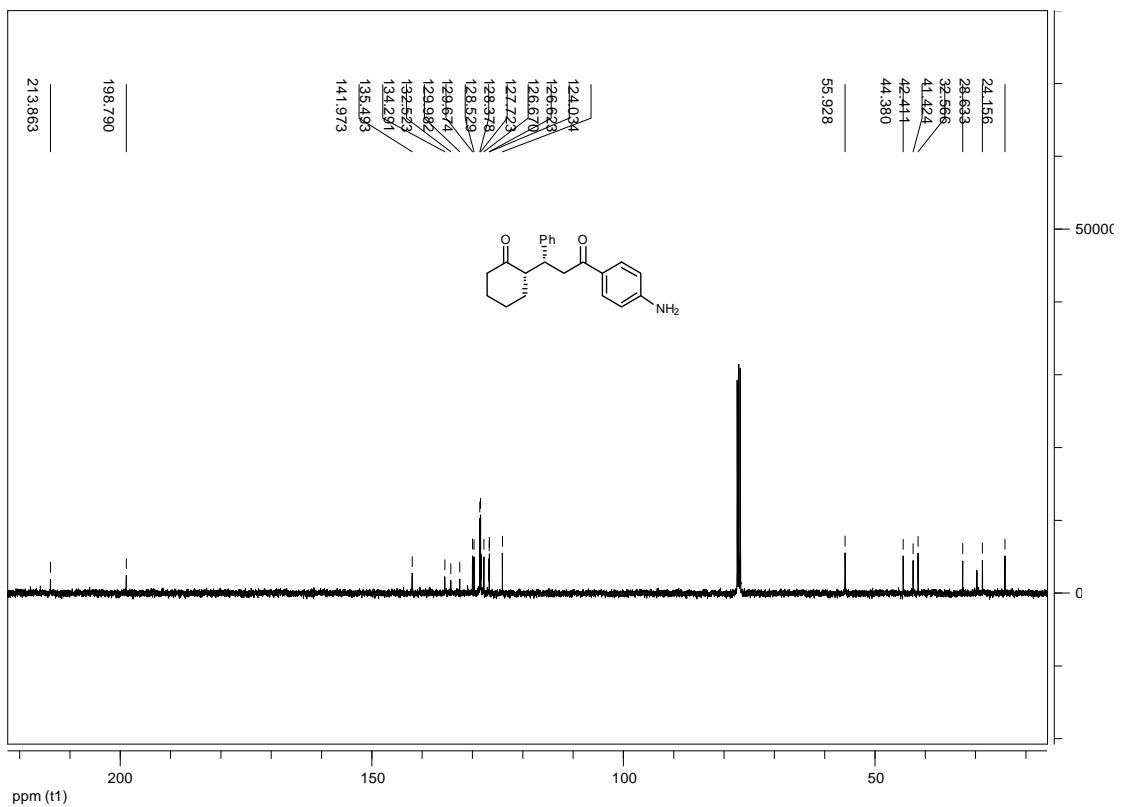



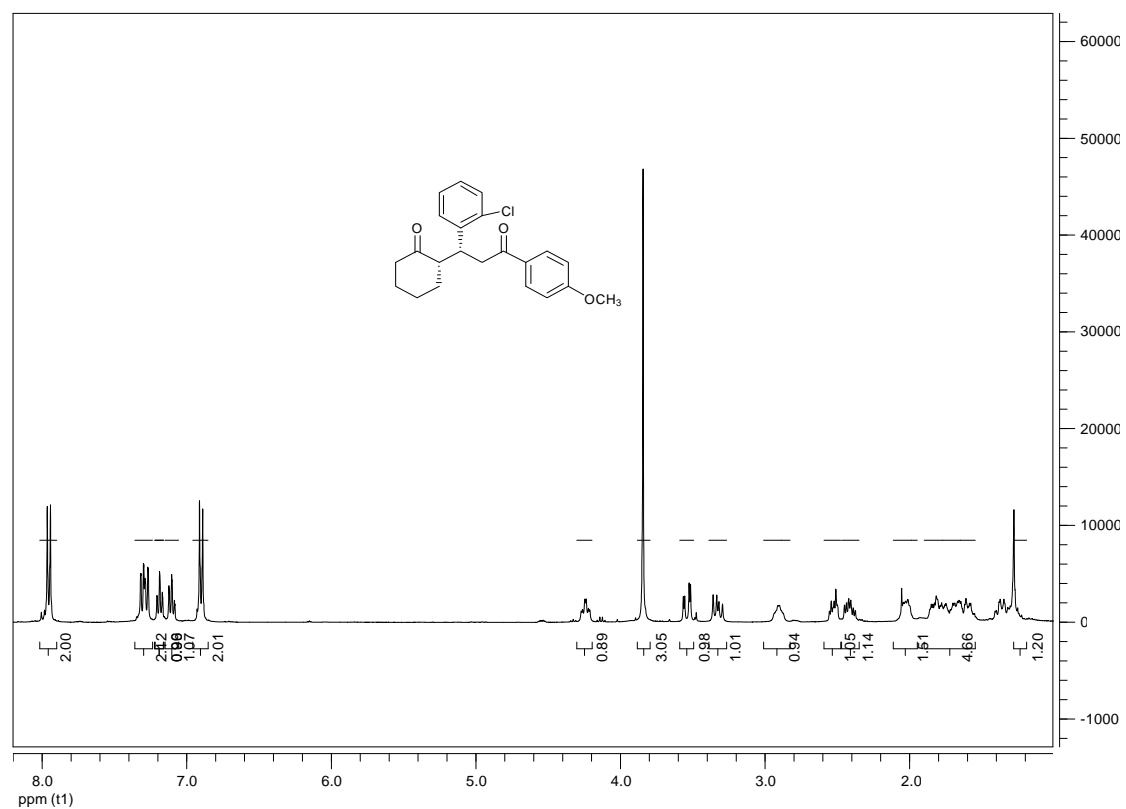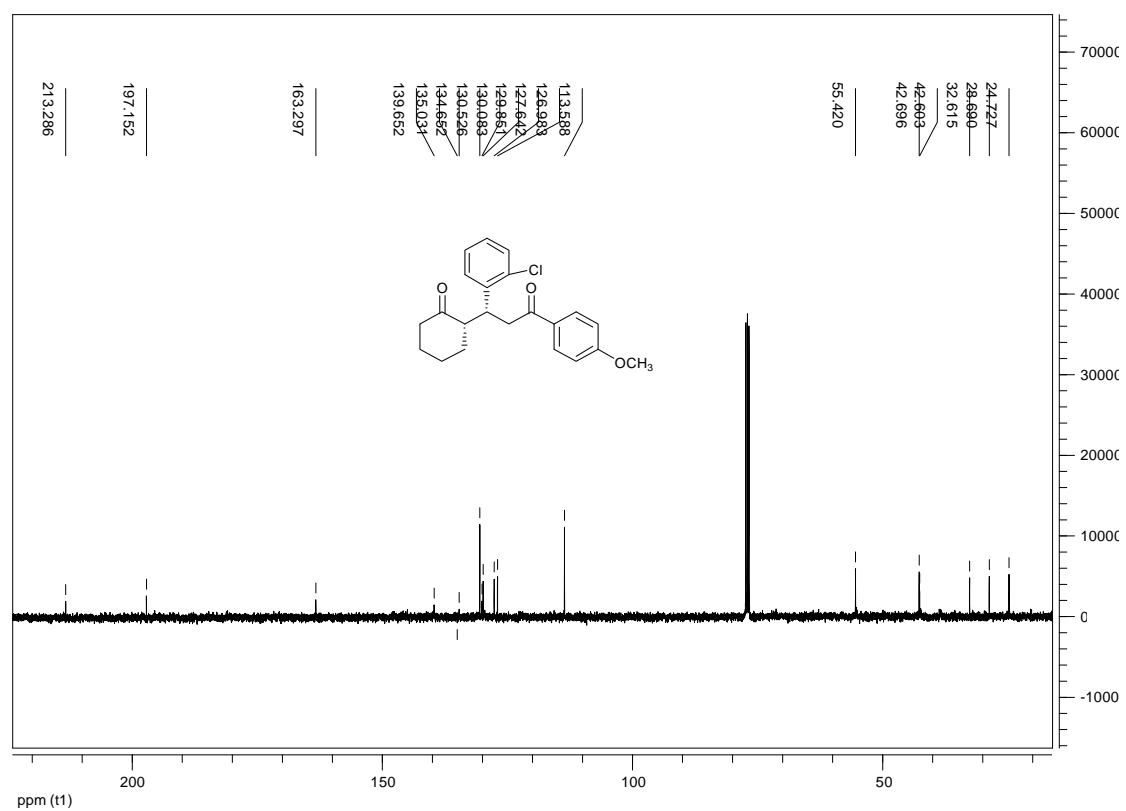

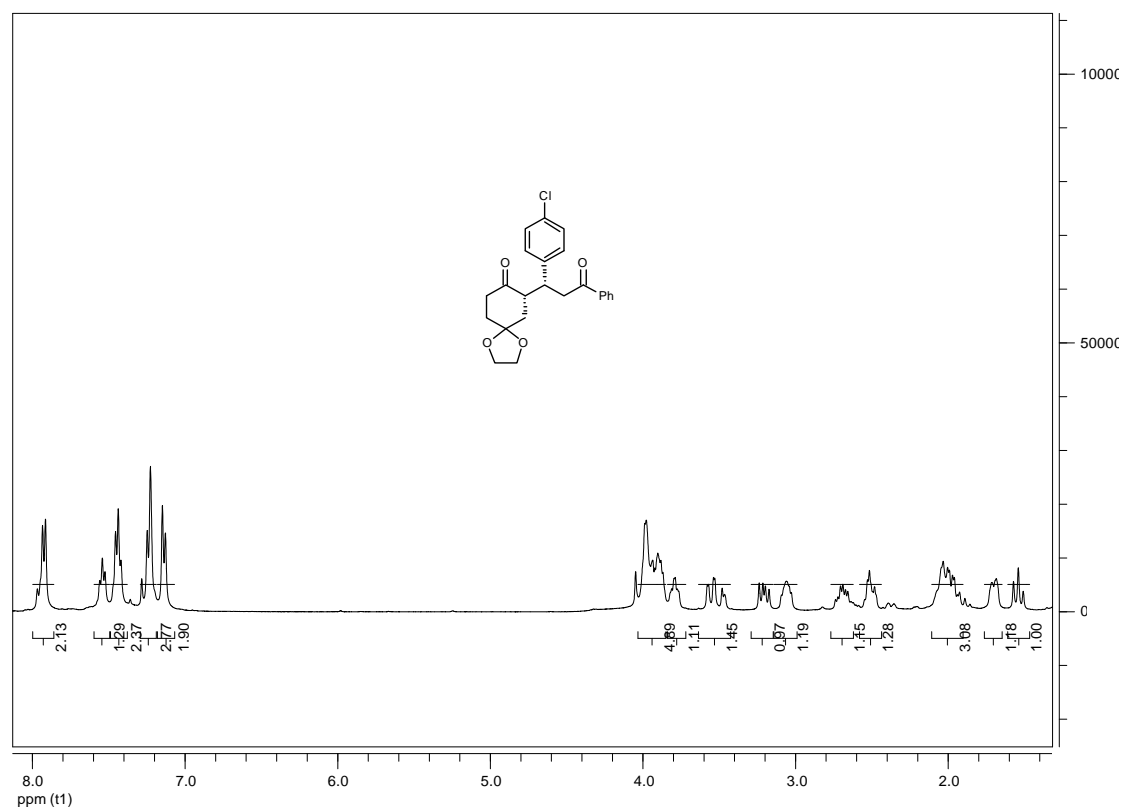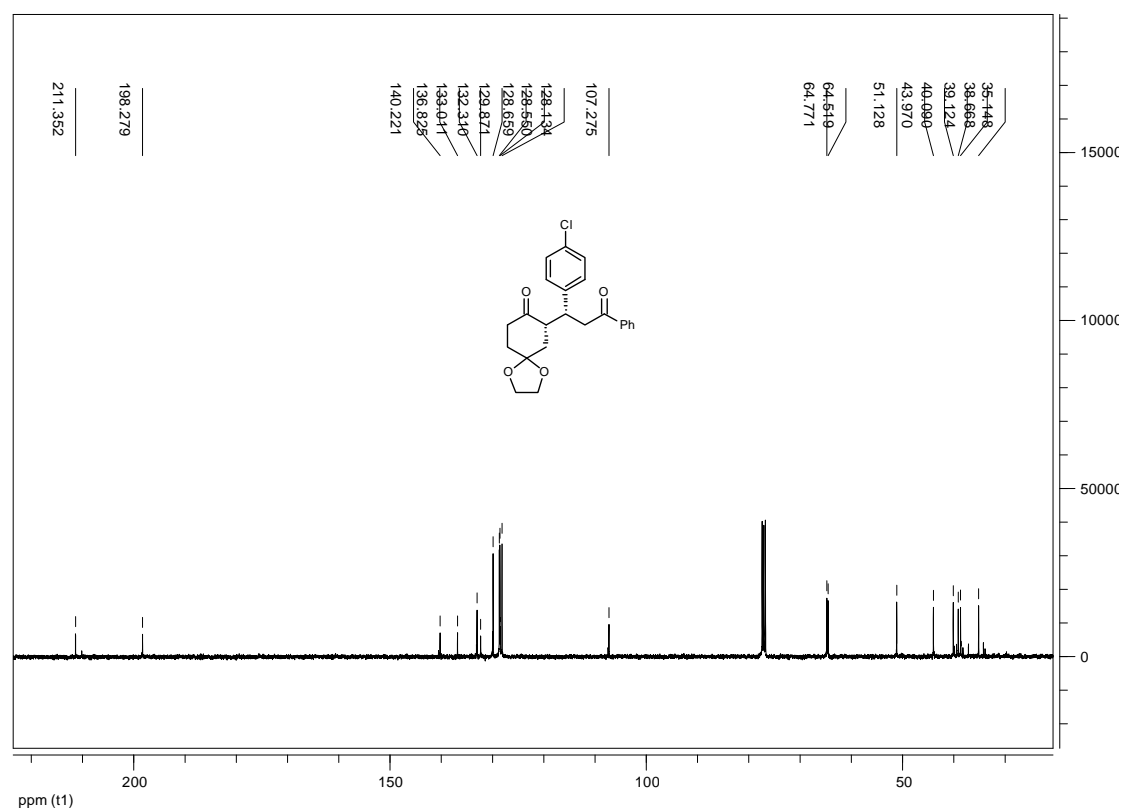

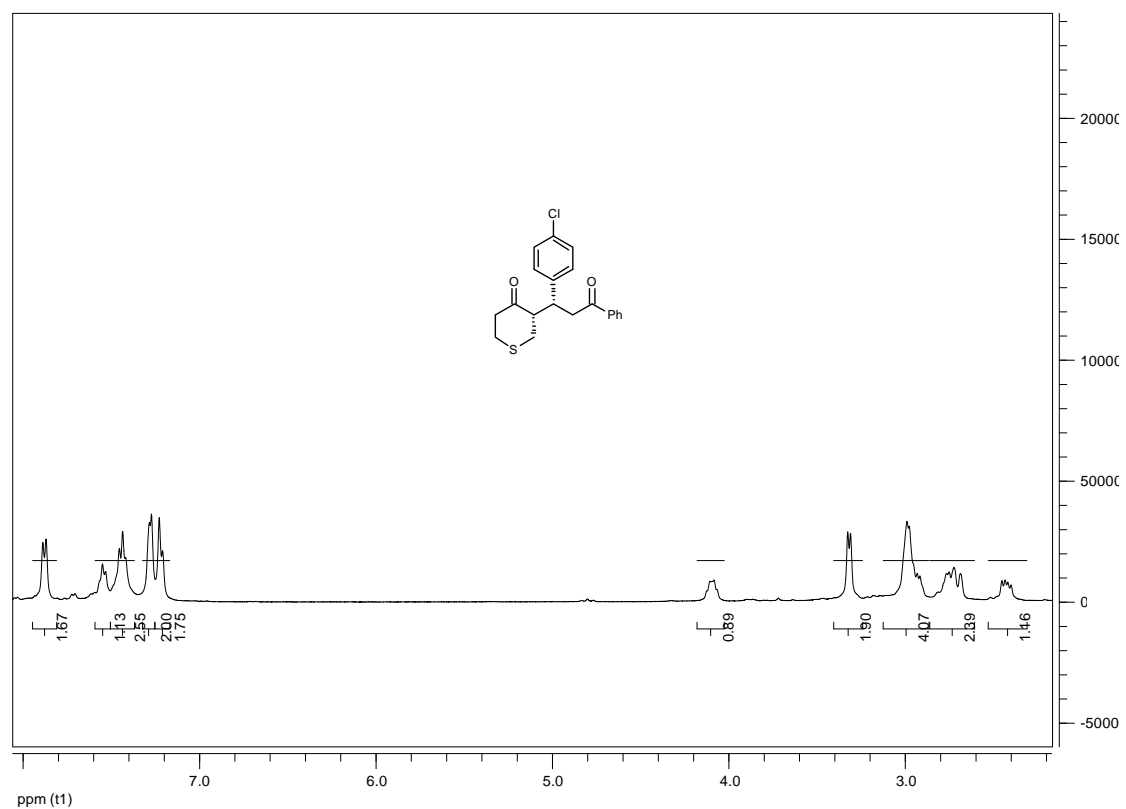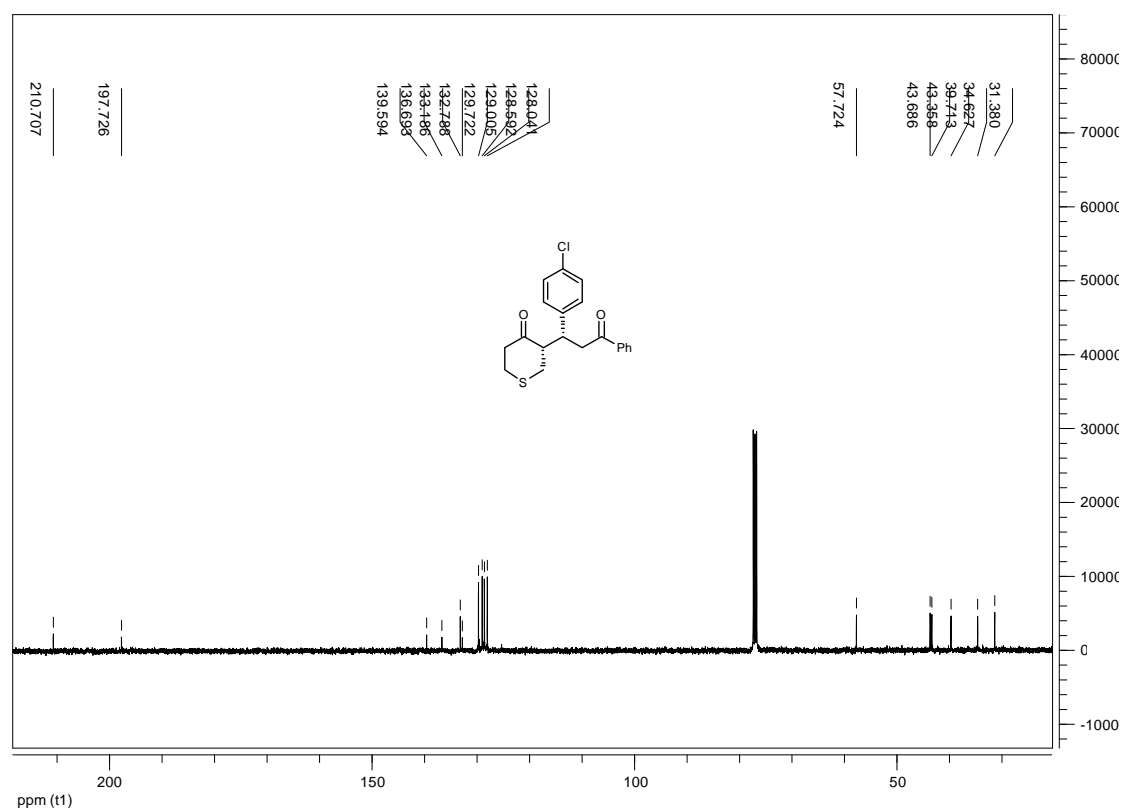

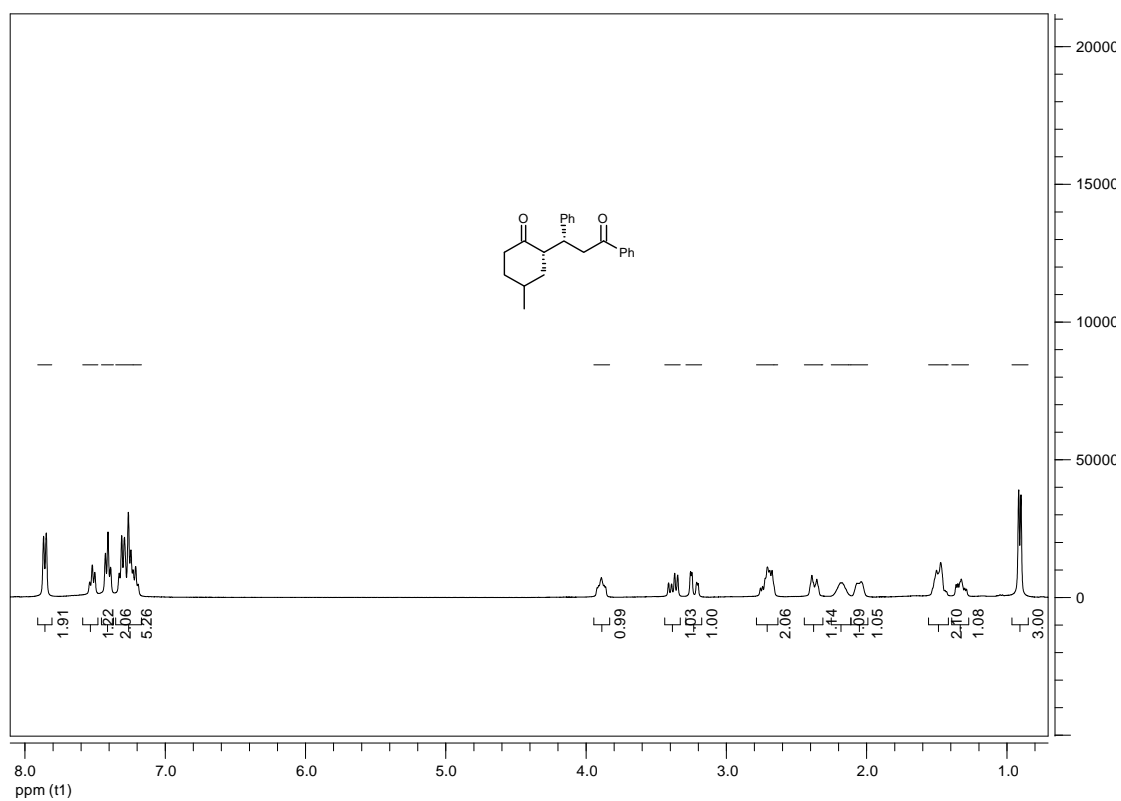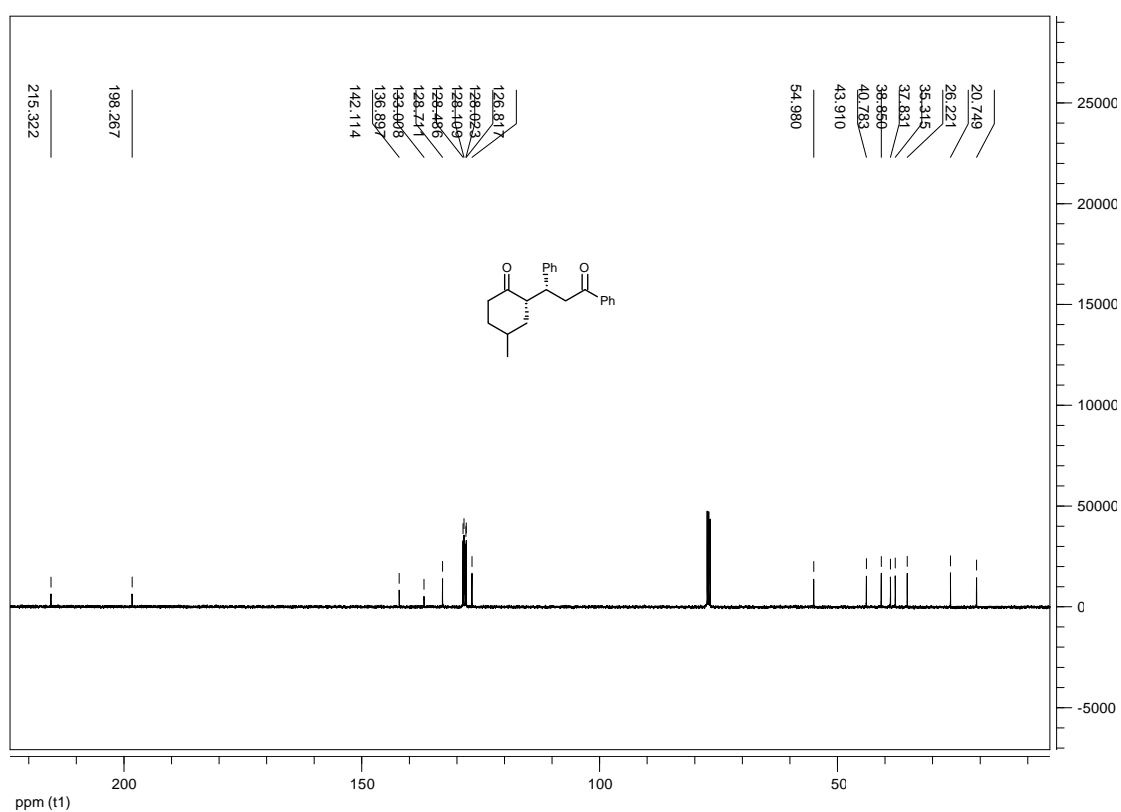

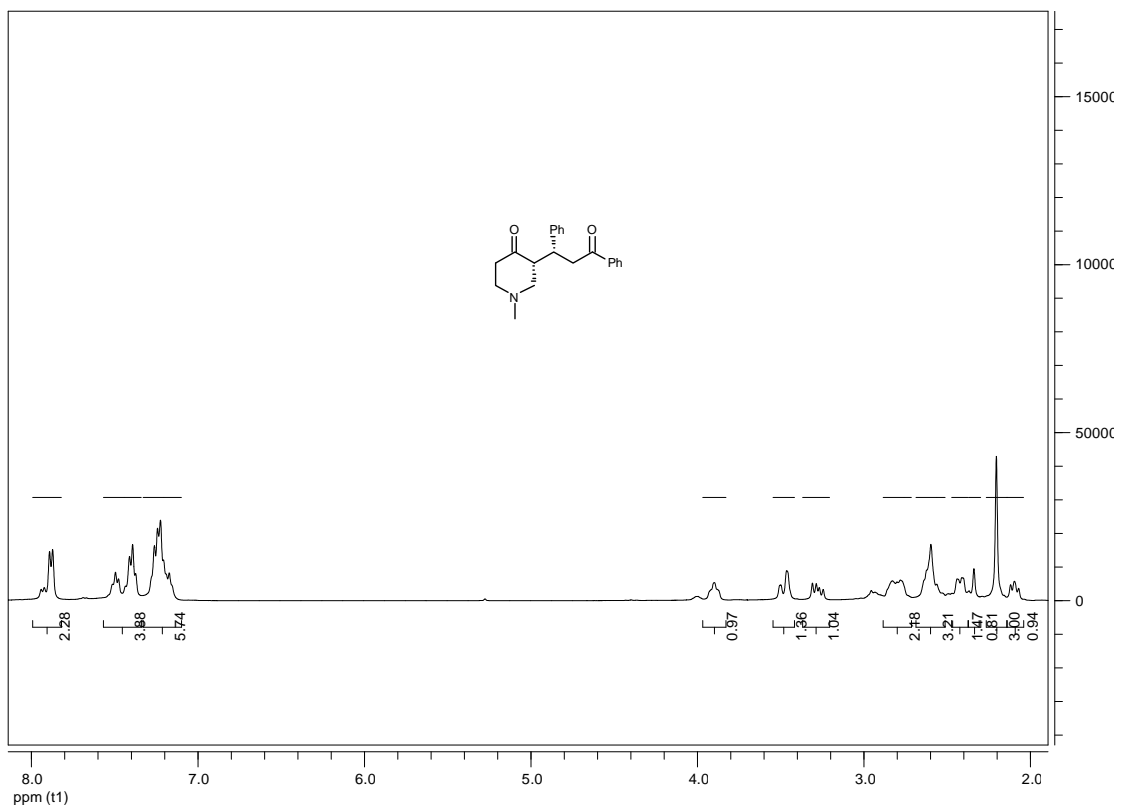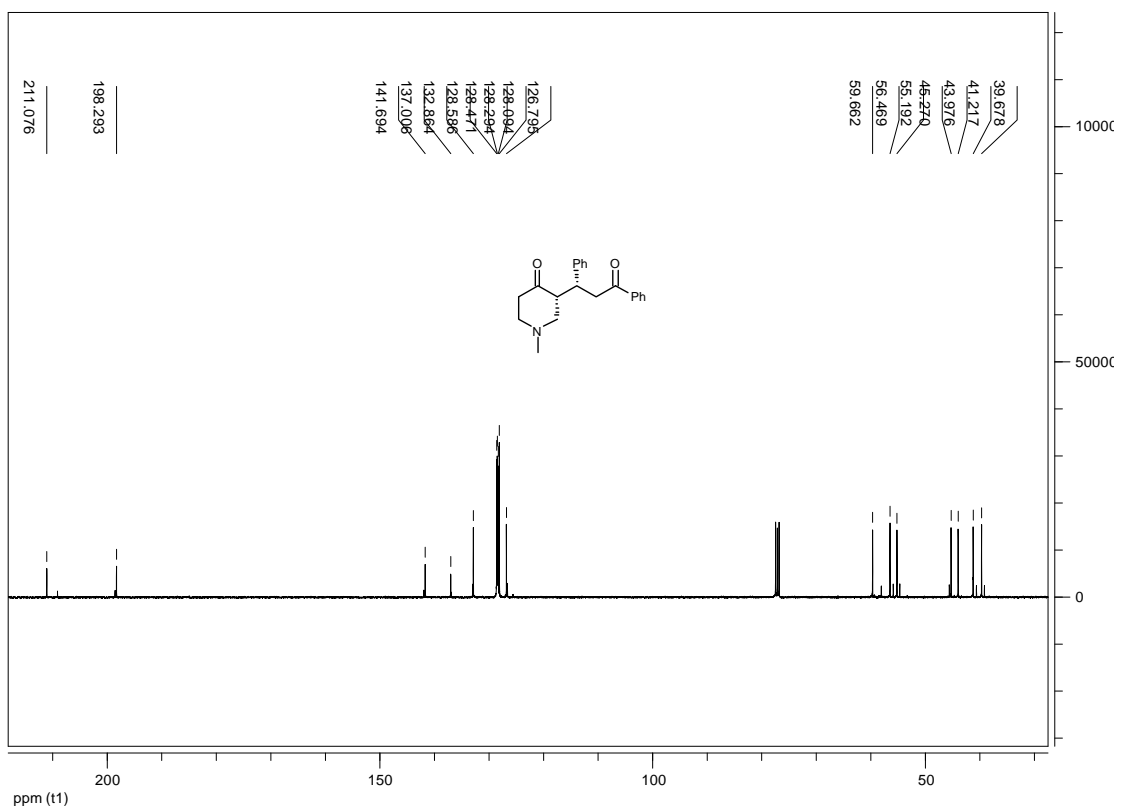

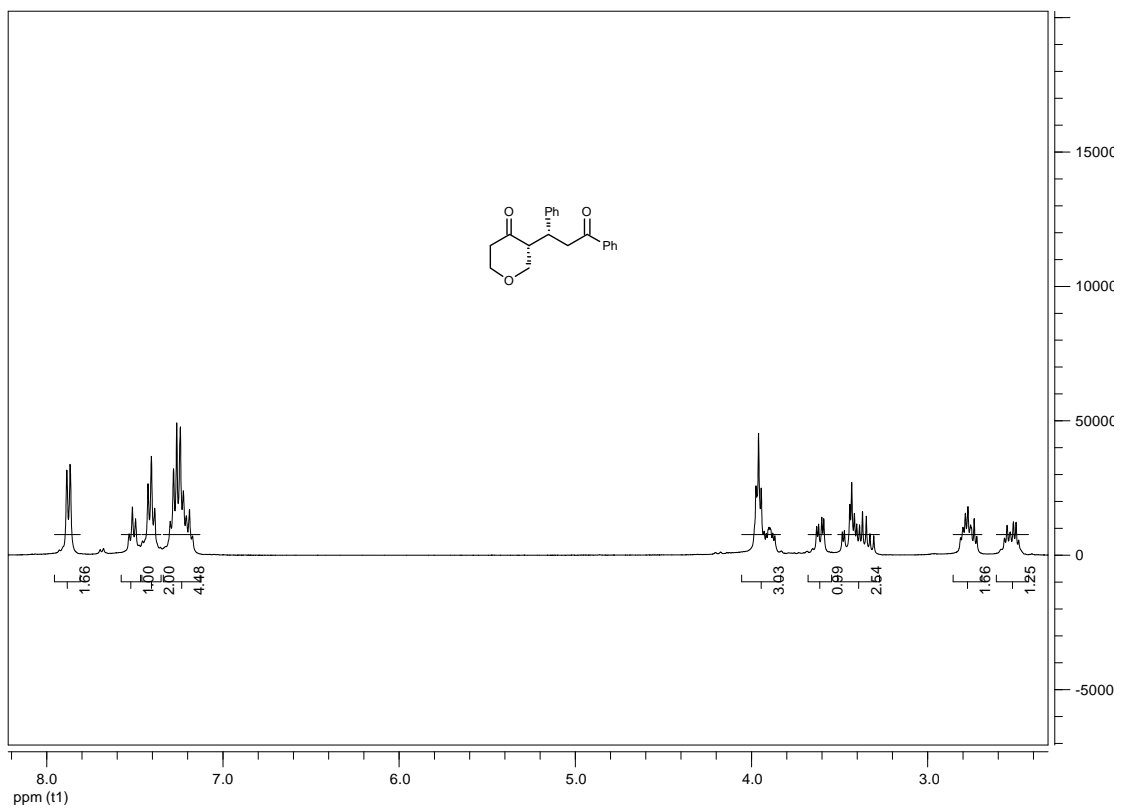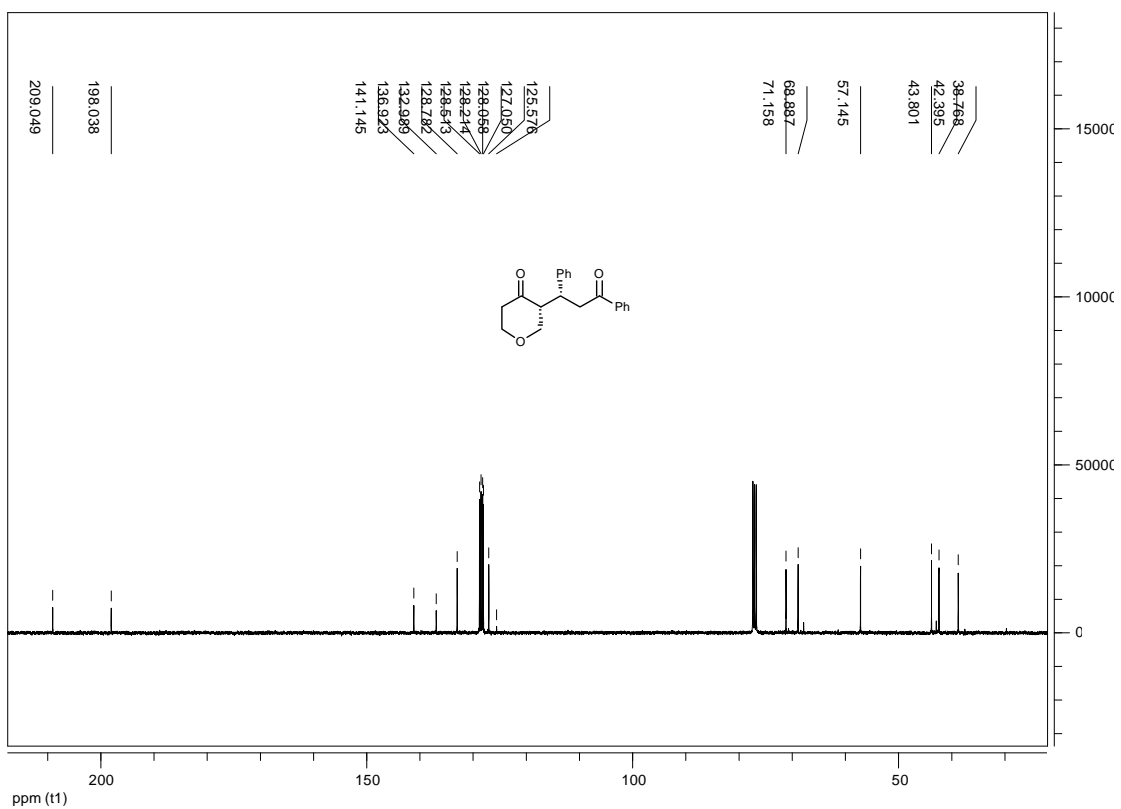

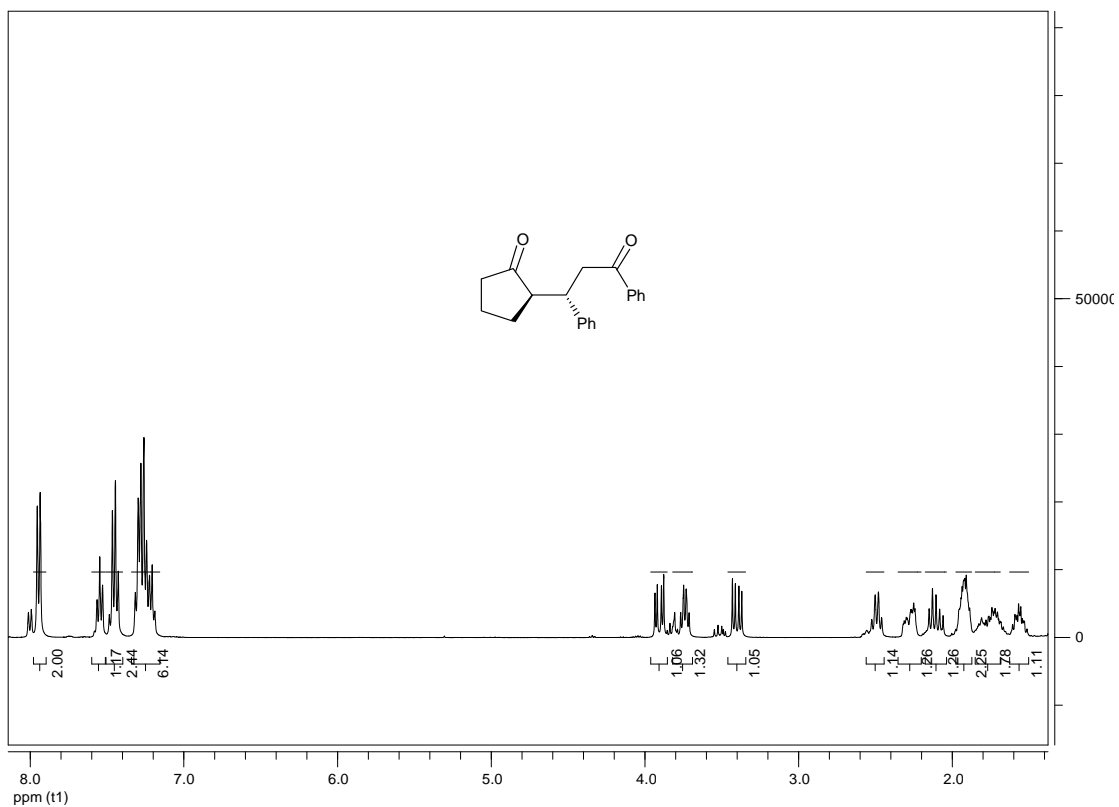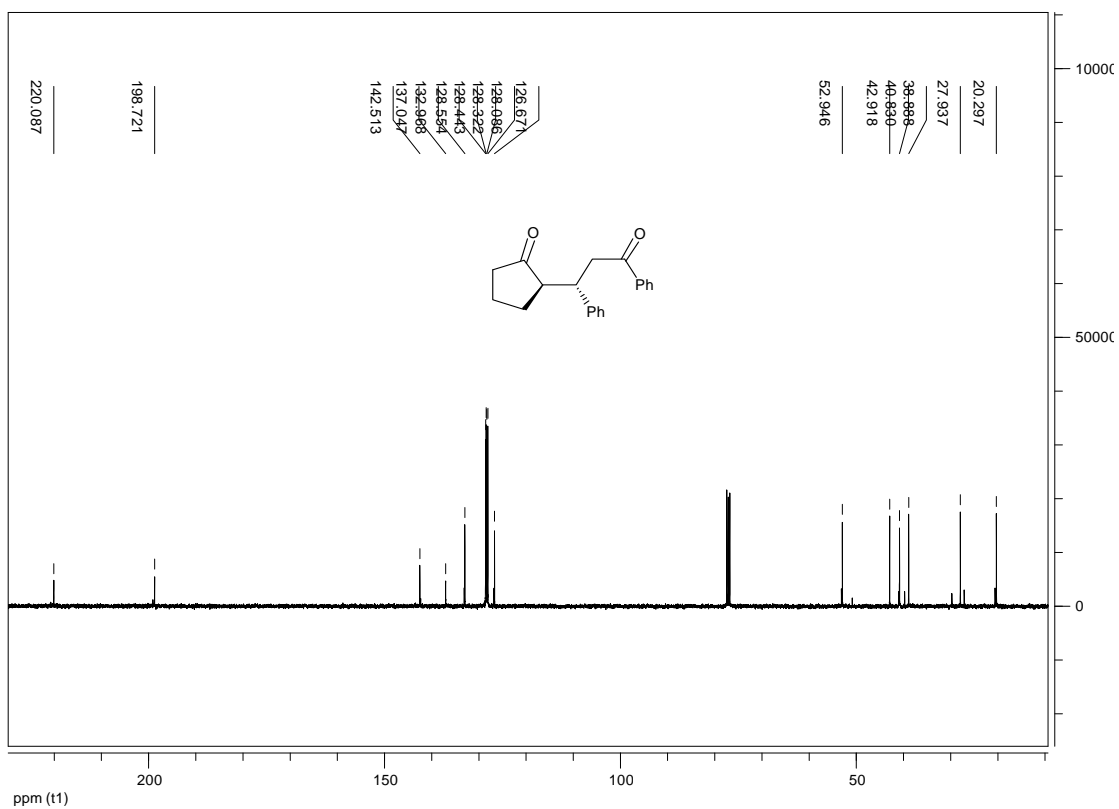

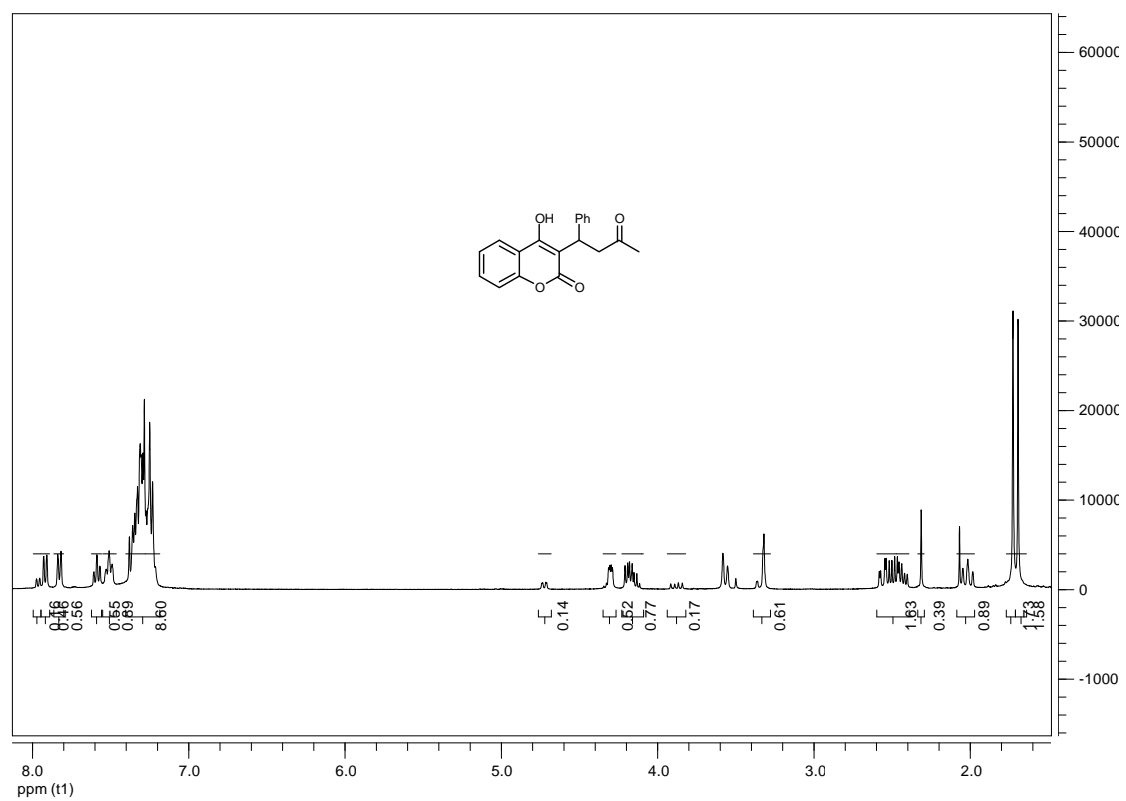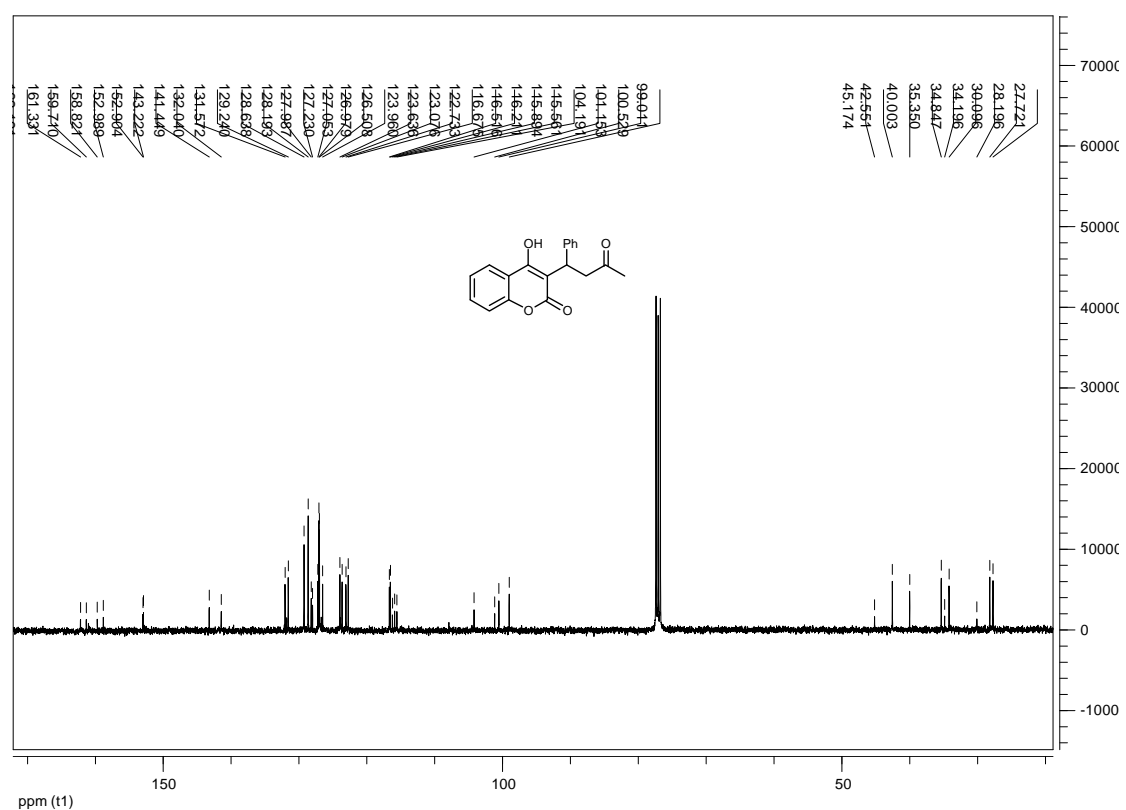



## HPLC of Michael products

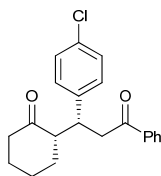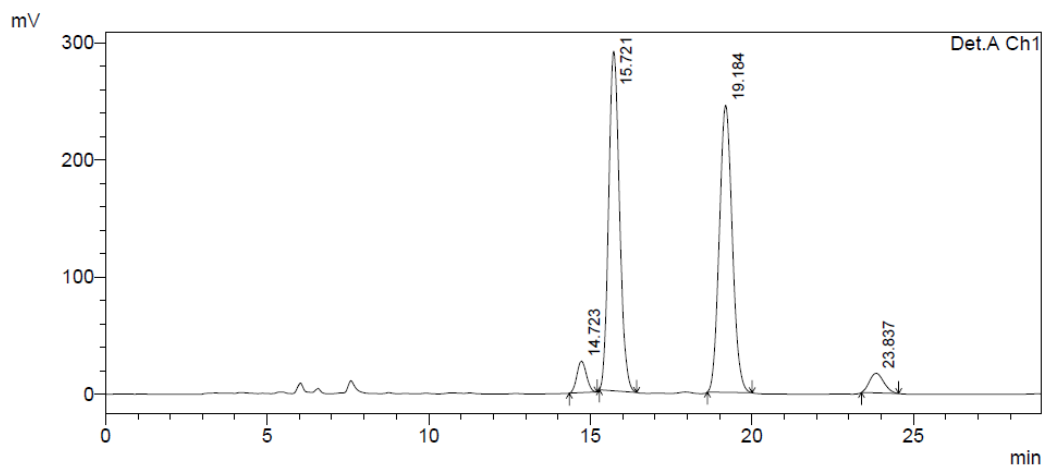

1 Det.A Ch1/254nm

PeakTable

Detector A Ch1 254nm

| Peak# | Ret. Time | Area     | Height | Area %  | Height % |
|-------|-----------|----------|--------|---------|----------|
| 1     | 14.723    | 551129   | 27029  | 3.753   | 4.668    |
| 2     | 15.721    | 6776555  | 290047 | 46.142  | 50.088   |
| 3     | 19.184    | 6839739  | 245223 | 46.572  | 42.347   |
| 4     | 23.837    | 518887   | 16777  | 3.533   | 2.897    |
| Total |           | 14686309 | 579076 | 100.000 | 100.000  |

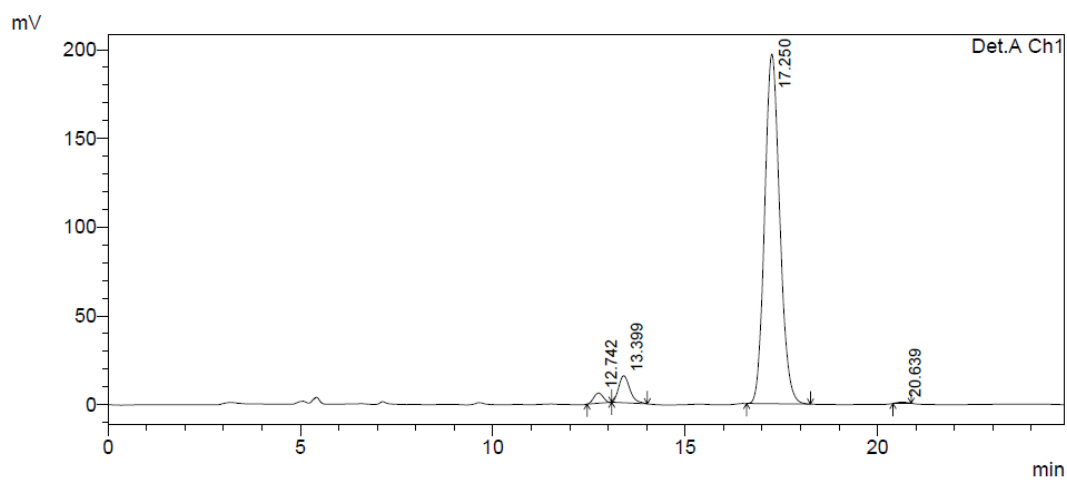

1 Det.A Ch1/254nm

PeakTable

Detector A Ch1 254nm

| Peak# | Ret. Time | Area    | Height | Area %  | Height % |
|-------|-----------|---------|--------|---------|----------|
| 1     | 12.742    | 97246   | 5740   | 1.679   | 2.626    |
| 2     | 13.399    | 306519  | 15177  | 5.293   | 6.942    |
| 3     | 17.250    | 5375315 | 197021 | 92.824  | 90.125   |
| 4     | 20.639    | 11806   | 670    | 0.204   | 0.306    |
| Total |           | 5790886 | 218607 | 100.000 | 100.000  |

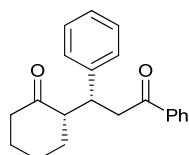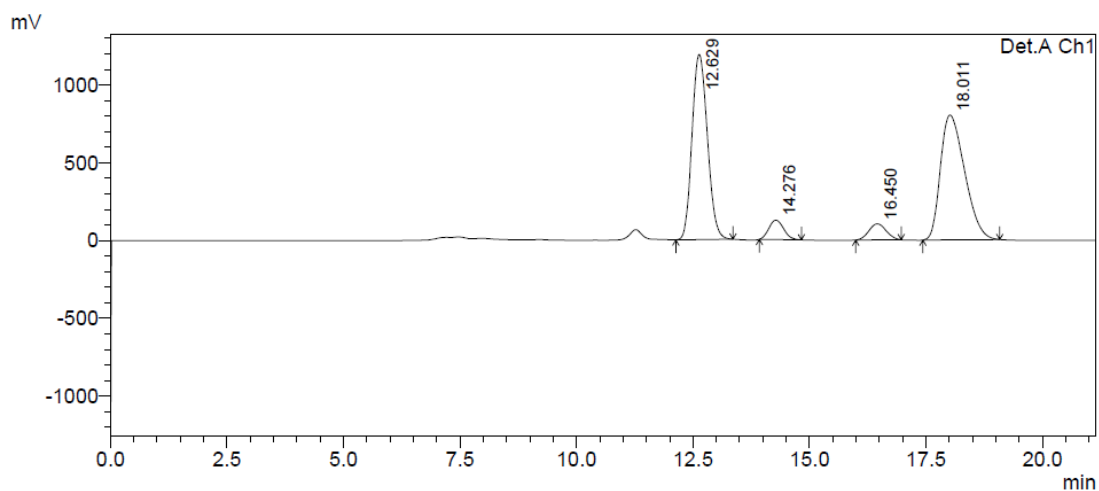

1 Det.A Ch1/254nm

PeakTable

Detector A Ch1 254nm

| Peak# | Ret. Time | Area     | Height  | Area %  | Height % |
|-------|-----------|----------|---------|---------|----------|
| 1     | 12.629    | 27326813 | 1190520 | 44.306  | 53.595   |
| 2     | 14.276    | 2733105  | 124961  | 4.431   | 5.625    |
| 3     | 16.450    | 2667143  | 103553  | 4.324   | 4.662    |
| 4     | 18.011    | 28950338 | 802304  | 46.938  | 36.118   |
| Total |           | 61677398 | 2221338 | 100.000 | 100.000  |

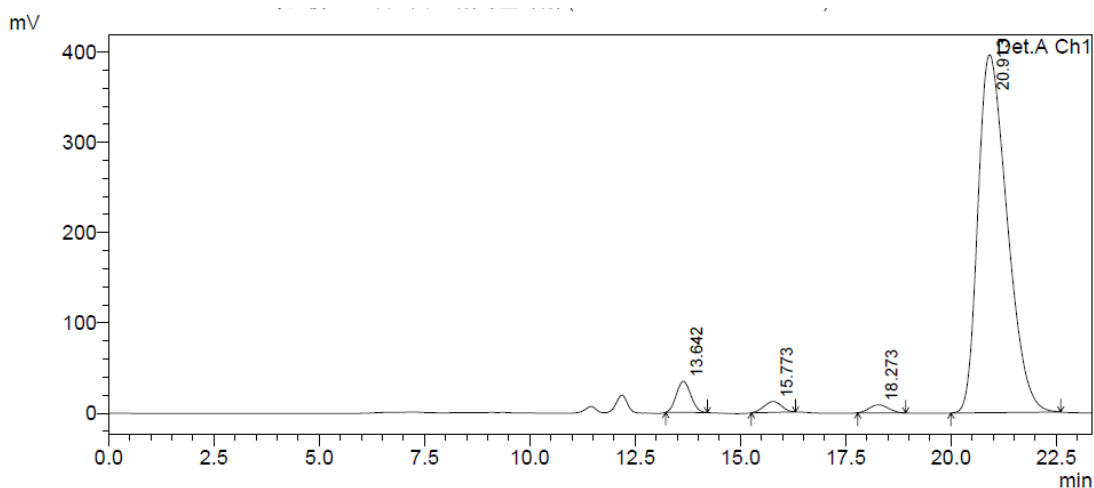

1 Det.A Ch1/254nm

PeakTable

Detector A Ch1 254nm

| Peak# | Ret. Time | Area     | Height | Area %  | Height % |
|-------|-----------|----------|--------|---------|----------|
| 1     | 13.642    | 828180   | 34462  | 4.022   | 7.626    |
| 2     | 15.773    | 348442   | 12058  | 1.692   | 2.668    |
| 3     | 18.273    | 279910   | 8932   | 1.359   | 1.977    |
| 4     | 20.913    | 19134629 | 396427 | 92.926  | 87.729   |
| Total |           | 20591161 | 451878 | 100.000 | 100.000  |

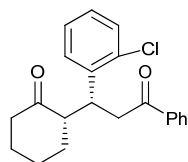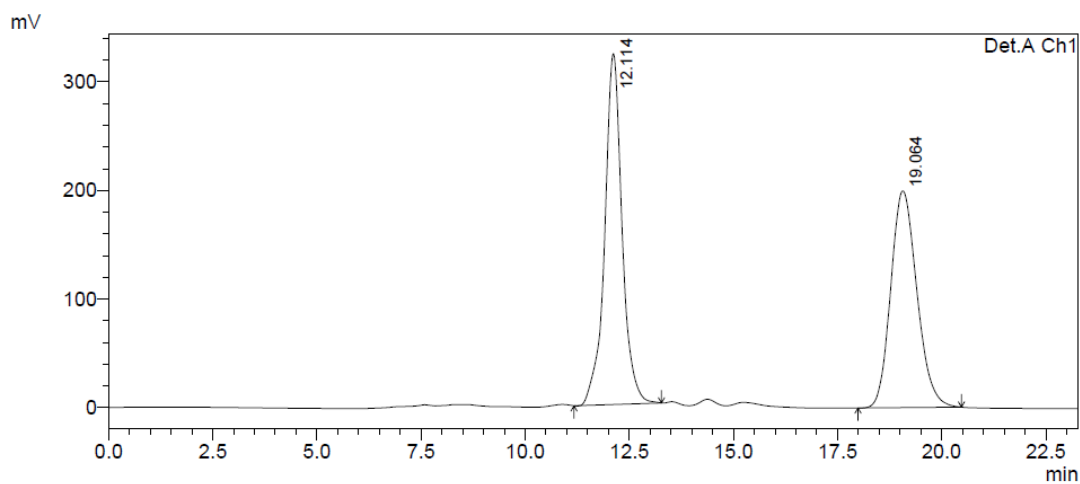

1 Det.A Ch1/254nm

PeakTable

Detector A Ch1 254nm

| Peak# | Ret. Time | Area     | Height | Area %  | Height % |
|-------|-----------|----------|--------|---------|----------|
| 1     | 12.114    | 9385672  | 323113 | 51.836  | 61.817   |
| 2     | 19.064    | 8720959  | 199577 | 48.164  | 38.183   |
| Total |           | 18106631 | 522690 | 100.000 | 100.000  |

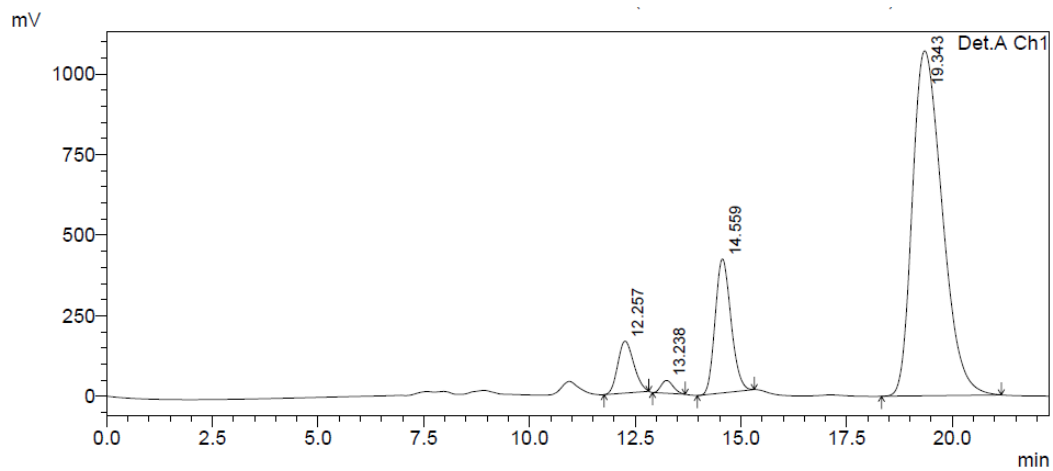

1 Det.A Ch1/254nm

PeakTable

Detector A Ch1 254nm

| Peak# | Ret. Time | Area     | Height  | Area %  | Height % |
|-------|-----------|----------|---------|---------|----------|
| 1     | 12.257    | 4245428  | 161099  | 6.195   | 9.547    |
| 2     | 13.238    | 797571   | 40000   | 1.164   | 2.370    |
| 3     | 14.559    | 10833404 | 415825  | 15.809  | 24.641   |
| 4     | 19.343    | 52650186 | 1070593 | 76.832  | 63.442   |
| Total |           | 68526589 | 1687516 | 100.000 | 100.000  |

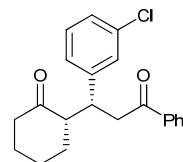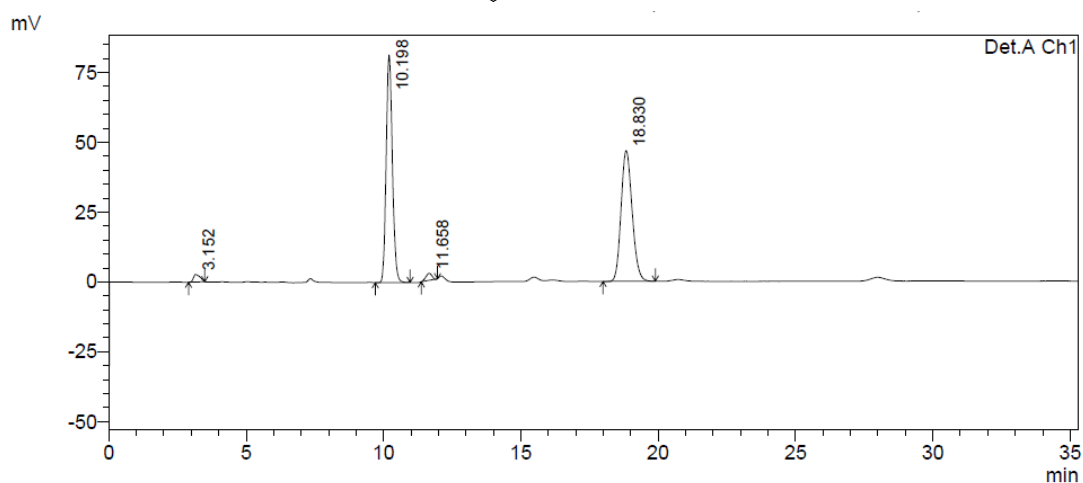

1 Det.A Ch1/254nm

PeakTable

Detector A Ch1 254nm

| Peak# | Ret. Time | Area    | Height | Area %  | Height % |
|-------|-----------|---------|--------|---------|----------|
| 1     | 3.152     | 44891   | 2764   | 1.680   | 2.069    |
| 2     | 10.198    | 1278989 | 81511  | 47.857  | 61.023   |
| 3     | 11.658    | 37111   | 2490   | 1.389   | 1.864    |
| 4     | 18.830    | 1311516 | 46808  | 49.074  | 35.043   |
| Total |           | 2672506 | 133573 | 100.000 | 100.000  |

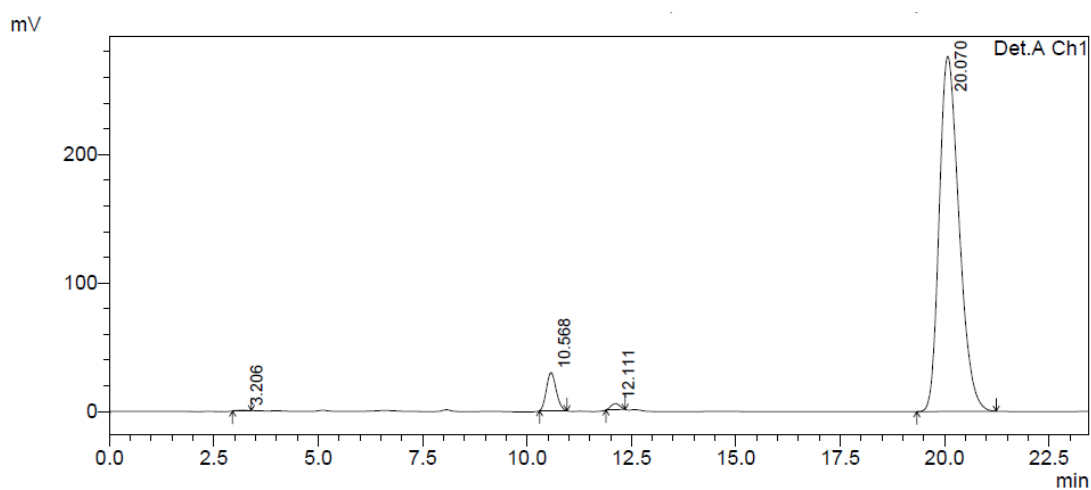

1 Det.A Ch1/254nm

PeakTable

Detector A Ch1 254nm

| Peak# | Ret. Time | Area    | Height | Area %  | Height % |
|-------|-----------|---------|--------|---------|----------|
| 1     | 3.206     | 5578    | 341    | 0.058   | 0.110    |
| 2     | 10.568    | 481814  | 29667  | 4.969   | 9.531    |
| 3     | 12.111    | 71035   | 4767   | 0.733   | 1.532    |
| 4     | 20.070    | 9137634 | 276502 | 94.241  | 88.828   |
| Total |           | 9696061 | 311278 | 100.000 | 100.000  |

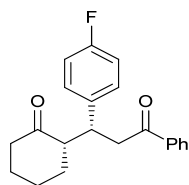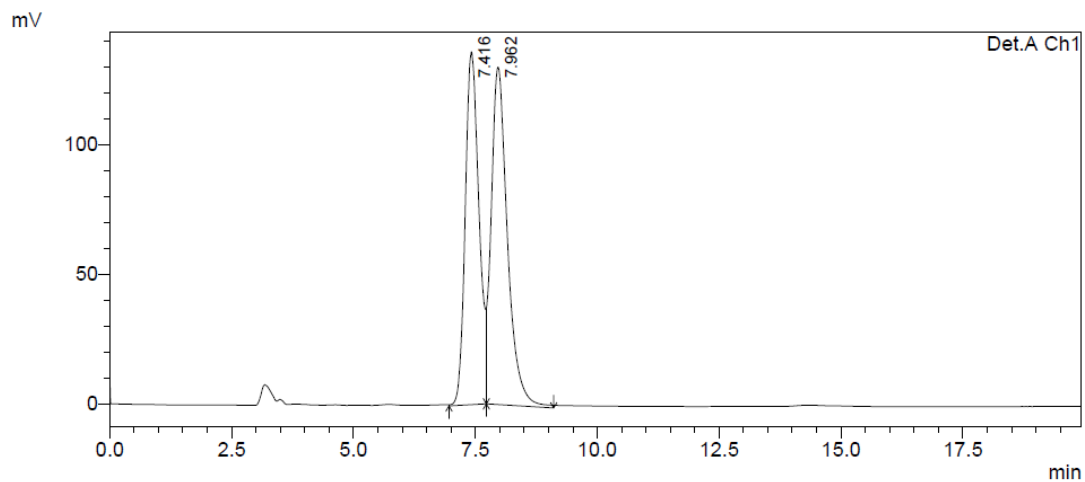

1 Det.A Ch1/254nm

PeakTable

Detector A Ch1 254nm

| Peak# | Ret. Time | Area    | Height | Area %  | Height % |
|-------|-----------|---------|--------|---------|----------|
| 1     | 7.416     | 2667197 | 136078 | 47.008  | 51.118   |
| 2     | 7.962     | 3006710 | 130127 | 52.992  | 48.882   |
| Total |           | 5673908 | 266205 | 100.000 | 100.000  |

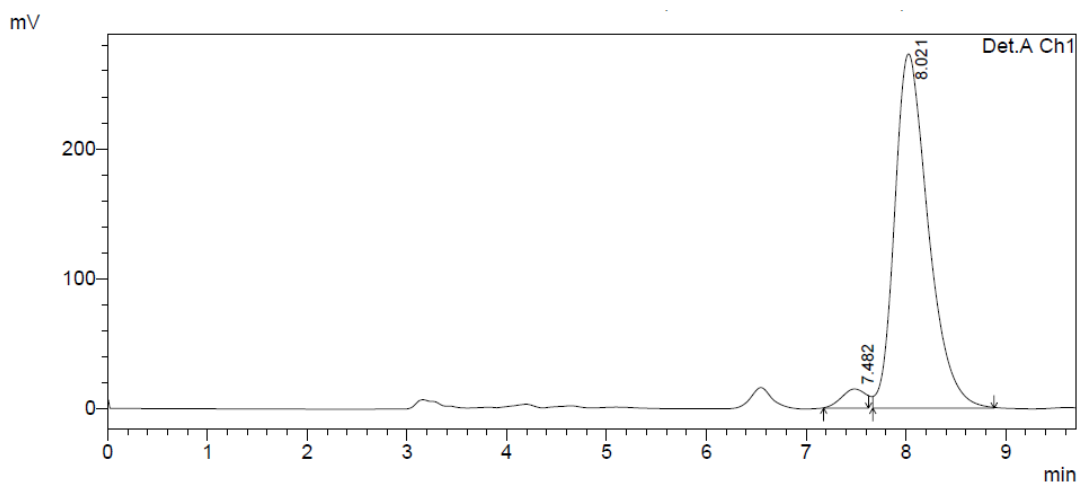

1 Det.A Ch1/254n

PeakTable

Detector A Ch1 254nm

| Peak# | Ret. Time | Area    | Height | Area %  | Height % |
|-------|-----------|---------|--------|---------|----------|
| 1     | 7.482     | 243584  | 14815  | 3.668   | 5.148    |
| 2     | 8.021     | 6396730 | 272957 | 96.332  | 94.852   |
| Total |           | 6640314 | 287772 | 100.000 | 100.000  |

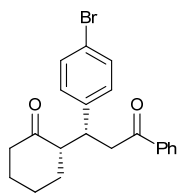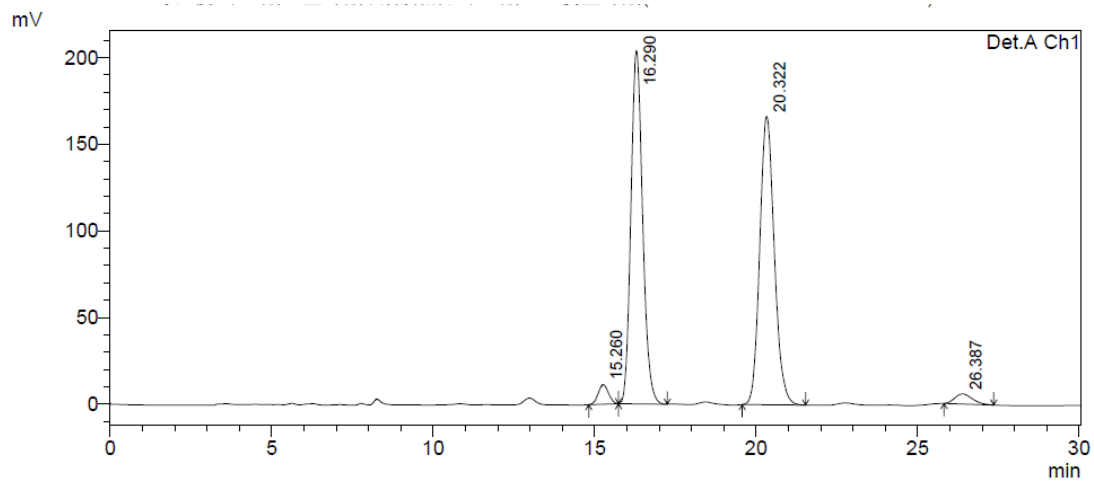

1 Det.A Ch1/254nm

PeakTable

| Peak# | Ret. Time | Area     | Height | Area %  | Height % |
|-------|-----------|----------|--------|---------|----------|
| 1     | 15.260    | 251416   | 11337  | 2.320   | 2.926    |
| 2     | 16.290    | 5143562  | 203881 | 47.472  | 52.620   |
| 3     | 20.322    | 5218243  | 166397 | 48.162  | 42.945   |
| 4     | 26.387    | 221615   | 5847   | 2.045   | 1.509    |
| Total |           | 10834836 | 387461 | 100.000 | 100.000  |

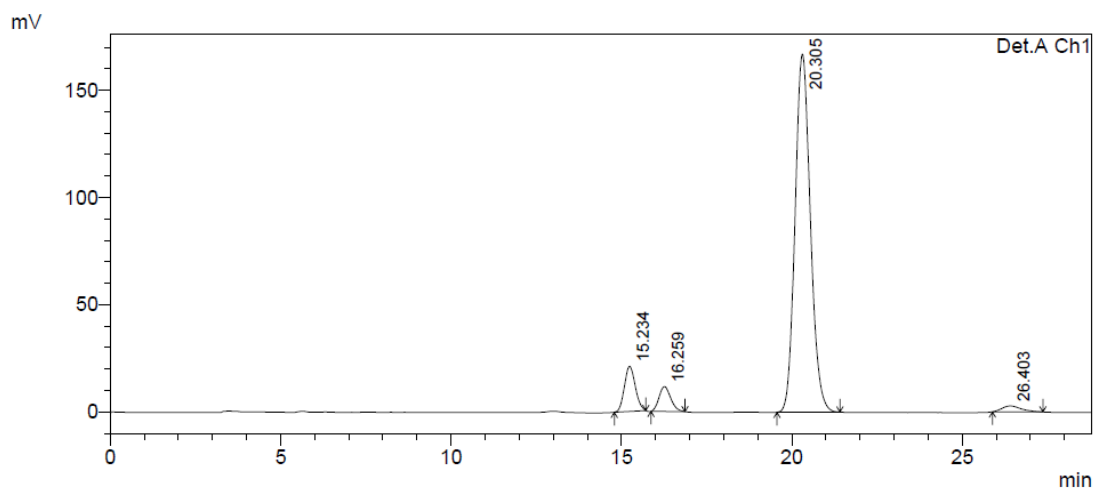

1 Det.A Ch1/254nm

PeakTable

| Peak# | Ret. Time | Area    | Height | Area %  | Height % |
|-------|-----------|---------|--------|---------|----------|
| 1     | 15.234    | 468527  | 21068  | 7.699   | 10.406   |
| 2     | 16.259    | 275824  | 11586  | 4.532   | 5.722    |
| 3     | 20.305    | 5232454 | 167055 | 85.978  | 82.508   |
| 4     | 26.403    | 109020  | 2762   | 1.791   | 1.364    |
| Total |           | 6085826 | 202470 | 100.000 | 100.000  |

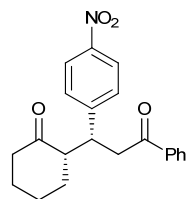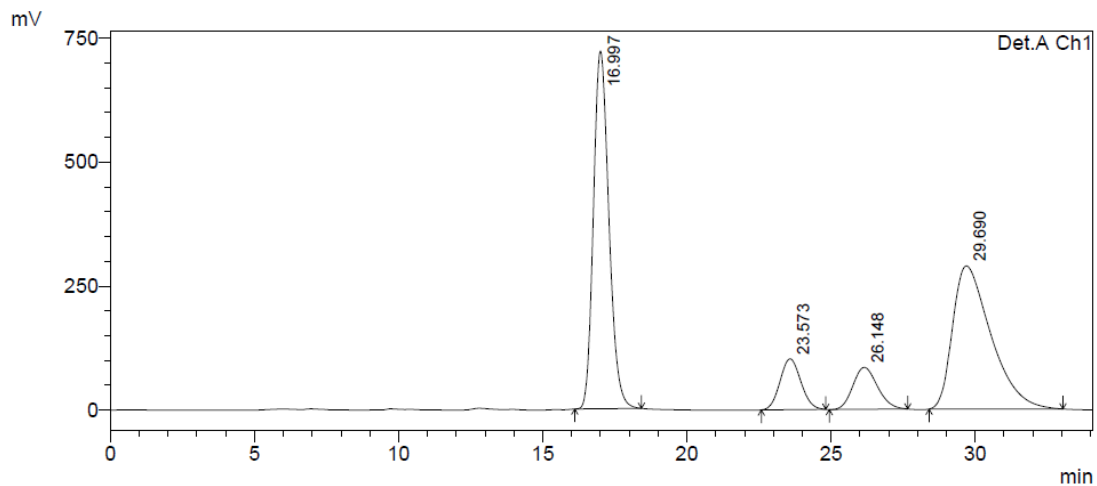

1 Det.A Ch1/254nm

PeakTable

| Peak# | Ret. Time | Area     | Height  | Area %  | Height % |
|-------|-----------|----------|---------|---------|----------|
| 1     | 16.997    | 26944880 | 721462  | 42.205  | 60.260   |
| 2     | 23.573    | 5153882  | 102607  | 8.073   | 8.570    |
| 3     | 26.148    | 5032227  | 84593   | 7.882   | 7.066    |
| 4     | 29.690    | 26712532 | 288583  | 41.841  | 24.104   |
| Total |           | 63843520 | 1197245 | 100.000 | 100.000  |

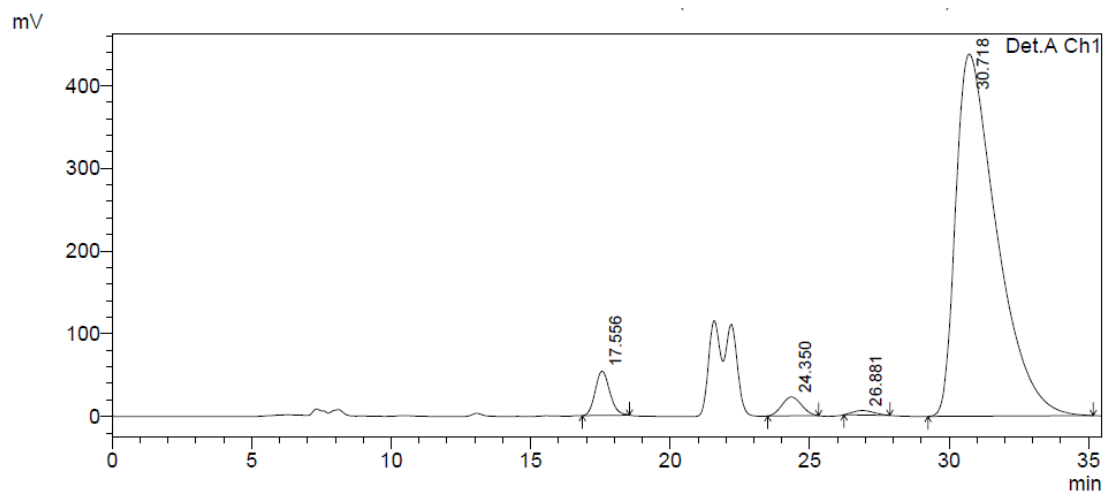

1 Det.A Ch1/254nm

PeakTable

| Peak# | Ret. Time | Area     | Height | Area %  | Height % |
|-------|-----------|----------|--------|---------|----------|
| 1     | 17.556    | 1934798  | 53360  | 4.029   | 10.273   |
| 2     | 24.350    | 1117800  | 22830  | 2.328   | 4.395    |
| 3     | 26.881    | 284274   | 5425   | 0.592   | 1.045    |
| 4     | 30.718    | 44679202 | 437805 | 93.051  | 84.287   |
| Total |           | 48016075 | 519420 | 100.000 | 100.000  |

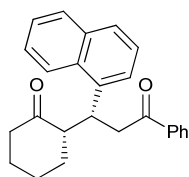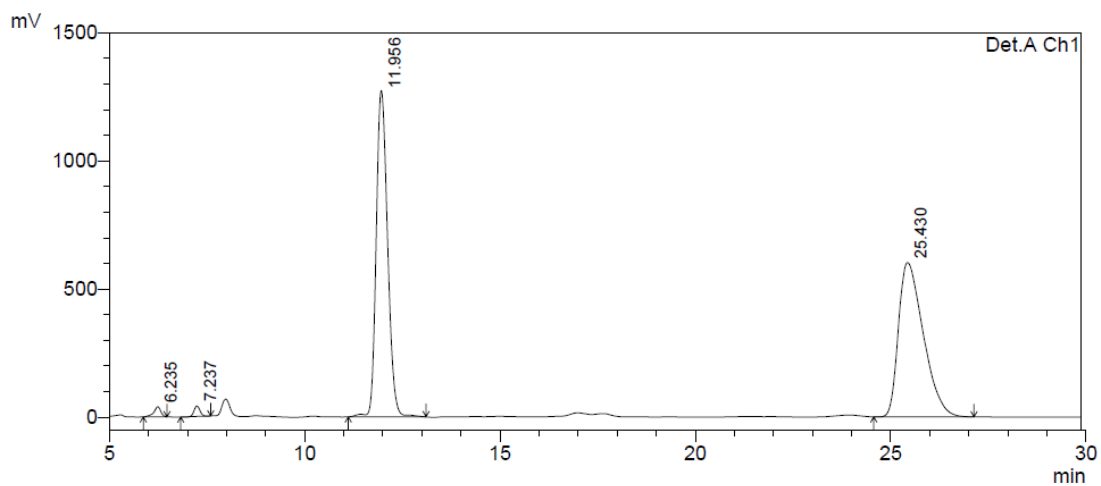

1 Det.A Ch1/254nm

PeakTable

Detector A Ch1 254nm

| Peak# | Ret. Time | Area     | Height  | Area %  | Height % |
|-------|-----------|----------|---------|---------|----------|
| 1     | 6.235     | 482188   | 39163   | 0.905   | 2.002    |
| 2     | 7.237     | 409990   | 40635   | 0.770   | 2.078    |
| 3     | 11.956    | 25729591 | 1273630 | 48.293  | 65.117   |
| 4     | 25.430    | 26656859 | 602493  | 50.033  | 30.804   |
| Total |           | 53278627 | 1955920 | 100.000 | 100.000  |

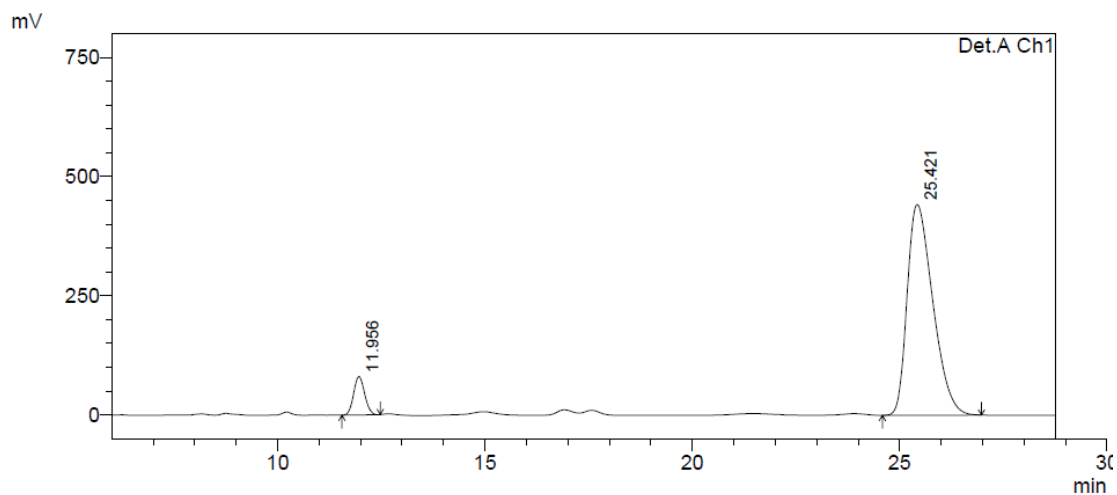

1 Det.A Ch1/254nm

PeakTable

Detector A Ch1 254nm

| Peak# | Ret. Time | Area     | Height | Area %  | Height % |
|-------|-----------|----------|--------|---------|----------|
| 1     | 11.956    | 1490262  | 80552  | 7.260   | 15.407   |
| 2     | 25.421    | 19037891 | 442285 | 92.740  | 84.593   |
| Total |           | 20528153 | 522836 | 100.000 | 100.000  |



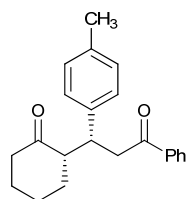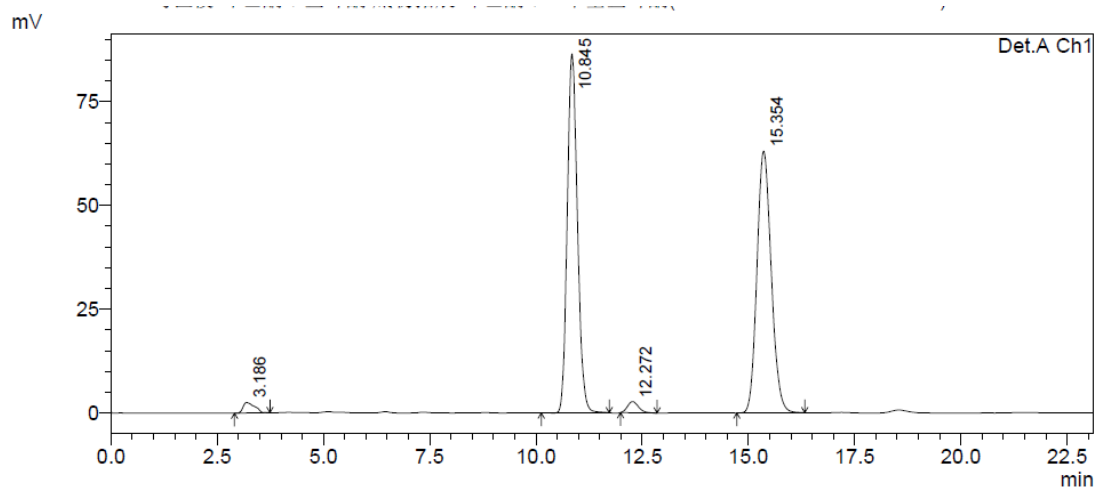

1 Det.A Ch1/254n

PeakTable

Detector A Ch1 254nm

| Peak# | Ret. Time | Area    | Height | Area %  | Height % |
|-------|-----------|---------|--------|---------|----------|
| 1     | 3.186     | 47361   | 2549   | 1.574   | 1.647    |
| 2     | 10.845    | 1442100 | 86466  | 47.919  | 55.879   |
| 3     | 12.272    | 47967   | 2686   | 1.594   | 1.736    |
| 4     | 15.354    | 1472004 | 63036  | 48.913  | 40.737   |
| Total |           | 3009432 | 154737 | 100.000 | 100.000  |

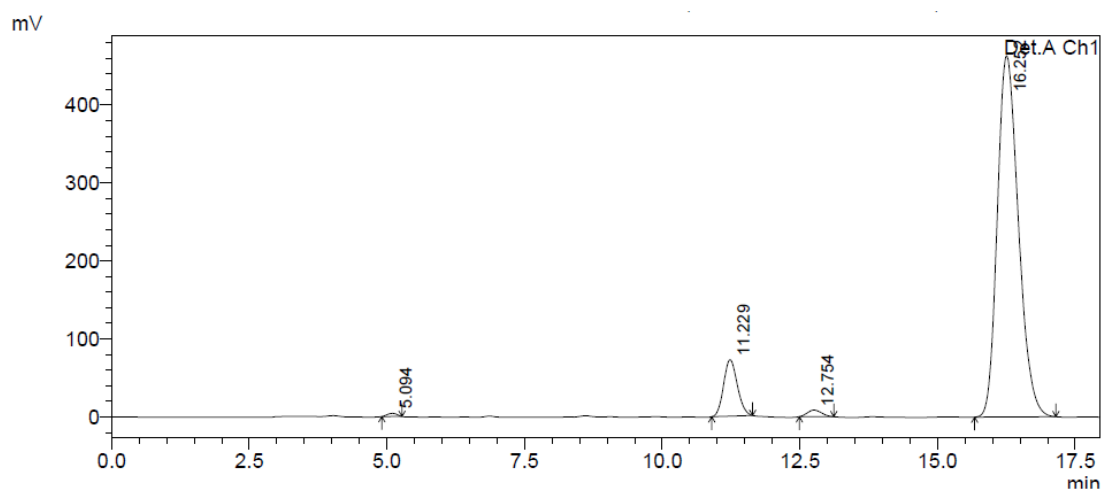

1 Det.A Ch1/254n

PeakTable

Detector A Ch1 254nm

| Peak# | Ret. Time | Area     | Height | Area %  | Height % |
|-------|-----------|----------|--------|---------|----------|
| 1     | 5.094     | 50892    | 4091   | 0.369   | 0.747    |
| 2     | 11.229    | 1257102  | 72438  | 9.111   | 13.220   |
| 3     | 12.754    | 152177   | 8482   | 1.103   | 1.548    |
| 4     | 16.252    | 12338146 | 462941 | 89.418  | 84.486   |
| Total |           | 13798317 | 547952 | 100.000 | 100.000  |

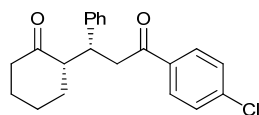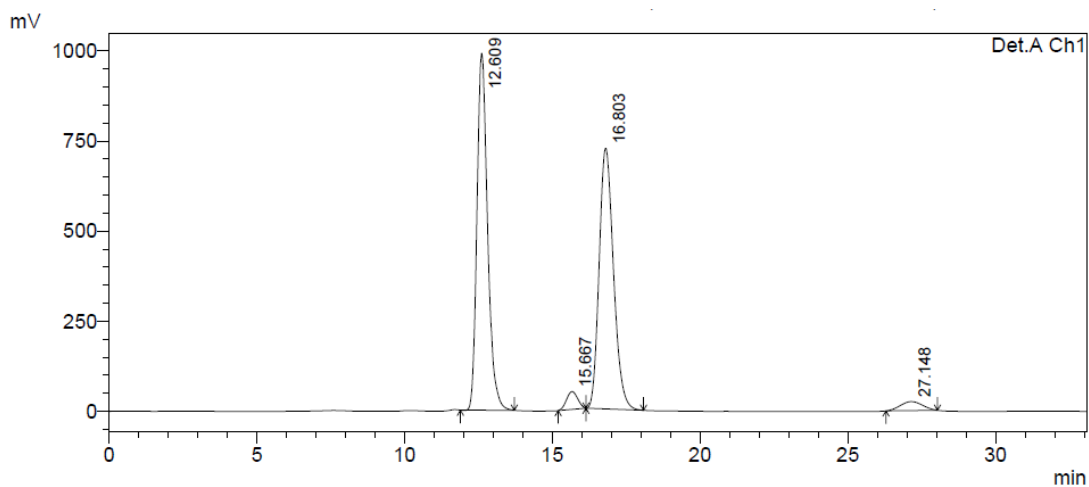

1 Det.A Ch1/254nr

PeakTable

Detector A Ch1 254nm

| Peak# | Ret. Time | Area     | Height  | Area %  | Height % |
|-------|-----------|----------|---------|---------|----------|
| 1     | 12.609    | 24729993 | 990327  | 47.811  | 55.370   |
| 2     | 15.667    | 1296710  | 49672   | 2.507   | 2.777    |
| 3     | 16.803    | 24407599 | 723699  | 47.187  | 40.463   |
| 4     | 27.148    | 1290556  | 24852   | 2.495   | 1.390    |
| Total |           | 51724858 | 1788550 | 100.000 | 100.000  |

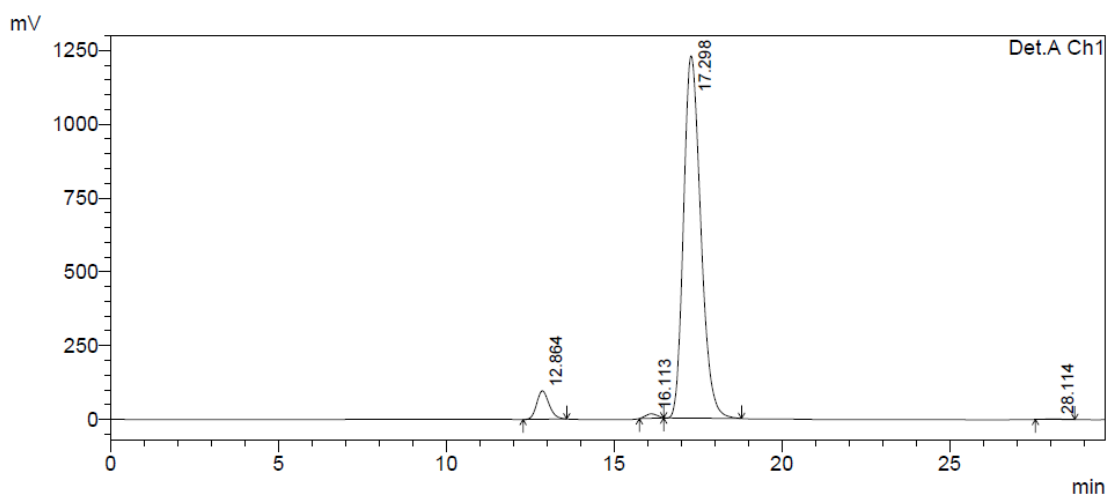

1 Det.A Ch1/254nm

PeakTable

Detector A Ch1 254nm

| Peak# | Ret. Time | Area     | Height  | Area %  | Height % |
|-------|-----------|----------|---------|---------|----------|
| 1     | 12.864    | 2469275  | 96513   | 5.293   | 7.200    |
| 2     | 16.113    | 353111   | 14823   | 0.757   | 1.106    |
| 3     | 17.298    | 43775353 | 1227792 | 93.832  | 91.595   |
| 4     | 28.114    | 55001    | 1322    | 0.118   | 0.099    |
| Total |           | 46652740 | 1340450 | 100.000 | 100.000  |

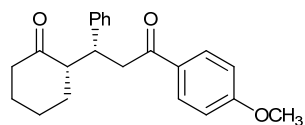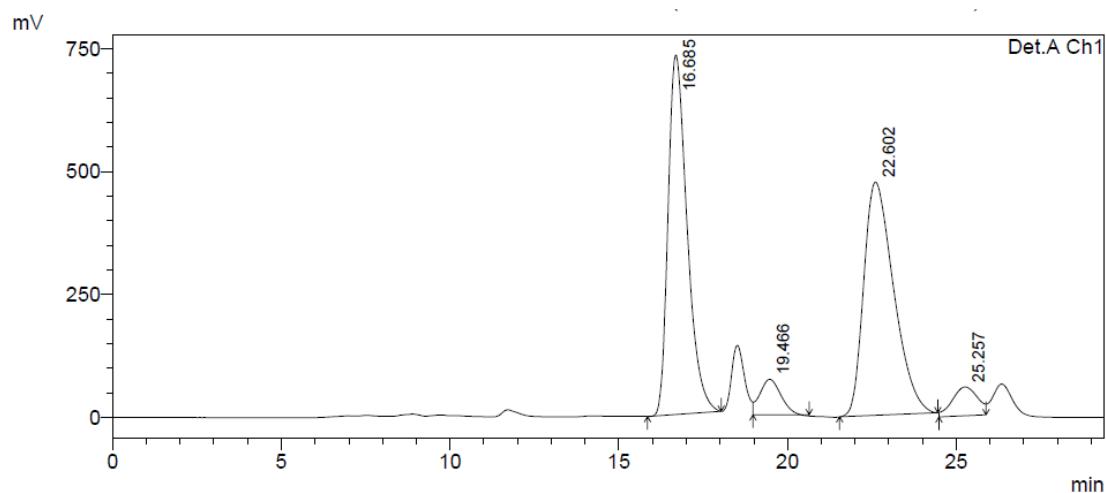

1 Det.A Ch1/254nm

PeakTable

Detector A Ch1 254nm

| Peak# | Ret. Time | Area     | Height  | Area %  | Height % |
|-------|-----------|----------|---------|---------|----------|
| 1     | 16.685    | 28703005 | 731685  | 44.705  | 54.715   |
| 2     | 19.466    | 3123963  | 72267   | 4.866   | 5.404    |
| 3     | 22.602    | 29311392 | 474616  | 45.653  | 35.492   |
| 4     | 25.257    | 3066880  | 58688   | 4.777   | 4.389    |
| Total |           | 64205240 | 1337256 | 100.000 | 100.000  |

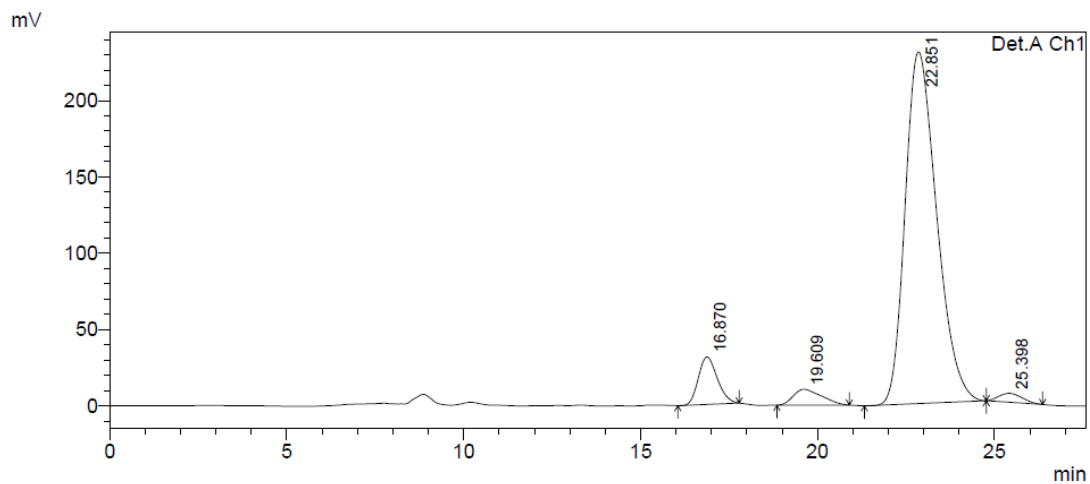

1 Det.A Ch1/254nm

PeakTable

Detector A Ch1 254nm

| Peak# | Ret. Time | Area     | Height | Area %  | Height % |
|-------|-----------|----------|--------|---------|----------|
| 1     | 16.870    | 1156429  | 31111  | 7.092   | 11.197   |
| 2     | 19.609    | 581390   | 10431  | 3.566   | 3.754    |
| 3     | 22.851    | 14298417 | 230511 | 87.693  | 82.962   |
| 4     | 25.398    | 268906   | 5798   | 1.649   | 2.087    |
| Total |           | 16305143 | 277850 | 100.000 | 100.000  |

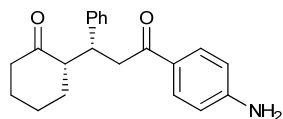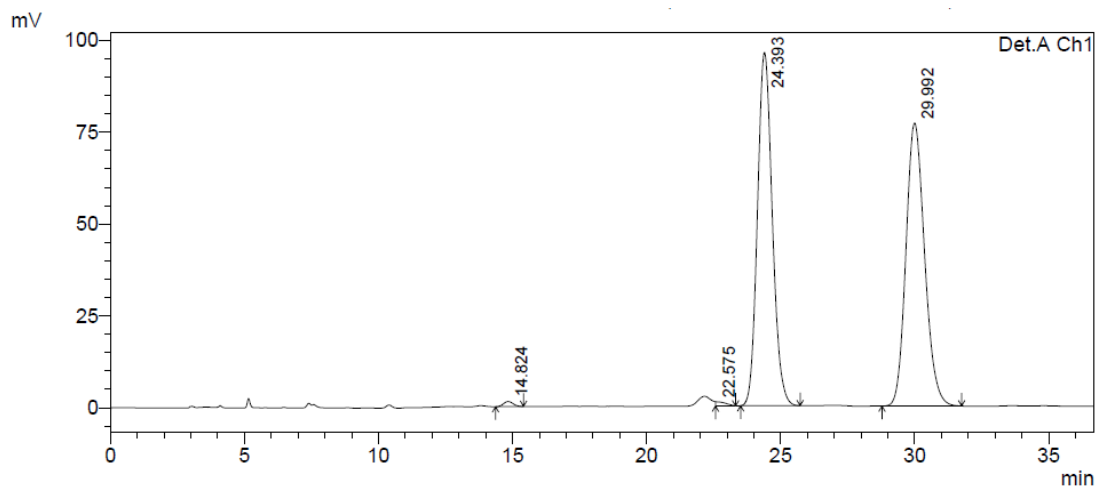

1 Det.A Ch1/254nm

PeakTable

| Peak# | Ret. Time | Area    | Height | Area %  | Height % |
|-------|-----------|---------|--------|---------|----------|
| 1     | 14.824    | 34408   | 1401   | 0.459   | 0.797    |
| 2     | 22.575    | 29830   | 1160   | 0.398   | 0.660    |
| 3     | 24.393    | 3698138 | 96152  | 49.334  | 54.708   |
| 4     | 29.992    | 3733770 | 77040  | 49.809  | 43.834   |
| Total |           | 7496147 | 175753 | 100.000 | 100.000  |

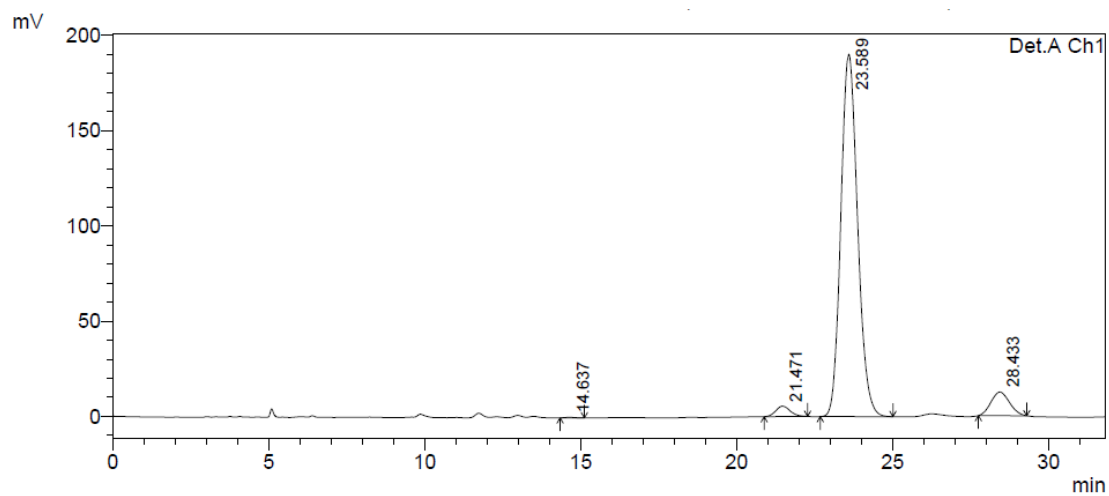

1 Det.A Ch1/254nm

PeakTable

| Peak# | Ret. Time | Area    | Height | Area %  | Height % |
|-------|-----------|---------|--------|---------|----------|
| 1     | 14.637    | 5906    | 297    | 0.076   | 0.142    |
| 2     | 21.471    | 175664  | 5500   | 2.253   | 2.637    |
| 3     | 23.589    | 7103406 | 190376 | 91.108  | 91.280   |
| 4     | 28.433    | 511752  | 12390  | 6.564   | 5.941    |
| Total |           | 7796729 | 208563 | 100.000 | 100.000  |

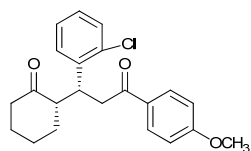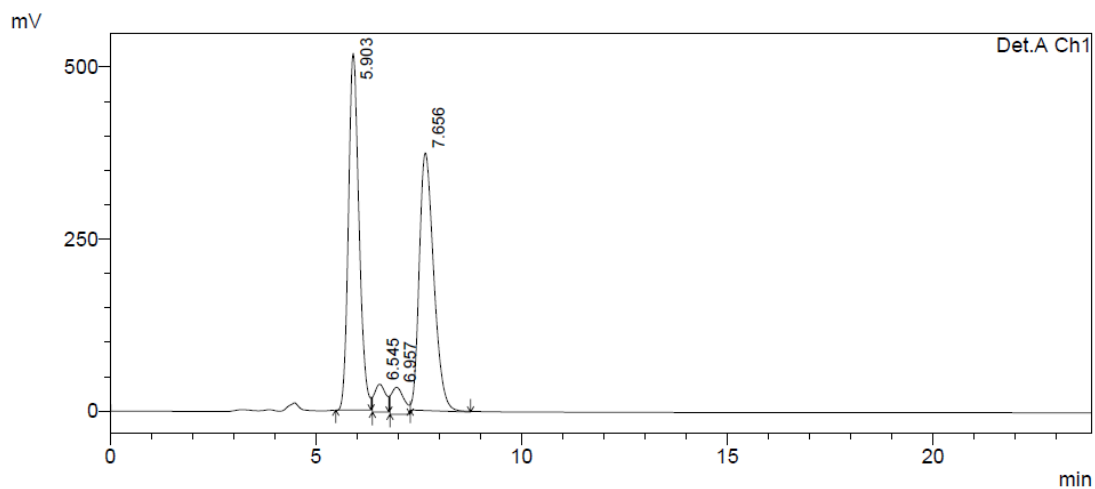

1 Det.A Ch1/254nm

PeakTable

| Peak# | Ret. Time | Area     | Height | Area %  | Height % |
|-------|-----------|----------|--------|---------|----------|
| 1     | 5.903     | 9251152  | 518273 | 46.210  | 53.296   |
| 2     | 6.545     | 759226   | 40587  | 3.792   | 4.174    |
| 3     | 6.957     | 818633   | 39140  | 4.089   | 4.025    |
| 4     | 7.656     | 9190604  | 374435 | 45.908  | 38.505   |
| Total |           | 20019614 | 972435 | 100.000 | 100.000  |

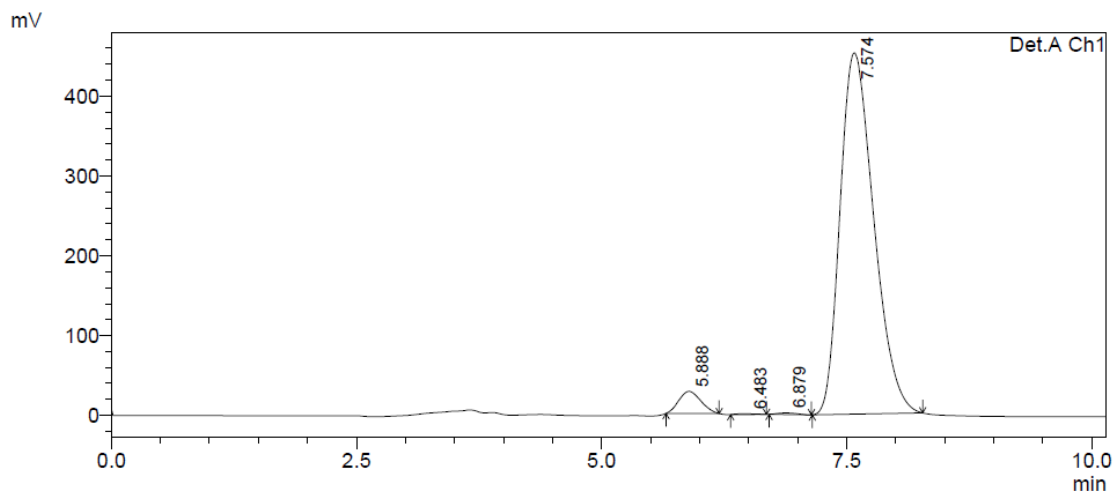

1 Det.A Ch1/254nm

PeakTable

| Peak# | Ret. Time | Area     | Height | Area %  | Height % |
|-------|-----------|----------|--------|---------|----------|
| 1     | 5.888     | 435503   | 27728  | 3.853   | 5.735    |
| 2     | 6.483     | 11155    | 1026   | 0.099   | 0.212    |
| 3     | 6.879     | 27428    | 2054   | 0.243   | 0.425    |
| 4     | 7.574     | 10828692 | 452696 | 95.806  | 93.628   |
| Total |           | 11302777 | 483503 | 100.000 | 100.000  |

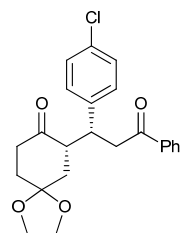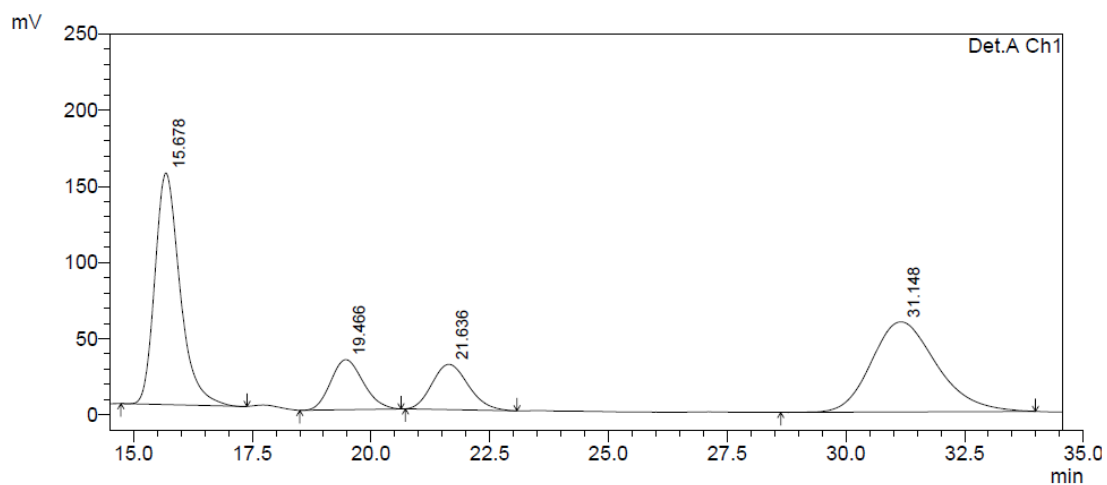

1 Det.A Ch1/254nm

PeakTable

Detector A Ch1 254nm

| Peak# | Ret. Time | Area     | Height | Area %  | Height % |
|-------|-----------|----------|--------|---------|----------|
| 1     | 15.678    | 5606608  | 151969 | 38.921  | 55.529   |
| 2     | 19.466    | 1560666  | 32827  | 10.834  | 11.995   |
| 3     | 21.636    | 1581387  | 29705  | 10.978  | 10.854   |
| 4     | 31.148    | 5656252  | 59173  | 39.266  | 21.622   |
| Total |           | 14404913 | 273674 | 100.000 | 100.000  |

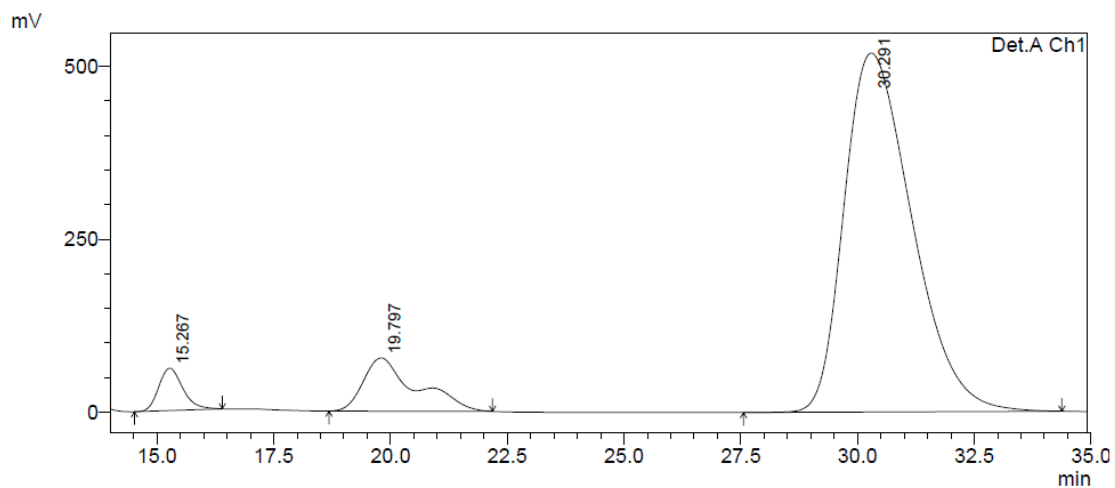

1 Det.A Ch1/254nm

PeakTable

Detector A Ch1 254nm

| Peak# | Ret. Time | Area     | Height | Area %  | Height % |
|-------|-----------|----------|--------|---------|----------|
| 1     | 15.267    | 2189829  | 61175  | 3.615   | 9.316    |
| 2     | 19.797    | 5985846  | 76822  | 9.881   | 11.699   |
| 3     | 30.291    | 52403956 | 518663 | 86.504  | 78.985   |
| Total |           | 60579632 | 656659 | 100.000 | 100.000  |

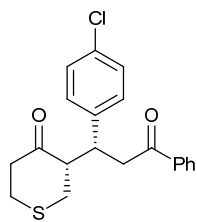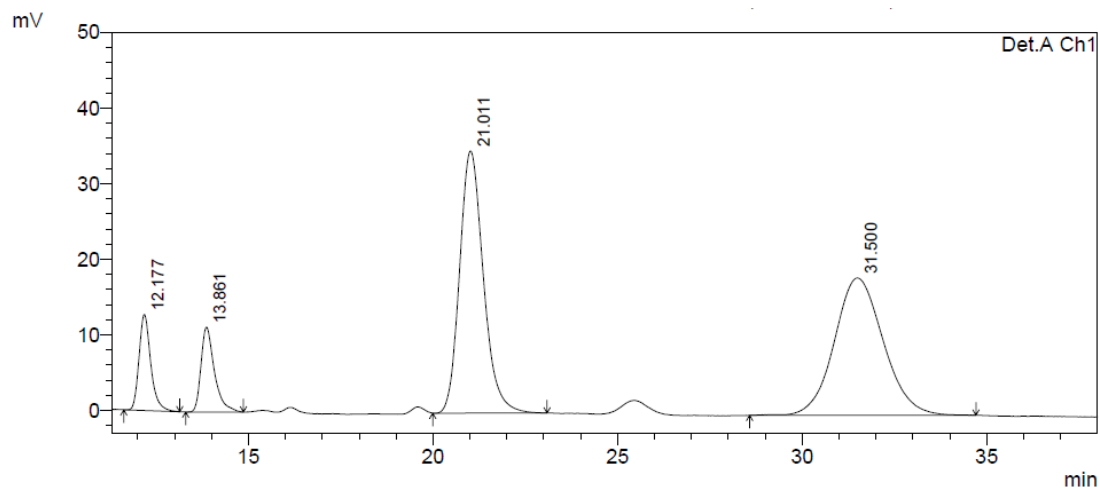

1 Det.A Ch1/254nm

PeakTable

| Detector A Ch1 254nm |           |         |        |         |          |
|----------------------|-----------|---------|--------|---------|----------|
| Peak#                | Ret. Time | Area    | Height | Area %  | Height % |
| 1                    | 12.177    | 280695  | 12716  | 7.398   | 16.552   |
| 2                    | 13.861    | 283830  | 11238  | 7.480   | 14.627   |
| 3                    | 21.011    | 1551758 | 34689  | 40.896  | 45.153   |
| 4                    | 31.500    | 1678115 | 18183  | 44.226  | 23.668   |
| Total                |           | 3794398 | 76826  | 100.000 | 100.000  |

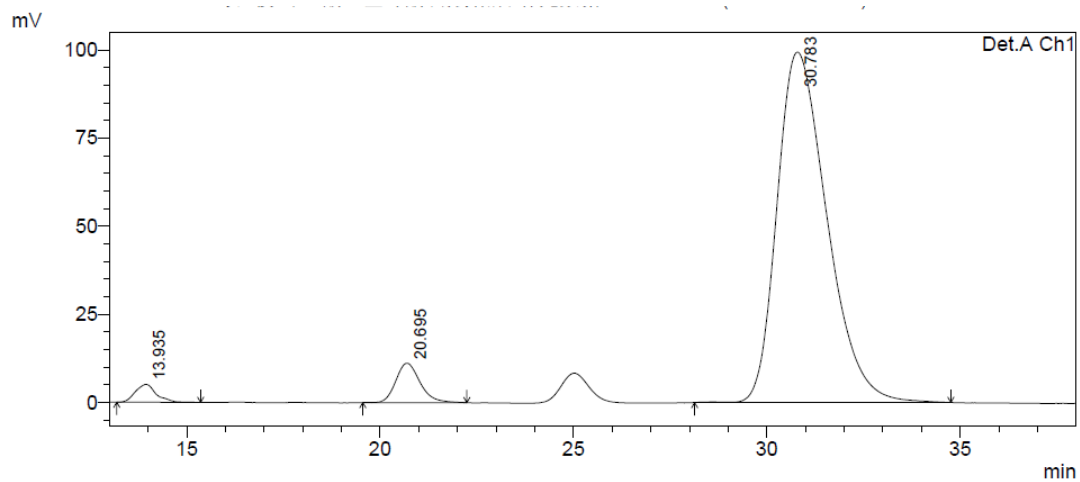

1 Det.A Ch1/254nm

PeakTable

| Detector A Ch1 254nm |           |         |        |         |          |
|----------------------|-----------|---------|--------|---------|----------|
| Peak#                | Ret. Time | Area    | Height | Area %  | Height % |
| 1                    | 13.935    | 191532  | 5079   | 1.998   | 4.394    |
| 2                    | 20.695    | 485231  | 11156  | 5.062   | 9.651    |
| 3                    | 30.783    | 8908375 | 99361  | 92.939  | 85.955   |
| Total                |           | 9585138 | 115597 | 100.000 | 100.000  |

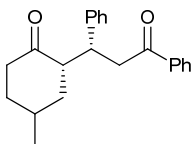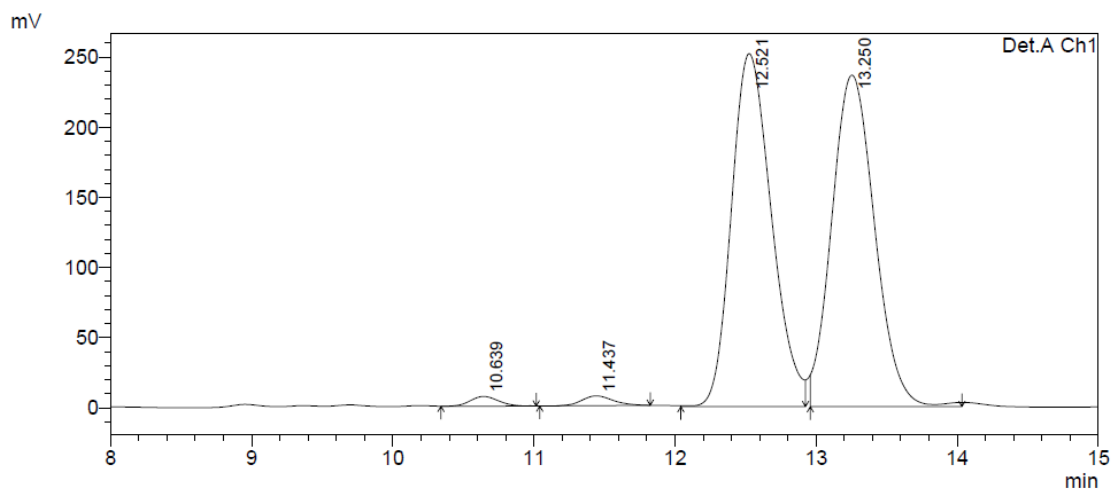

1 Det.A Ch1/254nm

PeakTable

Detector A Ch1 254nm

| Peak# | Ret. Time | Area     | Height | Area %  | Height % |
|-------|-----------|----------|--------|---------|----------|
| 1     | 10.639    | 94344    | 6872   | 0.928   | 1.369    |
| 2     | 11.437    | 108053   | 6989   | 1.063   | 1.393    |
| 3     | 12.521    | 4966157  | 251726 | 48.863  | 50.160   |
| 4     | 13.250    | 4994980  | 236254 | 49.146  | 47.077   |
| Total |           | 10163534 | 501841 | 100.000 | 100.000  |

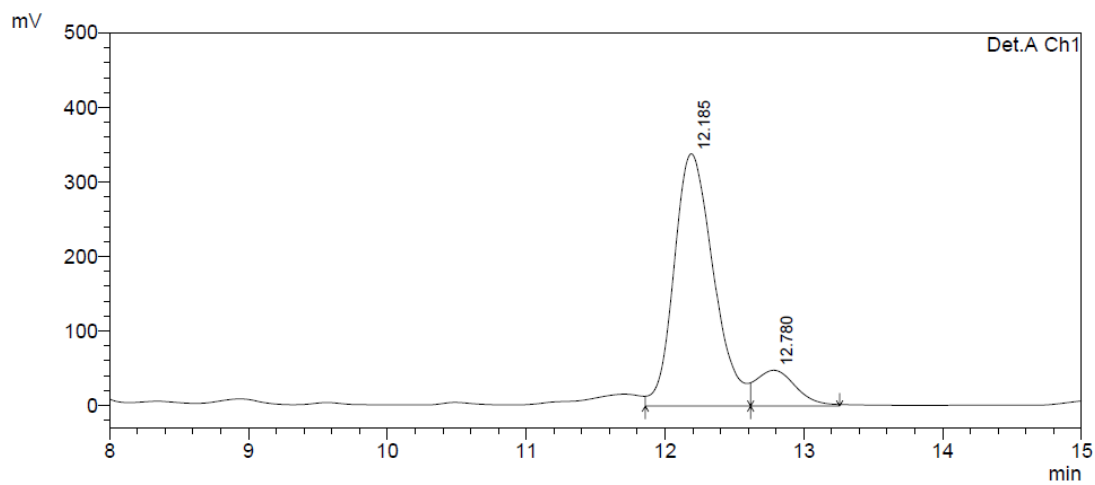

1 Det.A Ch1/254nm

PeakTable

Detector A Ch1 254nm

| Peak# | Ret. Time | Area    | Height | Area %  | Height % |
|-------|-----------|---------|--------|---------|----------|
| 1     | 12.185    | 6696469 | 338610 | 87.603  | 87.554   |
| 2     | 12.780    | 947670  | 48132  | 12.397  | 12.446   |
| Total |           | 7644139 | 386743 | 100.000 | 100.000  |



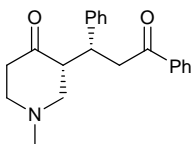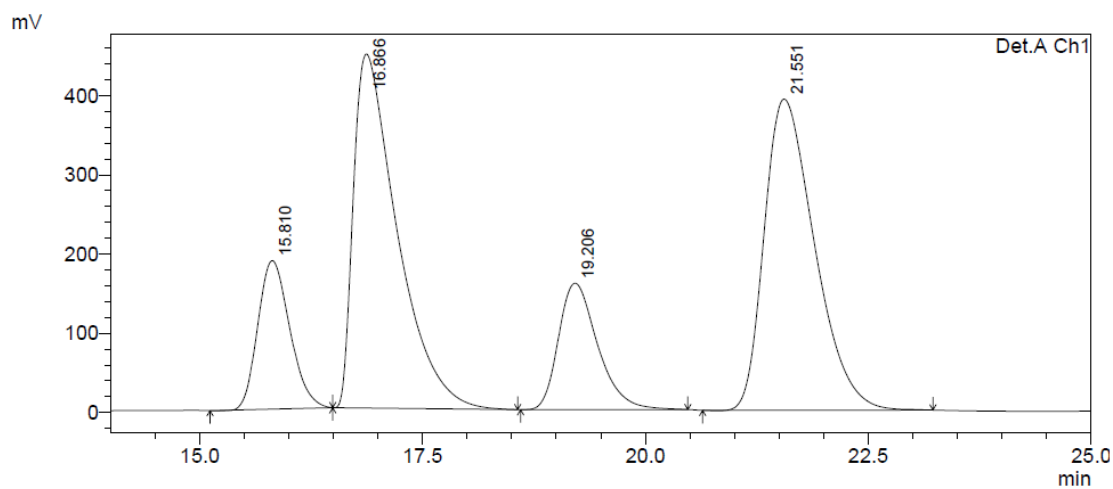

1 Det.A Ch1/254nm

PeakTable

Detector A Ch1 254nm

| Peak# | Ret. Time | Area     | Height  | Area %  | Height % |
|-------|-----------|----------|---------|---------|----------|
| 1     | 15.810    | 4661738  | 187422  | 11.604  | 15.794   |
| 2     | 16.866    | 15233152 | 446806  | 37.917  | 37.652   |
| 3     | 19.206    | 4880665  | 159721  | 12.148  | 13.459   |
| 4     | 21.551    | 15399693 | 392738  | 38.331  | 33.095   |
| Total |           | 40175248 | 1186687 | 100.000 | 100.000  |

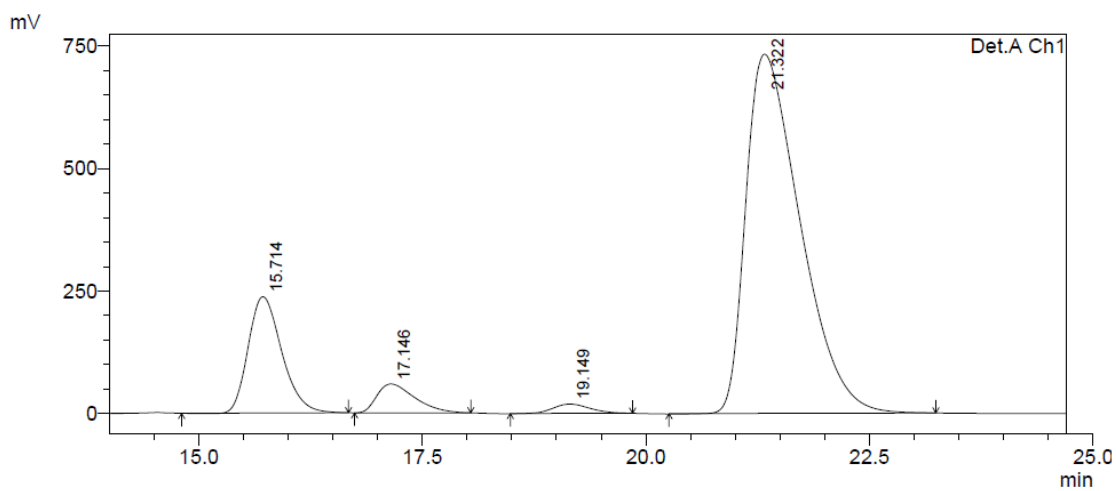

1 Det.A Ch1/254nm

PeakTable

Detector A Ch1 254nm

| Peak# | Ret. Time | Area     | Height  | Area %  | Height % |
|-------|-----------|----------|---------|---------|----------|
| 1     | 15.714    | 6186604  | 237534  | 15.687  | 22.644   |
| 2     | 17.146    | 1742593  | 59043   | 4.419   | 5.628    |
| 3     | 19.149    | 545639   | 19033   | 1.384   | 1.814    |
| 4     | 21.322    | 30963429 | 733391  | 78.511  | 69.913   |
| Total |           | 39438264 | 1049001 | 100.000 | 100.000  |

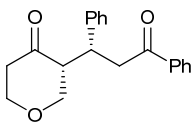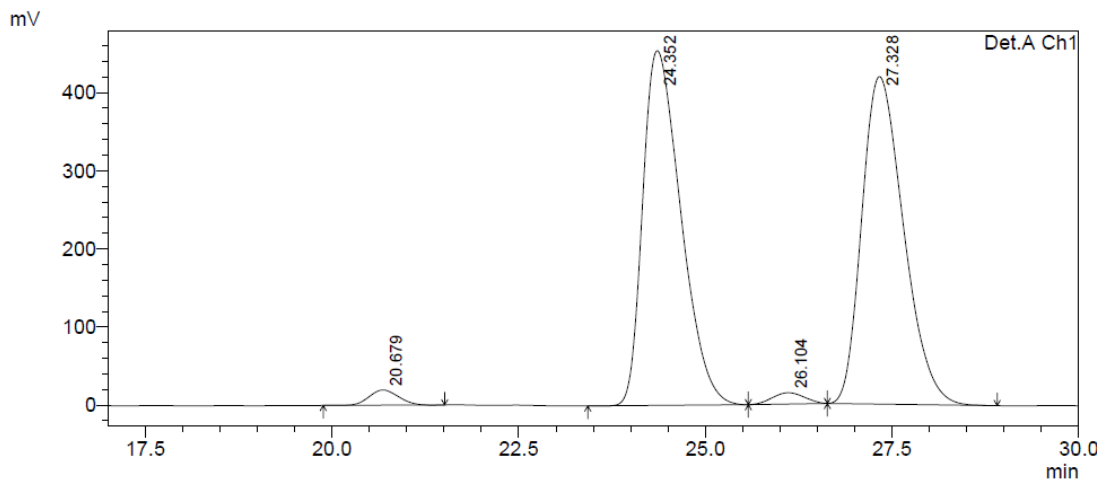

1 Det.A Ch1/254nm

PeakTable

| Peak# | Ret. Time | Area     | Height | Area %  | Height % |
|-------|-----------|----------|--------|---------|----------|
| 1     | 20.679    | 522801   | 19430  | 1.567   | 2.142    |
| 2     | 24.352    | 16096466 | 454102 | 48.235  | 50.053   |
| 3     | 26.104    | 430322   | 14430  | 1.290   | 1.591    |
| 4     | 27.328    | 16321271 | 419287 | 48.909  | 46.215   |
| Total |           | 33370860 | 907249 | 100.000 | 100.000  |

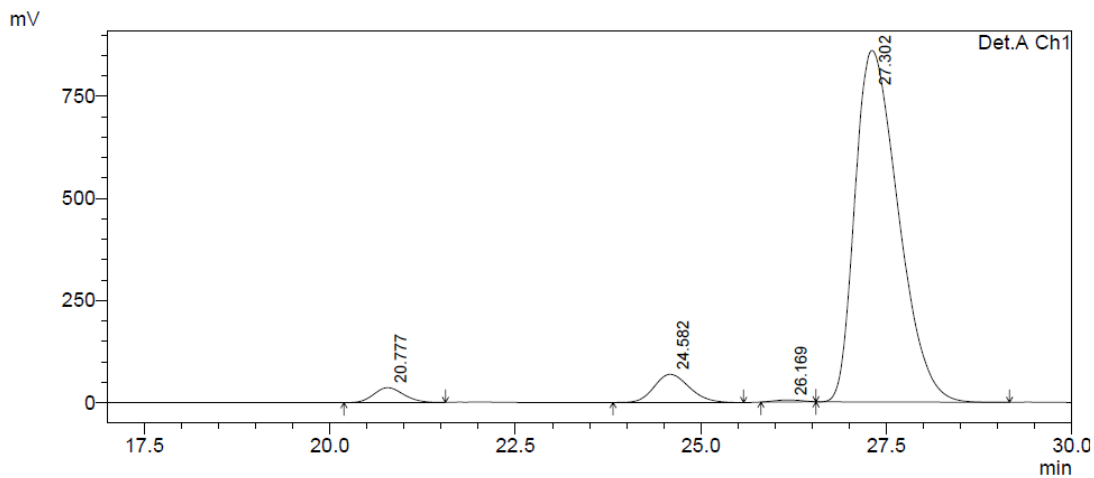

1 Det.A Ch1/254nm

PeakTable

| Peak# | Ret. Time | Area     | Height | Area %  | Height % |
|-------|-----------|----------|--------|---------|----------|
| 1     | 20.777    | 1015148  | 36389  | 2.645   | 3.749    |
| 2     | 24.582    | 2275043  | 68989  | 5.928   | 7.108    |
| 3     | 26.169    | 119438   | 4754   | 0.311   | 0.490    |
| 4     | 27.302    | 34965189 | 860492 | 91.115  | 88.653   |
| Total |           | 38374818 | 970624 | 100.000 | 100.000  |

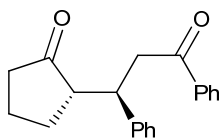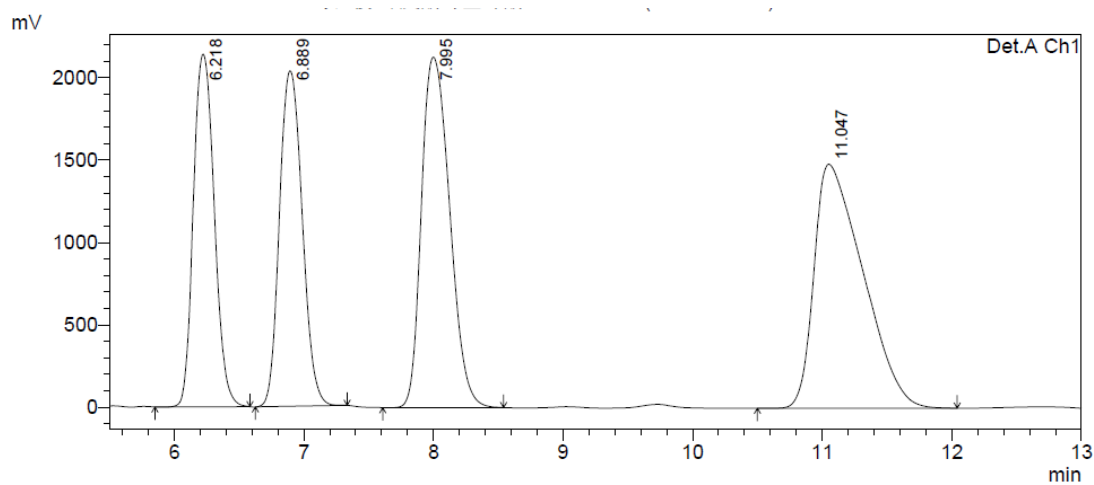

1 Det.A Ch1/254nm

PeakTable

| Detector A Ch1 254nm |           |           |         |         |          |
|----------------------|-----------|-----------|---------|---------|----------|
| Peak#                | Ret. Time | Area      | Height  | Area %  | Height % |
| 1                    | 6.218     | 24025324  | 2140008 | 20.027  | 27.493   |
| 2                    | 6.889     | 24918579  | 2036028 | 20.771  | 26.157   |
| 3                    | 7.995     | 32239757  | 2126834 | 26.874  | 27.323   |
| 4                    | 11.047    | 38783438  | 1481040 | 32.328  | 19.027   |
| Total                |           | 119967098 | 7783910 | 100.000 | 100.000  |

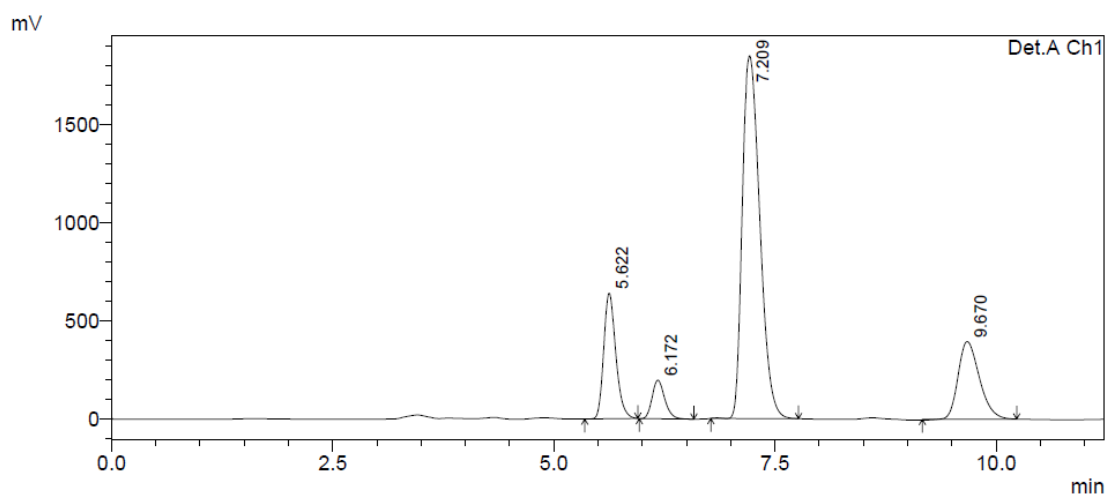

1 Det.A Ch1/254nm

PeakTable

| Detector A Ch1 254nm |           |          |         |         |          |
|----------------------|-----------|----------|---------|---------|----------|
| Peak#                | Ret. Time | Area     | Height  | Area %  | Height % |
| 1                    | 5.622     | 6080782  | 640124  | 15.149  | 20.785   |
| 2                    | 6.172     | 1939835  | 196631  | 4.833   | 6.385    |
| 3                    | 7.209     | 25490749 | 1847672 | 63.507  | 59.993   |
| 4                    | 9.670     | 6627278  | 395372  | 16.511  | 12.838   |
| Total                |           | 40138643 | 3079799 | 100.000 | 100.000  |

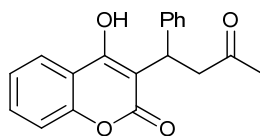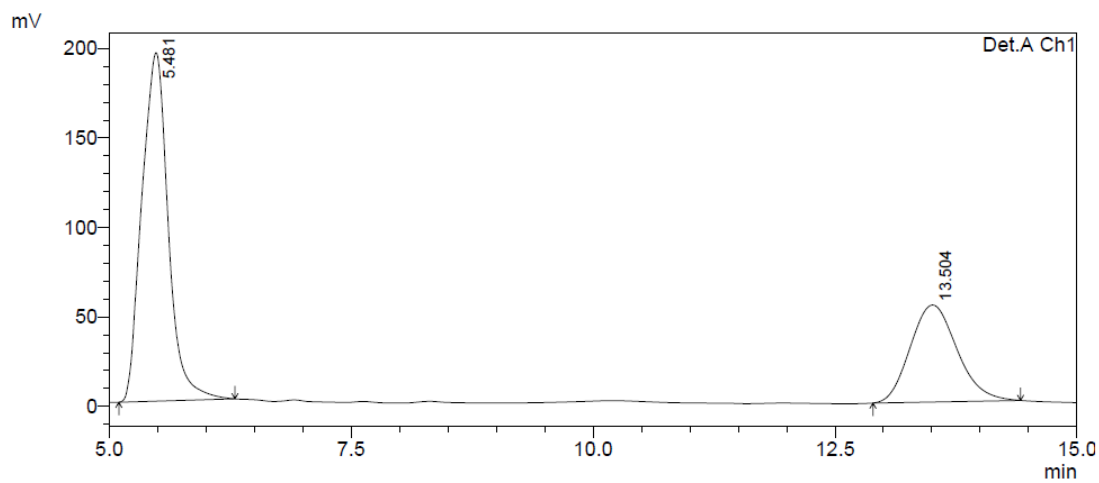

1 Det.A Ch1/254nm

PeakTable

| Peak# | Ret. Time | Area    | Height | Area %  | Height % |
|-------|-----------|---------|--------|---------|----------|
| 1     | 5.481     | 3693734 | 194837 | 66.916  | 78.224   |
| 2     | 13.504    | 1826198 | 54237  | 33.084  | 21.776   |
| Total |           | 5519933 | 249075 | 100.000 | 100.000  |

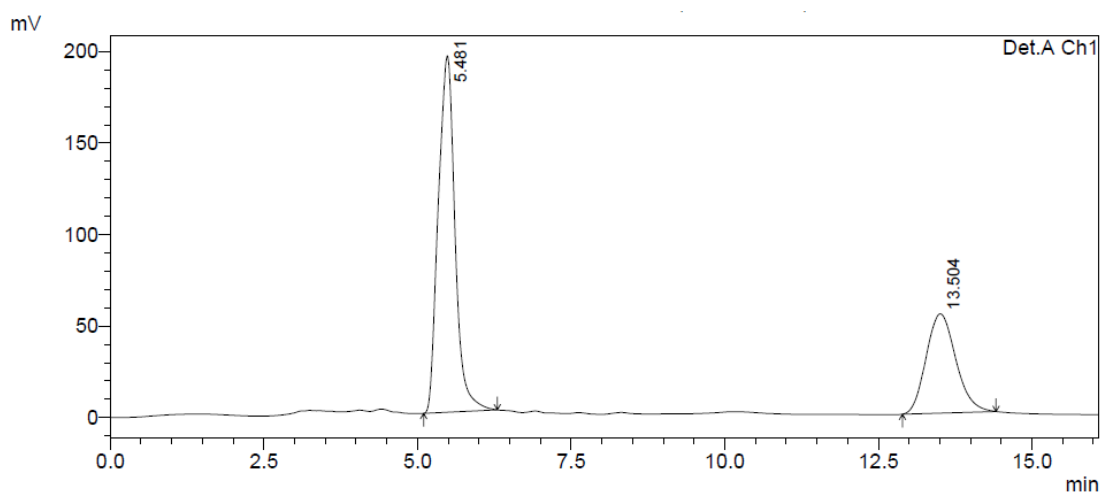

1 Det.A Ch1/254nm

PeakTable

| Peak# | Ret. Time | Area    | Height | Area %  | Height % |
|-------|-----------|---------|--------|---------|----------|
| 1     | 5.481     | 3693734 | 194837 | 66.916  | 78.224   |
| 2     | 13.504    | 1826198 | 54237  | 33.084  | 21.776   |
| Total |           | 5519933 | 249075 | 100.000 | 100.000  |
